# Supplementary material for: Integrative Transcriptomic Analysis Reveals Upregulated Apoptotic Signaling in Wound-Healing Pathway in Rat Liver Fibrosis Models
Source: Antioxidants (Basel). 2023 Aug 9;12(8):1588. doi: 10.3390/antiox12081588 (PMC10451232; doi:10.3390/antiox12081588)
Supplement: Supplementary file 1 [file antioxidants-12-01588-s001.zip]

Archive with 7 entries (7 files):
- antioxidants-2481078-supplementary figures.pdf
- Supplementary table S1.xlsx
- Supplementary table S2.xlsx
- Supplementary table S3.xlsx
- Supplementary table S4.xlsx
- Supplementary table S5.xlsx
- Supplementary table S6.xlsx
