# Supplementary material for: Integrative Transcriptomic Analysis Reveals Upregulated Apoptotic Signaling in Wound-Healing Pathway in Rat Liver Fibrosis Models
Source: Antioxidants (Basel). 2023 Aug 9;12(8):1588. doi: 10.3390/antiox12081588 (PMC10451232; doi:10.3390/antiox12081588)
Supplement: Supplementary file 1 [file antioxidants-12-01588-s001.zip › Supplementary table S1.xlsx]

## Sheet: Table 1
Gene symbol	logFC	p-value	adjusted p-value
Lif	11.837	2.44342e-27	7.9463e-25	Up
Defb1	11.043	5.5732e-22	9.15983e-20	Up
Tnnt2	10.881	5.84468e-21	8.04828e-19	Up
Doc2a	10.8763	6.40425e-21	8.66275e-19	Up
Adgrg2	10.6923	9.58722e-20	1.08549e-17	Up
Foxp3	10.4481	3.17514e-18	2.81188e-16	Up
Etv4	10.4391	3.57166e-18	3.13752e-16	Up
Nos2	10.4023	5.75093e-18	4.96627e-16	Up
Crlf1	10.3334	1.53349e-17	1.27388e-15	Up
Kif22	10.0838	4.98946e-16	3.23152e-14	Up
Prok2	10.0389	8.92505e-16	5.41347e-14	Up
Rnase1	9.95964	2.55401e-15	1.43522e-13	Up
Mcemp1	9.9395	2.97884e-15	1.64969e-13	Up
Eda2r	9.84374	1.05675e-14	5.4569e-13	Up
Mapk13	9.77618	2.41191e-14	1.20477e-12	Up
Atg9b	9.64155	2.2878e-40	2.18556e-37	Up
Plcd4	9.36751	3.57037e-12	1.25744e-10	Up
Cyp26c1	9.30289	8.21273e-12	2.74686e-10	Up
Fgf23	9.30289	8.21273e-12	2.74686e-10	Up
Prnd	9.2374	1.56288e-11	4.92549e-10	Up
Dhh	9.22056	1.94396e-11	5.99061e-10	Up
Btnl2	9.16881	3.78455e-11	1.08327e-09	Up
Wfikkn2	9.15114	4.74447e-11	1.33553e-09	Up
Plaat5	9.11513	7.50284e-11	2.04854e-09	Up
Gprc5a	9.0782	9.46504e-11	2.53368e-09	Up
Duox2	8.96139	3.12669e-10	7.44416e-09	Up
Pglyrp1	8.88027	4.14529e-29	1.58402e-26	Up
Gucy2c	8.86984	4.84407e-29	1.80589e-26	Up
Epo	8.85626	1.09629e-09	2.34033e-08	Up
Gprc5d	8.83428	9.91633e-11	2.62688e-09	Up
Lypd1	8.72338	2.96087e-10	7.12708e-09	Up
St8sia1	8.64524	6.94986e-10	1.55078e-08	Up
Slc15a1	8.61977	9.29778e-10	2.01014e-08	Up
Pkp1	8.59384	9.29778e-10	2.01014e-08	Up
Aplnr	8.57598	5.40809e-27	1.72214e-24	Up
Adam8	8.54374	6.26098e-46	1.19624e-42	Up
Uchl1	8.51314	2.27371e-09	4.59704e-08	Up
Cd209d	8.39799	7.89453e-09	1.44686e-07	Up
Ebf3	8.36771	7.89453e-09	1.44686e-07	Up
Gjb5	8.33678	1.08849e-08	1.94819e-07	Up
Aoc1	8.24255	1.06835e-24	2.4742e-22	Up
Pgf	8.20596	4.10802e-08	6.56098e-07	Up
Il6	8.20596	4.10802e-08	6.56098e-07	Up
Tnfsf9	8.17131	5.79163e-08	8.86214e-07	Up
Ddah2	8.15083	5.79163e-08	8.86214e-07	Up
Ckmt1	8.06208	1.16814e-07	1.65265e-06	Up
Adcy2	8.02375	1.67165e-07	2.27324e-06	Up
Fgf13	8.02375	1.67165e-07	2.27324e-06	Up
Rasal1	7.98438	2.40483e-07	3.15248e-06	Up
Ascl1	7.98438	2.40483e-07	3.15248e-06	Up
Cnksr1	7.98438	2.40483e-07	3.15248e-06	Up
Tbx1	7.9439	3.47842e-07	4.38677e-06	Up
Cxcl2	7.9296	1.30354e-22	2.29019e-20	Up
Stfa2l1	7.90225	5.05952e-07	6.1967e-06	Up
Kcnb1	7.81517	1.08934e-06	1.2343e-05	Up
Tuba3b	7.80028	1.08934e-06	1.2343e-05	Up
Mypn	7.76957	1.61305e-06	1.74614e-05	Up
Spta1	7.76957	1.61305e-06	1.74614e-05	Up
Tnfrsf8	7.76957	1.61305e-06	1.74614e-05	Up
Col9a3	7.72248	1.61305e-06	1.74614e-05	Up
Psrc1	7.72248	1.61305e-06	1.74614e-05	Up
Camp	7.72248	1.61305e-06	1.74614e-05	Up
Pappa1	7.72248	1.61305e-06	1.74614e-05	Up
Fst	7.68679	9.215e-35	5.21671e-32	Up
Bmp3	7.67381	2.40377e-06	2.52173e-05	Up
Olr1	7.67045	9.78471e-31	4.27312e-28	Up
Lcn2	7.65203	9.6901e-44	1.23428e-40	Up
Cxcl3	7.62344	3.60565e-06	3.62343e-05	Up
Serpine1	7.61063	2.88854e-40	2.59714e-37	Up
Slc38a1	7.57124	5.44527e-06	5.27446e-05	Up
Nppc	7.46081	1.26863e-05	0.000112022	Up
Clec12b	7.46081	1.26863e-05	0.000112022	Up
Efna3	7.46081	1.26863e-05	0.000112022	Up
Car12	7.36278	1.09343e-34	5.96895e-32	Up
Ttc9	7.3609	6.37664e-19	6.45476e-17	Up
Trh	7.34123	3.04594e-05	0.000241479	Up
Egflam	7.34123	3.04594e-05	0.000241479	Up
Olfm4	7.34123	3.04594e-05	0.000241479	Up
Clec4b2	7.34123	3.04594e-05	0.000241479	Up
Chit1	7.34123	3.04594e-05	0.000241479	Up
Epha10	7.34123	3.04594e-05	0.000241479	Up
Ap1g2	7.33248	3.04594e-05	0.000241479	Up
Bmp8a	7.3243	3.04594e-05	0.000241479	Up
Pla2g7	7.2951	4.50915e-28	1.56642e-25	Up
Bcat1	7.29383	1.5823e-18	1.5022e-16	Up
Lman1l	7.27751	3.04594e-05	0.000241479	Up
Ramp3	7.27498	2.15826e-18	1.97539e-16	Up
Aire	7.21084	4.77659e-05	0.000358772	Up
Cd8b	7.21084	4.77659e-05	0.000358772	Up
Guca2b	7.21084	4.77659e-05	0.000358772	Up
Has1	7.21084	4.77659e-05	0.000358772	Up
Bard1	7.21084	4.77659e-05	0.000358772	Up
Acoxl	7.21084	4.77659e-05	0.000358772	Up
Gpbar1	7.21084	4.77659e-05	0.000358772	Up
Ccl28	7.21084	4.77659e-05	0.000358772	Up
Foxq1	7.16326	1.08255e-17	9.09163e-16	Up
Sdk1	7.14093	7.55368e-05	0.000537014	Up
Il1rl2	7.14093	7.55368e-05	0.000537014	Up
Scn4b	7.14093	7.55368e-05	0.000537014	Up
Rbp7	7.13287	1.83326e-32	8.49132e-30	Up
Gdf15	7.12986	1.6754e-35	1.06702e-32	Up
Trem2	7.10207	2.36021e-22	4.00841e-20	Up
Rgs4	7.08325	2.14061e-30	9.08866e-28	Up
Areg	7.06747	0.000120499	0.000808174	Up
Cda	7.06747	0.000120499	0.000808174	Up
Dscaml1	7.06747	0.000120499	0.000808174	Up
Lama5	7.00669	1.42364e-36	9.461e-34	Up
Rab6b	6.99006	0.000193974	0.00122466	Up
Ppm1j	6.99006	0.000193974	0.00122466	Up
Gdf3	6.99006	0.000193974	0.00122466	Up
Tmod4	6.99006	0.000193974	0.00122466	Up
Slc5a9	6.99006	0.000193974	0.00122466	Up
Penk	6.97368	1.41507e-16	1.01072e-14	Up
Sorcs1	6.90827	0.000315208	0.0018554	Up
Ccl20	6.90827	0.000315208	0.0018554	Up
Fam131b	6.90827	0.000315208	0.0018554	Up
Rprm	6.85775	9.53487e-21	1.27843e-18	Up
Cyp1b1	6.85641	5.34168e-25	1.27574e-22	Up
Gria4	6.82156	0.000517265	0.00279378	Up
Izumo1r	6.82156	0.000517265	0.00279378	Up
Mmp20	6.82156	0.000517265	0.00279378	Up
Sez6l2	6.82156	0.000517265	0.00279378	Up
Nhs	6.82156	0.000517265	0.00279378	Up
Sult4a1	6.82156	0.000517265	0.00279378	Up
Inhbb	6.79426	2.43404e-20	3.04953e-18	Up
Il1r2	6.78495	2.85542e-20	3.51976e-18	Up
Ece2	6.7293	0.00085757	0.00430334	Up
Neil3	6.7293	0.00085757	0.00430334	Up
Lmo1	6.7293	0.00085757	0.00430334	Up
Ank1	6.7293	0.00085757	0.00430334	Up
Cox6a2	6.7293	0.00085757	0.00430334	Up
Clec4d	6.7293	0.00085757	0.00430334	Up
Kcnk4	6.70931	4.99516e-15	2.70748e-13	Up
Dio3	6.69344	1.06395e-19	1.19577e-17	Up
Defa5	6.68578	0.00085757	0.00430334	Up
Slc5a8	6.63073	0.00143701	0.00657409	Up
Emx2	6.63073	0.00143701	0.00657409	Up
Dpep3	6.63073	0.00143701	0.00657409	Up
Noxo1	6.63073	0.00143701	0.00657409	Up
Mpig6b	6.63073	0.00143701	0.00657409	Up
Siglec15	6.63073	0.00143701	0.00657409	Up
Nat8l	6.63073	0.00143701	0.00657409	Up
Tubg2	6.54456	0.00143701	0.00657409	Up
Grm4	6.52494	0.00143701	0.00657409	Up
Pde9a	6.52494	0.00143701	0.00657409	Up
Serpinb10	6.52494	0.00143701	0.00657409	Up
Mpo	6.52494	0.00143701	0.00657409	Up
Npw	6.52494	0.00143701	0.00657409	Up
Cebpe	6.52494	0.00143701	0.00657409	Up
Slc2a10	6.52494	0.00143701	0.00657409	Up
Mmp27	6.52494	0.00143701	0.00657409	Up
Rhag	6.52494	0.00143701	0.00657409	Up
Kcna6	6.52494	0.00143701	0.00657409	Up
Pacsin1	6.52494	0.00143701	0.00657409	Up
S100a8	6.51675	3.27821e-24	7.05738e-22	Up
Apln	6.43254	4.86393e-18	4.22416e-16	Up
Ptprz1	6.37361	3.7673e-13	1.56052e-11	Up
Cyp26a1	6.33188	1.19492e-32	5.70761e-30	Up
Plet1	6.25038	1.7997e-12	6.66064e-11	Up
Col7a1	6.24172	7.21012e-17	5.51034e-15	Up
Cthrc1	6.1649	1.97013e-16	1.36879e-14	Up
Espl1	6.1436	6.51983e-12	2.19506e-10	Up
Egln3	5.9924	2.65647e-28	9.44283e-26	Up
Vegfd	5.98256	3.78133e-11	1.08327e-09	Up
Cacna1c	5.98256	3.78133e-11	1.08327e-09	Up
P2rx5	5.98256	3.78133e-11	1.08327e-09	Up
Atf3	5.95962	3.36732e-29	1.35446e-26	Up
Ccl7	5.95124	5.68531e-11	1.57143e-09	Up
Duoxa2	5.90295	1.06143e-10	2.79241e-09	Up
Cyp4f18	5.88649	1.31152e-10	3.39773e-09	Up
Tubb3	5.78635	9.55628e-17	7.12526e-15	Up
H1f4	5.74902	1.10861e-22	1.97036e-20	Up
Alox5	5.70384	8.7513e-19	8.62991e-17	Up
Gpr176	5.67275	1.20621e-09	2.55006e-08	Up
Btg2	5.66301	3.70011e-29	1.45016e-26	Up
Inha	5.65342	1.52259e-09	3.17934e-08	Up
Nrg1	5.63396	3.23213e-24	7.05738e-22	Up
Lilrb4	5.59686	3.57088e-22	5.9979e-20	Up
Npy	5.5871	2.75472e-26	8.0973e-24	Up
Col11a1	5.55353	2.24135e-15	1.26885e-13	Up
Cxcl6	5.55269	3.95117e-09	7.60625e-08	Up
S100a9	5.54688	7.07252e-24	1.40394e-21	Up
Spp1	5.53031	1.15849e-26	3.54151e-24	Up
Cdkn1a	5.49172	7.50029e-28	2.49222e-25	Up
Mdga1	5.48505	5.76575e-15	3.11412e-13	Up
Gprc5b	5.47809	1.94146e-18	1.78766e-16	Up
Cldn4	5.47484	2.45278e-21	3.57055e-19	Up
Slc2a3	5.47044	2.65354e-21	3.82635e-19	Up
Dusp8	5.45354	9.37463e-15	4.87385e-13	Up
Mybl2	5.42617	1.62035e-20	2.11388e-18	Up
E2f7	5.42173	1.7719e-08	3.06722e-07	Up
Fos	5.41509	3.10729e-16	2.09229e-14	Up
Gadd45b	5.40924	5.14367e-26	1.40395e-23	Up
Adamts15	5.39624	7.7073e-17	5.861e-15	Up
Tnc	5.37489	8.40757e-18	7.13943e-16	Up
Mmp9	5.36062	2.49802e-19	2.70796e-17	Up
Atp1a3	5.30909	1.36245e-11	4.36583e-10	Up
Krt23	5.27768	6.6409e-08	1.00501e-06	Up
E2f8	5.27768	6.6409e-08	1.00501e-06	Up
Akr1b8	5.21658	4.63974e-20	5.5405e-18	Up
Kcne3	5.18274	3.26929e-13	1.36907e-11	Up
Zap70	5.18042	7.50589e-15	3.9836e-13	Up
Fndc1	5.1465	1.52848e-18	1.46018e-16	Up
Tubb6	5.14472	3.33199e-24	7.07353e-22	Up
Gpx2	5.13299	1.81867e-18	1.69503e-16	Up
S100a11	5.11257	1.54214e-23	2.94646e-21	Up
Trim36	5.06257	1.39864e-12	5.30478e-11	Up
Ch25h	5.05101	4.35031e-14	2.06505e-12	Up
Cxcl1	5.04297	1.73415e-18	1.63621e-16	Up
Vwa2	5.03043	6.39568e-07	7.66128e-06	Up
Clec2d2	5.02448	1.3211e-14	6.73099e-13	Up
St6galnac2	5.00985	1.61239e-15	9.40663e-14	Up
Adgrg3	4.9765	4.0756e-12	1.4126e-10	Up
Adm	4.97063	6.95683e-22	1.10766e-19	Up
Cdh13	4.9662	8.29371e-17	6.21418e-15	Up
Edn1	4.94399	3.73804e-14	1.79109e-12	Up
Lpl	4.93908	2.90885e-23	5.42216e-21	Up
Rgcc	4.90759	1.16267e-09	2.47169e-08	Up
Ptx3	4.90529	1.57716e-06	1.72315e-05	Up
Clec7a	4.88729	2.77454e-20	3.44787e-18	Up
Vcan	4.88039	3.67519e-19	3.87416e-17	Up
Procr	4.86787	1.8452e-20	2.37007e-18	Up
Adamts8	4.8384	2.92973e-06	2.99739e-05	Up
Usp43	4.81231	2.85125e-11	8.44601e-10	Up
Lyz2	4.78727	3.80382e-23	6.84016e-21	Up
Kif12	4.76992	9.75375e-17	7.23719e-15	Up
Nectin4	4.76825	5.52293e-06	5.33278e-05	Up
Vps37d	4.76825	5.52293e-06	5.33278e-05	Up
Prom1	4.76813	3.59505e-16	2.38915e-14	Up
Slc16a3	4.76795	3.11825e-19	3.33304e-17	Up
Mmp12	4.76634	1.03562e-16	7.57392e-15	Up
Plaur	4.74703	3.18257e-18	2.81188e-16	Up
Adamts4	4.71946	2.73746e-15	1.53268e-13	Up
Sgca	4.71149	2.28742e-16	1.56786e-14	Up
Anxa13	4.70886	5.1802e-19	5.34995e-17	Up
Dmbt1	4.70049	1.49392e-22	2.59483e-20	Up
Ppp1r15a	4.7004	9.82718e-22	1.50208e-19	Up
Dhrs9	4.69594	1.13871e-10	2.98546e-09	Up
Thbs1	4.6927	3.85712e-21	5.4589e-19	Up
Pf4	4.68303	1.78611e-18	1.67489e-16	Up
Rin1	4.67978	1.27042e-12	4.83042e-11	Up
Neb	4.66547	1.67587e-08	2.92083e-07	Up
Igfbp2	4.65343	2.21883e-20	2.80287e-18	Up
Id1	4.64885	1.63191e-20	2.11388e-18	Up
Bst1	4.64403	2.33647e-13	1.00317e-11	Up
Anxa2	4.62442	9.30974e-22	1.43737e-19	Up
Sele	4.61682	1.47133e-05	0.000126772	Up
Creb5	4.61682	1.47133e-05	0.000126772	Up
Pdpn	4.59847	3.38731e-10	8.02796e-09	Up
Hmox1	4.59687	7.37004e-22	1.1495e-19	Up
Prkar1b	4.58502	1.49832e-11	4.7712e-10	Up
Mmrn1	4.58435	5.95311e-17	4.61895e-15	Up
Ncam1	4.58399	4.08093e-10	9.49422e-09	Up
Nts	4.58198	3.41702e-08	5.55038e-07	Up
Mmp8	4.57397	1.74641e-11	5.45885e-10	Up
Card14	4.56989	9.7066e-12	3.21137e-10	Up
Vldlr	4.56472	1.56985e-16	1.11195e-14	Up
Cldn5	4.54799	9.92736e-17	7.33042e-15	Up
Cd3d	4.53469	2.88486e-05	0.000231958	Up
Rnd1	4.53143	3.60968e-19	3.83152e-17	Up
Osmr	4.53111	3.79637e-20	4.5691e-18	Up
Grem1	4.51794	1.10768e-12	4.2327e-11	Up
Ccl19	4.49928	1.21665e-17	1.0162e-15	Up
Degs2	4.47835	1.28501e-09	2.70915e-08	Up
F2rl1	4.44761	5.75184e-05	0.000422068	Up
Ccl12	4.44761	5.75184e-05	0.000422068	Up
Stc2	4.44693	1.17191e-07	1.65398e-06	Up
Trim72	4.44693	1.17191e-07	1.65398e-06	Up
Htra3	4.4387	1.98731e-15	1.13768e-13	Up
Tnfaip6	4.4306	2.32572e-09	4.67745e-08	Up
Hcar2	4.41298	6.85244e-16	4.24047e-14	Up
Ddr1	4.40341	1.63792e-17	1.346e-15	Up
Knstrn	4.39786	3.48075e-09	6.75168e-08	Up
Cox4i2	4.38121	3.48075e-09	6.75168e-08	Up
Gpr132	4.34932	3.28061e-07	4.16479e-06	Up
Cryab	4.34457	9.10178e-19	8.91799e-17	Up
Slc1a4	4.33147	1.07302e-18	1.04465e-16	Up
Ptprr	4.32385	4.27064e-07	5.32003e-06	Up
A2m	4.32258	6.76774e-20	7.77781e-18	Up
Brip1	4.30625	0.000116677	0.000787378	Up
Clec10a	4.30578	5.03012e-17	3.92273e-15	Up
Mmp25	4.29792	5.57417e-07	6.77275e-06	Up
S100a6	4.29315	1.14026e-18	1.10309e-16	Up
H1f5	4.29248	1.57593e-10	4.02138e-09	Up
Map3k6	4.27802	1.10679e-15	6.60833e-14	Up
Wnk2	4.27152	5.57417e-07	6.77275e-06	Up
Arhgef16	4.27064	1.82685e-10	4.54779e-09	Up
Col1a1	4.26312	1.74563e-19	1.93347e-17	Up
Ebf1	4.25894	1.50299e-08	2.64363e-07	Up
Lrp8	4.25588	0.000167283	0.0010766	Up
Slc9a5	4.25588	0.000167283	0.0010766	Up
Btnl9	4.25588	0.000167283	0.0010766	Up
Gpnmb	4.25079	2.7826e-19	2.99521e-17	Up
Apold1	4.25039	2.26141e-17	1.84843e-15	Up
Smarcd3	4.24757	4.66412e-13	1.89101e-11	Up
Fstl3	4.22864	6.21627e-13	2.48732e-11	Up
Postn	4.21387	2.42131e-12	8.66738e-11	Up
Cldn11	4.20368	0.000240916	0.0014771	Up
Sphk1	4.20308	4.51453e-10	1.03611e-08	Up
Ect2	4.19594	1.34535e-09	2.82857e-08	Up
Tubb2a	4.1839	2.48667e-18	2.24903e-16	Up
Fblim1	4.17846	4.28584e-16	2.82367e-14	Up
Sfrp1	4.17743	1.3524e-15	7.92008e-14	Up
Liph	4.16807	6.14749e-10	1.38183e-08	Up
Adm2	4.16683	1.94117e-09	3.97732e-08	Up
Serinc2	4.16479	3.60291e-08	5.82757e-07	Up
Prrx1	4.16251	4.62577e-12	1.59605e-10	Up
Cd109	4.15245	2.15025e-11	6.49536e-10	Up
Prlr	4.1496	7.13658e-15	3.82147e-13	Up
Rab44	4.14952	0.000348534	0.00201564	Up
Ube2c	4.14347	5.87869e-13	2.36463e-11	Up
Ccl21	4.14172	6.04041e-18	5.18695e-16	Up
Igfbp1	4.1389	6.70165e-19	6.73913e-17	Up
Wnt7a	4.13173	2.20061e-06	2.32295e-05	Up
Acod1	4.12534	5.64103e-08	8.67435e-07	Up
Plod2	4.12487	8.27622e-17	6.21418e-15	Up
Dcn	4.12274	3.14471e-18	2.81093e-16	Up
Tnfrsf21	4.12108	2.14364e-16	1.4826e-14	Up
Ccn4	4.09325	0.000506526	0.00275525	Up
Rapsn	4.09325	0.000506526	0.00275525	Up
Zscan10	4.09325	0.000506526	0.00275525	Up
Tnfsf18	4.09325	0.000506526	0.00275525	Up
Lum	4.09261	6.66562e-17	5.14565e-15	Up
Aldh1a1	4.08615	2.46866e-18	2.24604e-16	Up
Tmsb10	4.06841	4.43118e-18	3.87032e-16	Up
Osm	4.06406	8.9009e-08	1.30067e-06	Up
Plk1	4.0453	4.06501e-10	9.4716e-09	Up
Ifnlr1	4.0453	4.06501e-10	9.4716e-09	Up
Cldn23	4.0347	0.000739506	0.00381484	Up
Tspan8	4.02591	1.24723e-15	7.3606e-14	Up
Flnc	4.01888	3.5981e-09	6.95284e-08	Up
Egr2	4.01179	1.08088e-08	1.93684e-07	Up
Pcyox1l	4.01179	1.08088e-08	1.93684e-07	Up
Fabp4	4.00648	3.93608e-17	3.1499e-15	Up
Igsf7	4.00633	6.29479e-16	3.99236e-14	Up
Clec12a	4.00003	1.47258e-13	6.50532e-12	Up
Pmaip1	3.99645	4.03123e-11	1.14744e-09	Up
Trim59	3.99415	5.5696e-12	1.89602e-10	Up
Blnk	3.98909	2.61529e-13	1.11737e-11	Up
Shc2	3.97868	1.60831e-08	2.8127e-07	Up
Mmp7	3.97367	0.00108459	0.00523955	Up
Gjb3	3.97367	0.00108459	0.00523955	Up
Mybl1	3.97159	6.93123e-16	4.27193e-14	Up
Timp1	3.97058	2.15716e-16	1.48523e-14	Up
Agtpbp1	3.96143	6.69018e-16	4.16556e-14	Up
Aqp7	3.95542	7.41294e-13	2.94303e-11	Up
Serpinb1a	3.94262	1.21787e-15	7.21517e-14	Up
Gpat3	3.93857	2.60987e-14	1.291e-12	Up
Angpt2	3.93807	8.37165e-09	1.53246e-07	Up
Adap1	3.92587	2.8846e-11	8.5118e-10	Up
Ptgs2	3.92186	1.54063e-09	3.21263e-08	Up
Tmbim1	3.91187	3.28249e-16	2.20057e-14	Up
Sema7a	3.9101	4.19832e-10	9.73769e-09	Up
Cilp	3.91004	1.25995e-05	0.000112022	Up
Atp5me	3.90995	0.000376589	0.00214382	Up
Pnoc	3.90995	0.000376589	0.00214382	Up
Anxa8	3.90054	8.92666e-13	3.48962e-11	Up
Klf6	3.89463	4.9289e-17	3.8635e-15	Up
Trpv4	3.88666	4.68596e-07	5.79959e-06	Up
Aurkb	3.88317	1.54279e-10	3.95664e-09	Up
Esm1	3.8763	1.20214e-12	4.58223e-11	Up
Ackr3	3.87367	1.1599e-15	6.8985e-14	Up
Kng1	3.86474	4.36574e-17	3.45753e-15	Up
Pcolce	3.86466	1.57135e-16	1.11195e-14	Up
Pdk4	3.86227	7.08665e-17	5.44319e-15	Up
Nhej1	3.84581	2.4791e-14	1.23029e-12	Up
Vwa7	3.84563	2.31155e-05	0.00019047	Up
Spire2	3.84327	0.000376589	0.00214382	Up
Slc38a5	3.84327	0.000376589	0.00214382	Up
Rgs1	3.84304	1.27528e-11	4.11238e-10	Up
Mmp2	3.84258	1.95986e-16	1.36787e-14	Up
Krt7	3.83868	7.6806e-07	8.99601e-06	Up
Ndufa4l2	3.83806	5.50009e-08	8.52626e-07	Up
Sulf1	3.8293	2.70013e-13	1.14643e-11	Up
Klf4	3.82588	1.95822e-15	1.12524e-13	Up
Spon1	3.81425	2.02659e-13	8.80013e-12	Up
Rgs2	3.81403	6.06421e-15	3.26379e-13	Up
Cd80	3.81149	2.02364e-11	6.16162e-10	Up
Rbpjl	3.80767	3.42912e-08	5.56412e-07	Up
Dapk1	3.80153	5.44007e-16	3.49376e-14	Up
Loxl1	3.7969	2.74933e-14	1.3556e-12	Up
Hebp2	3.79526	5.35498e-11	1.49091e-09	Up
Pkm	3.79437	2.62284e-16	1.78973e-14	Up
Scara5	3.78905	1.27052e-06	1.41338e-05	Up
Csf3r	3.77924	2.94567e-11	8.64196e-10	Up
Steap2	3.77747	1.84413e-10	4.57591e-09	Up
Adamtsl1	3.77337	0.000575412	0.00306987	Up
Irx3	3.77337	0.000575412	0.00306987	Up
Fam169a	3.77337	0.000575412	0.00306987	Up
Rab37	3.77337	0.000575412	0.00306987	Up
Pthlh	3.77337	0.000575412	0.00306987	Up
Lgals3	3.76652	5.0956e-16	3.28634e-14	Up
Ace	3.76517	2.86872e-13	1.21128e-11	Up
Cd248	3.765	9.56443e-12	3.1712e-10	Up
Fjx1	3.76358	1.63986e-06	1.77139e-05	Up
Gbp4	3.76113	7.15041e-15	3.82147e-13	Up
Pla2g2a	3.75942	1.86994e-11	5.80935e-10	Up
Sctr	3.75925	5.62142e-12	1.90941e-10	Up
Plat	3.75406	1.7656e-15	1.01838e-13	Up
Runx1	3.75243	8.90179e-11	2.38708e-09	Up
Bmal1	3.75132	7.69422e-13	3.04679e-11	Up
S100a10	3.7468	6.40429e-16	4.04502e-14	Up
Cd24	3.74557	5.85053e-14	2.72638e-12	Up
Cd55	3.74267	1.60369e-07	2.20039e-06	Up
Rhd	3.74267	1.60369e-07	2.20039e-06	Up
Clcf1	3.7363	4.30265e-13	1.76316e-11	Up
Cst6	3.71125	2.12165e-06	2.25518e-05	Up
Srxn1	3.70038	4.97448e-12	1.70865e-10	Up
Kcnv2	3.69991	0.000884859	0.00440413	Up
Chrdl2	3.69991	0.000884859	0.00440413	Up
Ffar2	3.69991	0.000884859	0.00440413	Up
Trat1	3.69991	0.000884859	0.00440413	Up
Camk2b	3.69991	0.000884859	0.00440413	Up
Ndrg1	3.68935	4.10288e-15	2.24776e-13	Up
Slc4a3	3.68435	2.75169e-06	2.83611e-05	Up
Cldn6	3.68224	2.49091e-07	3.25693e-06	Up
Adgrg1	3.67392	2.22547e-13	9.58208e-12	Up
Alox15	3.66588	3.10294e-14	1.51528e-12	Up
Eno2	3.65777	7.10097e-13	2.8339e-11	Up
Sgcb	3.65614	5.61833e-14	2.62618e-12	Up
Cyp26b1	3.65456	4.49792e-13	1.83335e-11	Up
Htr2b	3.64798	8.09767e-05	0.000570645	Up
Mgp	3.64758	2.12238e-15	1.20597e-13	Up
Gfpt2	3.64003	1.50711e-11	4.78924e-10	Up
Arhgef39	3.63621	1.74269e-07	2.3531e-06	Up
Gcnt3	3.63395	2.3511e-12	8.49565e-11	Up
Cd84	3.63103	1.03065e-08	1.85554e-07	Up
Ddit4	3.62993	4.58215e-15	2.50136e-13	Up
Arhgef28	3.62901	4.66319e-06	4.58077e-05	Up
Fbln1	3.62472	1.3432e-11	4.31319e-10	Up
F13a1	3.62359	3.88799e-08	6.26217e-07	Up
Col17a1	3.6225	0.00136958	0.00638425	Up
Chst5	3.6225	0.00136958	0.00638425	Up
Gata1	3.6225	0.00136958	0.00638425	Up
Des	3.61143	4.07422e-14	1.94608e-12	Up
Cldn7	3.60777	5.42004e-10	1.22916e-08	Up
Lilrb2	3.60025	6.24488e-10	1.40166e-08	Up
Bub1b	3.59571	9.49516e-08	1.37698e-06	Up
B3galnt1	3.59059	2.87807e-11	8.50895e-10	Up
Prc1	3.58254	3.42244e-12	1.21093e-10	Up
Gjc2	3.57804	1.16078e-07	1.64893e-06	Up
Nr4a3	3.57555	7.73676e-07	9.04101e-06	Up
C1qtnf6	3.57533	2.59723e-11	7.76882e-10	Up
Notch3	3.57191	1.80148e-11	5.61952e-10	Up
Stap1	3.57146	7.9832e-06	7.41783e-05	Up
C1qtnf2	3.5706	5.77232e-09	1.08792e-07	Up
Chst11	3.56344	0.000154712	0.00100714	Up
Dusp10	3.56189	1.06149e-12	4.09719e-11	Up
Sfn	3.56134	4.32874e-10	1.0025e-08	Up
Il1rl1	3.55929	6.66806e-09	1.23992e-07	Up
Vwa1	3.54864	5.60479e-14	2.62618e-12	Up
Gal3st4	3.54071	0.00213372	0.00924953	Up
Adgrd1	3.54071	0.00213372	0.00924953	Up
Ggt1	3.53558	3.13407e-13	1.31605e-11	Up
Dusp4	3.53445	1.11132e-07	1.58605e-06	Up
Trem1	3.53445	1.11132e-07	1.58605e-06	Up
Grhl1	3.53383	1.32699e-09	2.79382e-08	Up
Rab7b	3.52762	3.20034e-11	9.33534e-10	Up
Cdk1	3.52367	1.16744e-10	3.05554e-09	Up
Itgb4	3.52353	4.41975e-13	1.80631e-11	Up
Adamts5	3.51318	1.03281e-08	1.85724e-07	Up
Tm4sf19	3.51152	1.38101e-05	0.00012028	Up
Aloxe3	3.48629	2.63265e-07	3.41597e-06	Up
Cd6	3.48629	2.63265e-07	3.41597e-06	Up
Sox4	3.48433	1.80581e-11	5.62155e-10	Up
Fhl2	3.48313	1.07643e-12	4.13396e-11	Up
Cst7	3.47358	2.6514e-09	5.27004e-08	Up
Evc2	3.46034	1.98414e-06	2.11637e-05	Up
Basp1	3.45686	3.13255e-13	1.31605e-11	Up
Cpt1c	3.44981	1.70561e-10	4.2738e-09	Up
Kitlg	3.44934	1.09499e-12	4.19473e-11	Up
Kif3c	3.44898	1.82365e-05	0.000154686	Up
Diaph3	3.44212	3.56543e-09	6.89842e-08	Up
Ka11	3.43656	9.34256e-13	3.63361e-11	Up
Sat1	3.43306	3.11741e-14	1.5175e-12	Up
Cd9	3.43057	9.37557e-13	3.6372e-11	Up
Cdh3	3.42874	2.53347e-08	4.22752e-07	Up
Col5a3	3.42829	4.94727e-07	6.0983e-06	Up
Ddit4l	3.42656	0.000299755	0.00178001	Up
Tmprss4	3.42656	0.000299755	0.00178001	Up
H4f3	3.42548	1.7421e-12	6.49463e-11	Up
Slc39a6	3.42246	2.62477e-13	1.11754e-11	Up
Sox9	3.42173	1.78043e-10	4.44672e-09	Up
Lpar1	3.41666	2.41467e-05	0.000198112	Up
Egr1	3.41492	7.74223e-14	3.51157e-12	Up
Hk2	3.41248	1.51326e-11	4.7988e-10	Up
Actg2	3.38891	8.87585e-11	2.38431e-09	Up
Fosb	3.3883	7.59611e-07	8.90388e-06	Up
Ppp1r1b	3.3801	1.81173e-08	3.12553e-07	Up
Abcg4	3.37789	0.000419448	0.00235017	Up
Trim46	3.37789	0.000419448	0.00235017	Up
Cdkn2b	3.37572	1.38454e-07	1.92914e-06	Up
Ncf2	3.37305	1.56246e-10	3.99369e-09	Up
Dio2	3.37244	4.81783e-07	5.95798e-06	Up
Jun	3.37093	7.64751e-14	3.47893e-12	Up
Gpx3	3.3676	1.37961e-13	6.12728e-12	Up
Mcam	3.36722	8.6831e-13	3.42065e-11	Up
Emb	3.35399	1.44436e-11	4.60899e-10	Up
Prag1	3.35222	6.41101e-08	9.75047e-07	Up
Cenpf	3.34537	2.41601e-08	4.06256e-07	Up
Lpcat4	3.33774	7.03988e-07	8.3479e-06	Up
A3galt2	3.33651	3.14693e-09	6.18263e-08	Up
Lilrb3a	3.33578	5.14021e-10	1.17091e-08	Up
Chi3l1	3.33177	8.09067e-10	1.77426e-08	Up
Il2rg	3.33029	1.97854e-11	6.07268e-10	Up
Top2a	3.33029	1.97854e-11	6.07268e-10	Up
Npas2	3.32614	1.17426e-06	1.31684e-05	Up
Pclaf	3.32614	1.17426e-06	1.31684e-05	Up
Chst1	3.32578	7.50757e-08	1.11736e-06	Up
Kdelr3	3.32195	3.04808e-11	8.9082e-10	Up
Rhob	3.32026	1.85815e-13	8.09169e-12	Up
Rec8	3.31512	5.69854e-05	0.000419548	Up
Begain	3.30872	6.74687e-06	6.38551e-05	Up
Pdk3	3.30746	9.54316e-10	2.05737e-08	Up
Stx11	3.30028	2.76157e-07	3.56208e-06	Up
Lgals1	3.29312	3.98919e-12	1.39212e-10	Up
Gadd45a	3.28762	3.39378e-13	1.41732e-11	Up
Svep1	3.28744	2.81067e-10	6.7869e-09	Up
Thy1	3.28588	2.00616e-08	3.41091e-07	Up
Abcc3	3.2799	7.43986e-12	2.4993e-10	Up
Ccr6	3.27962	7.62932e-05	0.000541133	Up
Robo3	3.27962	7.62932e-05	0.000541133	Up
Impdh1	3.2774	1.62596e-11	5.11374e-10	Up
Ccnb1	3.27712	1.23456e-08	2.19933e-07	Up
Slc6a6	3.27573	9.40017e-13	3.63751e-11	Up
Prg2	3.27532	0.000829981	0.00420099	Up
Unc79	3.27532	0.000829981	0.00420099	Up
Exo1	3.27532	0.000829981	0.00420099	Up
Anln	3.27282	5.33986e-10	1.21278e-08	Up
Wnt4	3.27201	2.41621e-09	4.84033e-08	Up
Isg20	3.26894	5.56552e-12	1.89602e-10	Up
Tnfrsf12a	3.26887	1.65508e-12	6.21571e-11	Up
Myb	3.26118	2.28665e-06	2.40879e-05	Up
Msln	3.26076	4.48596e-10	1.0311e-08	Up
Hilpda	3.25898	1.79927e-12	6.66064e-11	Up
Maff	3.25878	1.85952e-12	6.86541e-11	Up
C7	3.25431	7.19035e-13	2.8621e-11	Up
Ccl3	3.24847	6.78385e-08	1.02462e-06	Up
Bok	3.24759	1.2467e-10	3.2463e-09	Up
Cd28	3.24713	1.52712e-06	1.67206e-05	Up
Ndc80	3.23695	5.60705e-07	6.80188e-06	Up
Gnat1	3.22857	5.65386e-10	1.27839e-08	Up
Itga11	3.22648	1.44331e-05	0.00012485	Up
Ifit1	3.22116	0.0011736	0.00560228	Up
Ckap4	3.21902	4.88778e-12	1.68265e-10	Up
Stil	3.2149	2.32806e-07	3.07027e-06	Up
Jund	3.2145	8.77359e-13	3.44741e-11	Up
Clip3	3.21431	4.51202e-08	7.10259e-07	Up
S100a4	3.20916	6.07479e-11	1.67303e-09	Up
Skap1	3.20589	0.000102431	0.000704302	Up
Traip	3.20589	0.000102431	0.000704302	Up
Pfn2	3.20566	8.4165e-09	1.53763e-07	Up
Nr4a1	3.20563	4.41667e-10	1.01823e-08	Up
Il2ra	3.20422	8.04485e-07	9.37237e-06	Up
Fas	3.2035	1.21907e-11	3.95615e-10	Up
Dcdc2	3.2034	1.74036e-09	3.61432e-08	Up
Irs2	3.19593	1.89936e-12	6.9956e-11	Up
Unc5b	3.19377	2.26572e-11	6.80384e-10	Up
Bmx	3.19316	4.52551e-06	4.45986e-05	Up
Pvr	3.19044	1.22327e-11	3.96137e-10	Up
Gdpd5	3.18934	1.04884e-09	2.24846e-08	Up
Heph	3.18239	7.81849e-10	1.71951e-08	Up
B3gnt7	3.17954	4.46475e-09	8.53046e-08	Up
Nrarp	3.17194	1.16935e-08	2.08803e-07	Up
Gpc1	3.16893	2.42341e-05	0.000198616	Up
Rtkn	3.16854	3.18491e-07	4.05678e-06	Up
Dynlt1	3.16757	5.68162e-11	1.57143e-09	Up
Lamb1	3.16184	8.45833e-12	2.81849e-10	Up
Fzd2	3.16176	4.17206e-08	6.6427e-07	Up
Trpv2	3.15533	3.94972e-10	9.2311e-09	Up
Mrc2	3.15467	4.85248e-10	1.10867e-08	Up
Tox3	3.15046	4.14607e-06	4.11244e-05	Up
Mtmr11	3.13989	7.35335e-10	1.62893e-08	Up
Ap1m2	3.13927	3.15106e-05	0.000248652	Up
Rhoj	3.13847	5.18808e-11	1.45074e-09	Up
Cxcl10	3.13296	3.62359e-11	1.04899e-09	Up
Ccng1	3.13276	2.11768e-12	7.68852e-11	Up
Hdc	3.12872	2.70415e-10	6.54002e-09	Up
Col4a1	3.11911	3.07044e-12	1.09143e-10	Up
Megf6	3.11445	4.9024e-09	9.29692e-08	Up
Selenom	3.11389	3.34003e-10	7.93972e-09	Up
Cd44	3.10677	4.79033e-11	1.34596e-09	Up
Elf3	3.10419	7.76592e-09	1.43187e-07	Up
Fscn1	3.09943	7.77248e-11	2.11017e-09	Up
Acp3	3.0954	2.07305e-10	5.1025e-09	Up
Smox	3.0943	2.00836e-11	6.1353e-10	Up
Racgap1	3.09305	2.86787e-08	4.73385e-07	Up
Matn4	3.08771	0.000252157	0.00153371	Up
Klf5	3.08341	2.44521e-06	2.55993e-05	Up
Col12a1	3.0816	9.81761e-11	2.61432e-09	Up
Tagln	3.08116	1.06275e-11	3.49336e-10	Up
Bex3	3.07632	2.06401e-10	5.08844e-09	Up
Rgma	3.06816	7.67894e-06	7.18315e-05	Up
Bbc3	3.06595	1.31115e-11	4.21914e-10	Up
Ttk	3.06313	1.07177e-06	1.21981e-05	Up
Plscr1	3.05475	6.75837e-10	1.51247e-08	Up
Vim	3.04975	8.55715e-12	2.84339e-10	Up
Adra2a	3.04606	0.000342416	0.00198703	Up
Ppp2r2c	3.04606	0.000342416	0.00198703	Up
Gpihbp1	3.04606	0.000342416	0.00198703	Up
Capg	3.04576	2.57076e-11	7.70472e-10	Up
Cpe	3.0386	3.36959e-08	5.485e-07	Up
Pfkfb3	3.03843	1.34828e-09	2.83084e-08	Up
Ampd3	3.03603	3.52472e-09	6.82831e-08	Up
Zfp36l2	3.0315	1.21187e-11	3.94117e-10	Up
Gpr183	3.02711	1.02536e-07	1.46885e-06	Up
Myof	3.02557	1.28642e-10	3.34403e-09	Up
Cav1	3.02371	8.47257e-11	2.29209e-09	Up
Dpep2	3.02338	1.71179e-07	2.31956e-06	Up
Pitpnm3	3.02075	1.86467e-05	0.000157903	Up
Anks6	3.0143	1.81721e-06	1.95057e-05	Up
Plxdc2	3.01137	6.18246e-09	1.15524e-07	Up
Pkia	3.00323	9.54336e-09	1.72423e-07	Up
Htr7	3.00317	0.000466301	0.00257493	Up
Bdkrb2	3.00317	0.000466301	0.00257493	Up
Rhoc	2.99549	4.01948e-11	1.14623e-09	Up
Pik3ip1	2.99422	2.76905e-09	5.48962e-08	Up
Kif23	2.98074	4.93221e-07	6.08465e-06	Up
Ncf1	2.97565	4.73729e-11	1.33553e-09	Up
Hs3st1	2.97544	1.69094e-07	2.29743e-06	Up
Nsg1	2.96745	2.37703e-05	0.000195443	Up
Il17rd	2.96709	5.75792e-07	6.96831e-06	Up
Prdm1	2.9669	1.98961e-08	3.40551e-07	Up
Gpx8	2.96255	2.75571e-08	4.5734e-07	Up
Orm1	2.96102	2.01098e-11	6.1353e-10	Up
Dnm1	2.95999	2.17752e-08	3.67773e-07	Up
Cyp1a1	2.95956	7.97982e-10	1.75247e-08	Up
Hmcn2	2.95897	0.000636793	0.00336213	Up
Asns	2.9589	1.80173e-09	3.71236e-08	Up
Rhov	2.94723	0.000121298	0.000811394	Up
Cep72	2.94723	0.000121298	0.000811394	Up
Tnfrsf9	2.94248	2.32138e-10	5.6681e-09	Up
Slc4a5	2.94004	3.03616e-05	0.000241479	Up
Fcnb	2.93938	7.86746e-07	9.18672e-06	Up
Adam19	2.93654	1.01485e-09	2.18171e-08	Up
Slc27a3	2.93505	4.64302e-09	8.84894e-08	Up
Kifc1	2.93439	5.2477e-08	8.16905e-07	Up
Socs3	2.9339	8.19084e-11	2.21981e-09	Up
Kcnn4	2.92977	1.04378e-07	1.49384e-06	Up
Cd63	2.92818	4.05294e-11	1.15147e-09	Up
Coro1a	2.92359	1.60578e-10	4.09072e-09	Up
Dbn1	2.92309	1.39521e-09	2.92536e-08	Up
Fkbp10	2.91951	1.20004e-09	2.54052e-08	Up
Pim1	2.91564	8.32949e-10	1.8188e-08	Up
Ackr1	2.91259	0.000159961	0.00103689	Up
Iqgap3	2.91076	8.40505e-08	1.2353e-06	Up
Slc1a5	2.90376	2.95987e-08	4.86469e-07	Up
Fosl2	2.90317	2.05252e-10	5.06829e-09	Up
Flrt2	2.89314	2.14597e-09	4.36185e-08	Up
Dusp2	2.89113	1.41028e-05	0.000122548	Up
Thbs4	2.88695	7.4833e-07	8.79864e-06	Up
Ppp2r3b	2.88446	5.38341e-06	5.22447e-05	Up
Ccnb2	2.88425	9.56563e-08	1.38457e-06	Up
Wt1	2.88362	4.98313e-05	0.00037191	Up
Wnt5a	2.88362	4.98313e-05	0.00037191	Up
Gabrp	2.88362	4.98313e-05	0.00037191	Up
Map4k4	2.88181	1.84072e-10	4.57486e-09	Up
Slc25a29	2.876	2.23786e-10	5.49931e-09	Up
Stk39	2.87537	6.47742e-06	6.17253e-05	Up
Castor1	2.87537	9.76052e-09	1.76139e-07	Up
Cldn1	2.87095	2.83817e-10	6.84249e-09	Up
Sncaip	2.87041	1.41028e-05	0.000122548	Up
Itgax	2.86924	4.12712e-09	7.93497e-08	Up
Aebp1	2.8692	1.62607e-10	4.13551e-09	Up
Lpar4	2.86629	0.00119746	0.00568243	Up
Mfap2	2.86629	0.00119746	0.00568243	Up
Sh3tc2	2.8638	4.24015e-05	0.000325518	Up
Aldoa	2.85065	9.59093e-11	2.55842e-09	Up
Gtse1	2.84308	1.14129e-09	2.43299e-08	Up
Galnt12	2.8392	5.28572e-05	0.000392005	Up
Osbpl10	2.8392	5.28572e-05	0.000392005	Up
Plin2	2.83454	1.20017e-10	3.13047e-09	Up
Relb	2.83049	9.02094e-09	1.63759e-07	Up
Krt20	2.82876	1.76711e-07	2.37767e-06	Up
Tpm2	2.82671	7.17023e-10	1.59298e-08	Up
Tff3	2.8249	8.24462e-05	0.000578898	Up
Cdh23	2.81762	0.00119746	0.00568243	Up
Ptger2	2.81762	0.00119746	0.00568243	Up
Nid2	2.8175	1.09108e-09	2.33248e-08	Up
Kif18b	2.81719	1.35156e-06	1.49809e-05	Up
Dkk3	2.81488	3.1676e-09	6.20727e-08	Up
Ephb3	2.813	4.58839e-06	4.51601e-05	Up
Col8a1	2.81151	5.87107e-08	8.96497e-07	Up
Trim24	2.81125	7.04505e-10	1.56973e-08	Up
Mef2c	2.80766	2.84122e-06	2.92051e-05	Up
Gpc3	2.80584	1.81879e-07	2.44075e-06	Up
Cygb	2.80229	4.40008e-10	1.01594e-08	Up
Zfp382	2.79461	0.000106371	0.000727135	Up
Gja5	2.79146	4.88212e-07	6.0326e-06	Up
Mki67	2.7872	5.79346e-09	1.09055e-07	Up
Clic5	2.78636	2.59093e-08	4.31398e-07	Up
Aldh3b1	2.77783	2.53629e-07	3.30778e-06	Up
Scd2	2.77707	5.55733e-10	1.25843e-08	Up
Kctd15	2.77668	3.3496e-06	3.39373e-05	Up
Jag2	2.77363	2.31191e-06	2.43371e-05	Up
Anxa1	2.77233	1.41676e-09	2.96646e-08	Up
Ier5	2.77029	7.10827e-10	1.58151e-08	Up
Ccdc88c	2.77007	3.2087e-08	5.23985e-07	Up
Tnnc2	2.76724	0.0016487	0.00740316	Up
Treml1	2.76724	0.0016487	0.00740316	Up
Cdc7	2.76503	0.000372105	0.0021286	Up
Cenpw	2.76277	0.000103342	0.000709925	Up
Slc5a1	2.75979	3.17279e-07	4.04809e-06	Up
Slit3	2.75918	5.19686e-08	8.12209e-07	Up
Cxcr4	2.75193	3.21899e-09	6.29991e-08	Up
Ldhb	2.74954	2.45738e-08	4.11402e-07	Up
Boc	2.74621	2.51028e-06	2.62267e-05	Up
Clspn	2.74177	2.01462e-05	0.000168455	Up
Il17re	2.73637	5.81712e-05	0.000426245	Up
Pmp22	2.73125	8.59305e-09	1.56736e-07	Up
Depdc1b	2.72566	0.000495363	0.00271093	Up
Stx1a	2.72566	0.000495363	0.00271093	Up
Chrm3	2.72566	0.000495363	0.00271093	Up
Nuf2	2.71699	1.02493e-06	1.17086e-05	Up
Anxa5	2.71567	9.01323e-10	1.9625e-08	Up
Slc2a1	2.71508	1.06914e-09	2.28876e-08	Up
Cldn8	2.71505	0.00227587	0.00978252	Up
Sell	2.70824	5.52915e-08	8.56261e-07	Up
Uhrf1	2.70269	3.42557e-07	4.33084e-06	Up
Cdca5	2.70121	2.96899e-05	0.000237721	Up
Ica1	2.69764	2.82519e-08	4.67348e-07	Up
Rgs10	2.69662	1.68052e-08	2.92559e-07	Up
F2r	2.6953	1.04388e-08	1.87494e-07	Up
Rap1gap	2.69438	3.78613e-07	4.75522e-06	Up
Dlgap1	2.69302	5.93391e-05	0.000433348	Up
Arhgap11a	2.69177	3.48201e-08	5.63798e-07	Up
Aspn	2.6904	1.87129e-06	2.00298e-05	Up
Mdm2	2.68544	1.0243e-09	2.19894e-08	Up
Il10	2.68518	0.000660977	0.00346113	Up
Ska1	2.68518	0.000660977	0.00346113	Up
Tgif1	2.68248	1.78898e-09	3.69521e-08	Up
Ankrd1	2.68049	2.96899e-05	0.000237721	Up
Sgo1	2.68049	2.96899e-05	0.000237721	Up
Hba-a1	2.68037	8.22937e-10	1.80209e-08	Up
Thsd1	2.67682	5.61836e-08	8.65692e-07	Up
Celsr1	2.67064	1.59963e-05	0.000137207	Up
Dclk1	2.6677	1.42464e-07	1.9778e-06	Up
Tmem107	2.6667	0.000231229	0.00142801	Up
Entpd2	2.66182	3.28409e-09	6.41089e-08	Up
Clec3b	2.65899	9.72785e-07	1.11378e-05	Up
Hba-a3	2.65872	2.10493e-09	4.29557e-08	Up
Gstp1	2.65596	1.89443e-09	3.89198e-08	Up
Gria3	2.647	3.92854e-09	7.57223e-08	Up
RT1-DMa	2.64338	2.41181e-09	4.83786e-08	Up
Prss8	2.64304	3.94609e-07	4.93989e-06	Up
Cd34	2.63943	1.1688e-07	1.65265e-06	Up
Dok4	2.63848	1.93025e-06	2.0632e-05	Up
Trip10	2.63795	3.31115e-09	6.45548e-08	Up
Parm1	2.63644	3.10674e-07	3.97045e-06	Up
Col4a2	2.63121	2.09393e-09	4.27885e-08	Up
Pigy	2.62758	1.01245e-06	1.15747e-05	Up
Ipcef1	2.62564	0.000118807	0.000799281	Up
Kcnd1	2.62044	0.000112106	0.000761575	Up
Ncaph	2.6165	5.36019e-05	0.00039695	Up
Eif5a2	2.61342	2.77615e-05	0.000224279	Up
Tagln2	2.61261	2.51329e-09	5.00856e-08	Up
Pttg1	2.60891	9.01951e-06	8.2751e-05	Up
Kcnq1	2.60891	9.01951e-06	8.2751e-05	Up
RT1-Bb	2.60796	3.04062e-09	6.0124e-08	Up
Slc7a1	2.60759	7.27583e-07	8.59437e-06	Up
Rab25	2.60721	1.00955e-05	9.14158e-05	Up
Fbln2	2.60367	1.05388e-07	1.50688e-06	Up
Chpf	2.60191	3.90847e-08	6.28853e-07	Up
Cx3cl1	2.60094	1.69389e-06	1.8246e-05	Up
Osr1	2.60064	0.00118483	0.00564179	Up
S1pr5	2.60064	0.00118483	0.00564179	Up
Ldb2	2.5954	1.90226e-07	2.53939e-06	Up
Ehd4	2.59318	7.66162e-09	1.41435e-07	Up
Trip6	2.59216	1.26695e-08	2.25179e-07	Up
Hmmr	2.59089	1.39734e-06	1.54435e-05	Up
Slc25a4	2.58751	6.77731e-09	1.2587e-07	Up
Ltbp2	2.58202	6.45103e-08	9.80159e-07	Up
Sarm1	2.57949	2.44516e-08	4.10256e-07	Up
Mfap4	2.57609	8.41999e-09	1.53763e-07	Up
Cotl1	2.57542	6.12786e-09	1.14644e-07	Up
Lgals2	2.57287	2.52242e-07	3.2925e-06	Up
Pfkp	2.57287	2.52242e-07	3.2925e-06	Up
Pde5a	2.5722	7.99597e-05	0.000564259	Up
Cenpt	2.5722	7.99597e-05	0.000564259	Up
Obsl1	2.57102	2.37486e-06	2.49826e-05	Up
Rhbdf2	2.56906	1.98943e-08	3.40551e-07	Up
Nck2	2.56787	9.78082e-08	1.41038e-06	Up
P2rx1	2.56692	0.00019293	0.0012242	Up
Muc1	2.56686	6.53668e-07	7.79354e-06	Up
Il18rap	2.56611	6.31866e-06	6.04007e-05	Up
Cenpe	2.56242	1.59378e-05	0.000136782	Up
Rsad2	2.5609	1.71395e-07	2.32043e-06	Up
Spc24	2.56014	8.48825e-07	9.82156e-06	Up
Podxl	2.55153	1.6865e-08	2.93267e-07	Up
Cx3cr1	2.55093	7.89688e-07	9.21403e-06	Up
Efemp2	2.5491	5.05261e-08	7.92907e-07	Up
Fzd6	2.5426	6.30298e-08	9.59573e-07	Up
Erbb2	2.54061	8.33773e-06	7.67724e-05	Up
Pou2f1	2.53892	3.10494e-05	0.00024552	Up
Ssc5d	2.53892	3.10494e-05	0.00024552	Up
Tnfrsf4	2.53892	3.10494e-05	0.00024552	Up
Sgo2	2.53642	0.00159155	0.00719515	Up
Cxcr2	2.53616	1.31723e-05	0.000115845	Up
Mmp23	2.53482	9.55206e-07	1.0953e-05	Up
Rtn4	2.53354	9.04078e-09	1.63925e-07	Up
Rab13	2.53308	1.18506e-08	2.1136e-07	Up
Tlr5	2.53177	2.16902e-05	0.000179596	Up
Pstpip1	2.5303	8.95231e-08	1.30693e-06	Up
Pla1a	2.52921	1.6683e-08	2.91096e-07	Up
Dab2	2.52697	9.15261e-09	1.65756e-07	Up
Tpm4	2.52588	7.28632e-09	1.34669e-07	Up
Mthfd2	2.51948	8.30307e-07	9.63648e-06	Up
Cacna1h	2.5176	0.000266845	0.00161278	Up
Rrm2	2.51709	1.35031e-07	1.88661e-06	Up
Tgm7	2.5162	2.16902e-05	0.000179596	Up
Kif26a	2.51323	9.58679e-06	8.71707e-05	Up
Lrrc1	2.51085	0.00214237	0.00927651	Up
Ccl17	2.51085	0.00214237	0.00927651	Up
Ptp4a3	2.50482	1.71128e-07	2.31956e-06	Up
Cyfip2	2.50127	1.14867e-07	1.63324e-06	Up
Septin5	2.49716	8.00269e-06	7.42691e-05	Up
Bax	2.49301	1.43269e-08	2.53163e-07	Up
Chp2	2.49272	1.76869e-05	0.000150442	Up
Plekhg1	2.49229	2.44221e-05	0.000199785	Up
Ctsw	2.48899	0.000877744	0.00439015	Up
Gpr39	2.4868	9.36399e-08	1.36183e-06	Up
Slc10a6	2.48622	3.68117e-07	4.63481e-06	Up
Kif2c	2.47931	0.000147018	0.000964865	Up
Hjurp	2.47462	2.8824e-07	3.70855e-06	Up
Srpx2	2.4741	0.000315485	0.0018554	Up
Gjc1	2.47226	1.4629e-05	0.00012633	Up
Atp6v1d	2.46627	1.38451e-08	2.45218e-07	Up
Galnt15	2.4633	0.000332559	0.00194236	Up
Il21r	2.46295	8.00269e-06	7.42691e-05	Up
St14	2.45836	9.44739e-08	1.37135e-06	Up
Trpm4	2.45659	1.45682e-07	2.01698e-06	Up
Rcn1	2.45564	2.85516e-08	4.71796e-07	Up
Itgb8	2.45512	0.000180546	0.00115225	Up
Actg1	2.45224	1.46334e-08	2.57983e-07	Up
Acot9	2.45147	1.33298e-07	1.8658e-06	Up
Ager	2.45066	0.000877744	0.00439015	Up
Numbl	2.44979	4.67156e-06	4.58311e-05	Up
Cd72	2.44595	0.000660415	0.00346113	Up
Cxcl16	2.44581	5.41067e-08	8.39616e-07	Up
Spdl1	2.44497	2.76395e-06	2.84683e-05	Up
Acta2	2.44327	3.60732e-08	5.82853e-07	Up
Gxylt2	2.44178	0.000404469	0.00228214	Up
Itk	2.44178	0.000404469	0.00228214	Up
Vwf	2.44145	3.19499e-08	5.22303e-07	Up
Macroh2a2	2.43838	0.0014361	0.00657409	Up
Dlgap5	2.43586	7.84213e-06	7.31342e-05	Up
Kcnj16	2.43537	0.000415	0.00233037	Up
Gmds	2.43537	0.000415	0.00233037	Up
Gpr34	2.43537	0.000415	0.00233037	Up
Ptgis	2.43486	1.85362e-07	2.48096e-06	Up
Dennd2c	2.43129	4.38172e-07	5.44951e-06	Up
Igfbp5	2.42886	6.1702e-07	7.41992e-06	Up
Nsl1	2.42672	0.000126706	0.000844985	Up
Chn1	2.42367	7.64132e-05	0.000541733	Up
Smoc2	2.42149	1.96381e-07	2.6147e-06	Up
Ccn2	2.41888	4.3153e-08	6.84936e-07	Up
Tspo	2.41638	6.1919e-08	9.44543e-07	Up
Ptgds	2.41128	0.00115274	0.00551994	Up
Ccna2	2.40858	2.93981e-07	3.77923e-06	Up
Rbp2	2.40549	0.000273264	0.00164767	Up
Grk5	2.40537	4.62359e-07	5.73168e-06	Up
Ada	2.40448	3.2294e-07	4.1066e-06	Up
Hcst	2.40353	9.17669e-05	0.000637282	Up
Itgam	2.3969	3.02252e-07	3.87902e-06	Up
Myc	2.39506	5.54009e-08	8.57088e-07	Up
Rnf125	2.39482	7.32268e-08	1.09304e-06	Up
Slc7a6	2.39278	6.49591e-07	7.75703e-06	Up
Ifitm2	2.39099	5.26802e-08	8.19142e-07	Up
Litaf	2.38887	3.86896e-08	6.23808e-07	Up
Col1a2	2.3823	4.3071e-08	6.84346e-07	Up
Adamdec1	2.37818	2.28503e-06	2.40879e-05	Up
Arhgap19	2.37781	0.00064876	0.00341588	Up
Pdgfrb	2.3775	6.59011e-08	9.99304e-07	Up
Mxra8	2.37544	1.66161e-07	2.27172e-06	Up
Alox5ap	2.37387	8.46353e-07	9.80038e-06	Up
Schip1	2.37187	3.46639e-05	0.000271016	Up
Arl4d	2.37133	6.21877e-07	7.46692e-06	Up
Rab19	2.3708	0.00151665	0.00688913	Up
Myrip	2.3708	0.00151665	0.00688913	Up
Clic1	2.36398	6.92891e-08	1.04446e-06	Up
Ptpn7	2.36379	1.47819e-05	0.000127254	Up
Cdr2	2.36332	3.77184e-07	4.74116e-06	Up
Pygm	2.36239	0.000132743	0.000882163	Up
Gadd45g	2.35615	7.84748e-08	1.16568e-06	Up
Phlda1	2.35381	1.49437e-06	1.63973e-05	Up
Slc6a8	2.34897	1.53617e-07	2.11535e-06	Up
Mefv	2.34633	8.13336e-05	0.000572632	Up
C8h15orf39	2.34568	1.36378e-07	1.90368e-06	Up
Spsb1	2.34451	2.21279e-07	2.92329e-06	Up
Ltb	2.3363	2.16217e-06	2.28869e-05	Up
Tgm1	2.33137	1.9493e-06	2.08212e-05	Up
Mesp2	2.32955	1.09976e-05	9.86496e-05	Up
Tgfb1i1	2.32927	1.63072e-06	1.76402e-05	Up
Rps6ka2	2.32333	4.40796e-06	4.35243e-05	Up
Wsb1	2.32163	8.70843e-08	1.27743e-06	Up
Ccn1	2.32027	1.18597e-07	1.67074e-06	Up
Alas2	2.31878	1.63313e-07	2.23678e-06	Up
Dtx3	2.31555	5.06583e-07	6.19946e-06	Up
Cd33	2.31299	1.06741e-05	9.62562e-05	Up
Gldc	2.30934	9.03282e-08	1.31617e-06	Up
Lrrc8e	2.30741	0.000115634	0.000782413	Up
Prdm16	2.30474	0.00111107	0.00534718	Up
Azin2	2.30079	0.000513333	0.00278534	Up
Ezr	2.29835	3.05138e-07	3.9095e-06	Up
Ednrb	2.29807	7.57036e-07	8.89415e-06	Up
Lyl1	2.29698	9.57405e-06	8.71067e-05	Up
Pmepa1	2.29138	2.71056e-06	2.80318e-05	Up
Pla2g12a	2.29052	1.48322e-07	2.05168e-06	Up
Nrcam	2.28832	3.3471e-06	3.39373e-05	Up
Mdk	2.28801	2.66569e-05	0.000216154	Up
Kif15	2.28784	4.92717e-05	0.000368574	Up
Cemip	2.28755	0.000138064	0.000910402	Up
Lamc2	2.28328	5.82395e-07	7.03486e-06	Up
Atp8b2	2.28091	1.13773e-06	1.28721e-05	Up
Anxa7	2.27954	2.12055e-07	2.80629e-06	Up
Sema3f	2.2785	1.39837e-06	1.54437e-05	Up
Spc25	2.27642	0.000232646	0.00143445	Up
Galnt6	2.27642	0.000232646	0.00143445	Up
Kcna3	2.27642	0.000232646	0.00143445	Up
Spint1	2.27634	3.00309e-05	0.0002402	Up
Tead4	2.26835	0.0014361	0.00657409	Up
Hcn2	2.26835	0.0014361	0.00657409	Up
Ndn	2.26835	0.0014361	0.00657409	Up
Hivep2	2.26719	1.25051e-06	1.39519e-05	Up
Mfge8	2.26109	1.56815e-07	2.15744e-06	Up
Map1b	2.25888	6.17477e-07	7.41992e-06	Up
Appl1	2.255	1.14251e-06	1.29071e-05	Up
Fhl1	2.2527	1.22293e-06	1.36641e-05	Up
Efna1	2.24719	2.08917e-07	2.76716e-06	Up
Rab31	2.23983	5.62923e-07	6.81797e-06	Up
Rap1gap2	2.2368	5.23464e-06	5.10277e-05	Up
Srd5a3	2.2332	8.89827e-07	1.02417e-05	Up
Ehd2	2.23197	1.44719e-06	1.59139e-05	Up
Ogdhl	2.23143	0.00033982	0.00197872	Up
Alpl	2.22989	2.84433e-07	3.66573e-06	Up
Notch4	2.22973	1.26361e-06	1.40672e-05	Up
Adamts2	2.22573	1.27321e-06	1.41535e-05	Up
Adora2b	2.22489	1.8838e-05	0.000159082	Up
Timp2	2.22481	4.01965e-07	5.02374e-06	Up
Ppargc1a	2.22448	6.85447e-05	0.000494434	Up
Steap1	2.22301	0.00160897	0.00725676	Up
Rasa3	2.22108	8.23446e-07	9.57138e-06	Up
Acap1	2.21924	1.94073e-05	0.000163348	Up
Kif20b	2.2183	0.000176356	0.0011307	Up
Orai2	2.21701	6.54494e-06	6.22136e-05	Up
Aldoc	2.21442	4.00878e-05	0.000309622	Up
Fat1	2.21275	3.03708e-07	3.89444e-06	Up
Atp10a	2.21221	0.000619733	0.00328113	Up
B4galt6	2.20288	1.07607e-06	1.22379e-05	Up
Hbegf	2.20136	3.3446e-05	0.000262434	Up
Tp53inp1	2.20094	5.62657e-07	6.81797e-06	Up
Uck2	2.20041	0.000206725	0.00129819	Up
Kif11	2.19694	8.19661e-06	7.57926e-05	Up
Esam	2.19426	7.31495e-07	8.6339e-06	Up
Col5a2	2.18664	5.50916e-07	6.71511e-06	Up
Col8a2	2.18165	0.00017912	0.00114459	Up
Cftr	2.17943	7.00139e-05	0.00050408	Up
Cd37	2.17906	2.9019e-06	2.97888e-05	Up
Tyms	2.16464	8.66856e-07	9.99238e-06	Up
Prrg4	2.16347	6.95959e-07	8.27691e-06	Up
Cavin1	2.16319	0.000238999	0.00146769	Up
Hmgb2	2.16304	1.52122e-06	1.6668e-05	Up
Hip1r	2.16103	1.04604e-06	1.19319e-05	Up
Emilin2	2.15979	2.52516e-05	0.000205961	Up
Sox17	2.1581	9.05601e-06	8.3019e-05	Up
Aqp5	2.15396	8.28221e-06	7.64454e-05	Up
Asb2	2.14908	0.000156638	0.00101838	Up
Mgmt	2.14058	7.39485e-07	8.70962e-06	Up
Cd101	2.1403	0.000407477	0.00229741	Up
Eln	2.13459	1.02923e-06	1.17489e-05	Up
Card11	2.13414	2.64122e-05	0.000214397	Up
Cdca7	2.13272	6.64123e-05	0.000480413	Up
Jaml	2.13111	3.54645e-05	0.000276569	Up
Gpx7	2.12684	8.33662e-06	7.67724e-05	Up
Itga6	2.12662	1.15275e-06	1.29939e-05	Up
Trib3	2.1257	1.40967e-06	1.55461e-05	Up
Dpp7	2.12296	1.3798e-06	1.52717e-05	Up
Snx10	2.12233	1.46074e-05	0.000126215	Up
Mpzl2	2.1164	3.30322e-05	0.000259854	Up
Pik3c2b	2.11587	2.50341e-05	0.000204405	Up
Plk2	2.11539	8.14346e-07	9.47282e-06	Up
Gab2	2.11475	3.39412e-06	3.43343e-05	Up
Kcnj8	2.11326	3.15801e-06	3.21802e-05	Up
Pdgfa	2.1126	3.94005e-06	3.93361e-05	Up
Gmpr	2.11241	0.000733197	0.00379381	Up
Chac1	2.11198	2.40751e-05	0.000197631	Up
Adcy1	2.10929	9.27628e-06	8.47001e-05	Up
Rora	2.10921	4.90997e-06	4.80467e-05	Up
Pea15	2.10782	1.5464e-06	1.69197e-05	Up
Zfp521	2.10558	0.00114297	0.00548345	Up
Gsn	2.10335	1.87598e-06	2.0066e-05	Up
Soat1	2.10295	2.16021e-06	2.28821e-05	Up
Atg16l2	2.09963	5.29628e-06	5.14973e-05	Up
Slc20a1	2.09836	1.08935e-06	1.2343e-05	Up
Nos3	2.09792	2.48693e-06	2.60005e-05	Up
Cdkl2	2.09714	8.37326e-05	0.000587358	Up
Socs1	2.09532	0.000588514	0.00313382	Up
Myh10	2.09268	3.13899e-06	3.20077e-05	Up
Kntc1	2.08738	0.000890608	0.00442842	Up
Knl1	2.08579	5.26806e-05	0.000391075	Up
Col6a3	2.08421	1.7278e-06	1.85851e-05	Up
Dsg1	2.0829	5.78889e-05	0.000424584	Up
Mal	2.08285	0.000283294	0.00169677	Up
Arhgap22	2.08285	0.000283294	0.00169677	Up
Col15a1	2.08042	4.19932e-05	0.000322708	Up
Rab30	2.07855	2.0843e-06	2.2201e-05	Up
Dsn1	2.0785	9.61748e-05	0.000665776	Up
Cd247	2.07764	0.00140429	0.00651824	Up
Sytl1	2.07764	0.00140429	0.00651824	Up
Cenpq	2.07764	0.00140429	0.00651824	Up
Lsp1	2.07713	3.38731e-06	3.42881e-05	Up
Capn12	2.07351	2.06137e-05	0.000172081	Up
Fxyd2	2.06688	1.40469e-05	0.000122201	Up
Akap12	2.06559	8.33513e-06	7.67724e-05	Up
Itga3	2.06359	1.09919e-05	9.86496e-05	Up
Mical1	2.06208	2.38819e-05	0.000196256	Up
Ppp2r1b	2.06116	3.9179e-06	3.91406e-05	Up
Egfl7	2.06051	2.60697e-06	2.71256e-05	Up
Nexn	2.05483	0.000148861	0.000975705	Up
Srgn	2.05428	2.54243e-06	2.65263e-05	Up
Cystm1	2.05317	2.6773e-06	2.77065e-05	Up
Kcne4	2.05244	4.09662e-05	0.000315609	Up
Arhgef25	2.05188	3.43277e-05	0.0002688	Up
Endod1	2.04869	0.000640504	0.00337823	Up
Gpr4	2.04794	2.0732e-05	0.00017288	Up
Tax1bp3	2.04676	2.54947e-06	2.65816e-05	Up
Mfng	2.04346	6.11366e-05	0.000445411	Up
Tnfrsf10b	2.04053	5.68971e-06	5.47998e-05	Up
Pmm1	2.03894	2.63007e-06	2.73102e-05	Up
Hbb-b2	2.03309	1.83248e-06	1.96557e-05	Up
Itpr3	2.03036	0.000120788	0.000809404	Up
Pdlim7	2.02487	5.426e-06	5.26246e-05	Up
Sptbn5	2.02472	1.91472e-05	0.000161426	Up
Ctsk	2.02183	1.30968e-05	0.000115247	Up
Col6a2	2.02142	2.62852e-06	2.73102e-05	Up
Lamc1	2.02033	2.65815e-06	2.75456e-05	Up
Ninl	2.0183	0.000135438	0.000896956	Up
Ptpre	2.0167	3.96798e-05	0.000307092	Up
Adam12	2.01651	0.000114799	0.000778831	Up
Fzd3	2.01594	0.000684293	0.0035649	Up
Map3k9	2.01473	1.26455e-05	0.000112022	Up
Ebi3	2.01258	0.000105199	0.000721062	Up
Gna15	2.00893	9.67852e-05	0.000669092	Up
Krt8	2.00827	2.43273e-06	2.55037e-05	Up
Slc22a15	2.00812	2.61871e-05	0.000212683	Up
RGD1562402	2.00139	4.25246e-06	4.21523e-05	Up
Bcl2a1	2.00073	1.07899e-05	9.70714e-05	Up
Ndrg2	-2.00007	2.64766e-06	2.74556e-05	Down
Slc22a1	-2.00258	2.72099e-06	2.81206e-05	Down
Mug2	-2.00335	2.64652e-06	2.74556e-05	Down
Mllt3	-2.00504	1.04256e-05	9.41818e-05	Down
Kif26b	-2.00688	8.78993e-05	0.000612929	Down
Bmp10	-2.01212	0.000329003	0.00192427	Down
Hsph1	-2.01713	2.61101e-06	2.71492e-05	Down
Acox2	-2.01988	2.14911e-06	2.27803e-05	Down
Cacna2d2	-2.02139	0.00140429	0.00651824	Down
Cldn14	-2.02271	3.91615e-06	3.91406e-05	Down
Arhgef26	-2.03417	2.19106e-06	2.31447e-05	Down
Cd274	-2.03445	0.000283294	0.00169677	Down
Ackr4	-2.03543	2.95475e-05	0.000237202	Down
Abcc8	-2.04017	3.96201e-05	0.000306785	Down
Ppara	-2.04225	4.54426e-06	4.47545e-05	Down
Efna5	-2.04921	4.38167e-06	4.33207e-05	Down
Kcnj15	-2.05071	3.6494e-06	3.66498e-05	Down
Itih1	-2.05127	1.50874e-06	1.65431e-05	Down
Cyp2e1	-2.05303	1.46429e-06	1.60788e-05	Down
Gstm7	-2.057	1.69221e-06	1.82408e-05	Down
Stbd1	-2.06137	1.59107e-06	1.73711e-05	Down
Tsc22d3	-2.06251	1.66437e-06	1.79534e-05	Down
Lrat	-2.06353	8.61537e-06	7.91858e-05	Down
Acadsb	-2.06398	1.37471e-06	1.52264e-05	Down
Hs3st3b1	-2.0769	1.00525e-05	9.11261e-05	Down
Faah	-2.07714	1.20253e-06	1.34559e-05	Down
Slc30a10	-2.08238	2.72515e-06	2.81446e-05	Down
Fn3k	-2.08624	4.00942e-06	4.00026e-05	Down
Hsd11b2	-2.09046	2.52516e-05	0.000205961	Down
Trim2	-2.09528	2.13129e-06	2.26385e-05	Down
Mgam	-2.09892	1.44203e-06	1.58686e-05	Down
Vnn1	-2.10012	2.45793e-06	2.57149e-05	Down
Acat2	-2.10322	1.19277e-06	1.33564e-05	Down
Otub2	-2.10539	4.91981e-06	4.81122e-05	Down
Mkks	-2.11186	4.08113e-06	4.05856e-05	Down
Mmut	-2.1238	7.17943e-07	8.48705e-06	Down
Chdh	-2.12452	6.96376e-07	8.27691e-06	Down
Immp2l	-2.12548	6.69385e-06	6.34711e-05	Down
Sc5d	-2.13064	6.65736e-07	7.93123e-06	Down
Slco1a5	-2.13322	6.40949e-07	7.67181e-06	Down
Cd81	-2.13442	8.17159e-06	7.56528e-05	Down
Trim14	-2.13477	8.0733e-07	9.39835e-06	Down
Stag1	-2.13564	8.62806e-07	9.9532e-06	Down
Itga7	-2.13713	7.90277e-06	7.36099e-05	Down
Arhgef19	-2.13859	1.2785e-06	1.42019e-05	Down
Mad1l1	-2.14178	1.71676e-06	1.84793e-05	Down
Pxmp2	-2.14247	5.87277e-07	7.08487e-06	Down
Klf13	-2.14726	1.14978e-06	1.297e-05	Down
Gcat	-2.14767	7.69012e-07	9.00027e-06	Down
Znrf3	-2.14787	0.000169373	0.00108913	Down
Cyp39a1	-2.16406	4.61754e-07	5.72882e-06	Down
Pank1	-2.1653	4.59454e-07	5.70491e-06	Down
Gzma	-2.1667	0.000192772	0.00122415	Down
Entpd7	-2.16991	2.05767e-05	0.000171866	Down
Prex2	-2.17419	2.90783e-06	2.98195e-05	Down
Rab40b	-2.17533	2.76995e-06	2.85109e-05	Down
Slc27a5	-2.1772	3.81081e-07	4.78229e-06	Down
Hsd17b14	-2.17962	1.10208e-05	9.87991e-05	Down
Rtn4rl2	-2.18689	9.46429e-07	1.08605e-05	Down
Gphn	-2.19121	6.45511e-07	7.71434e-06	Down
Amy1	-2.19214	3.16581e-07	4.04255e-06	Down
Ephb6	-2.19469	8.94292e-07	1.02854e-05	Down
Cyp4f1	-2.20031	2.86905e-07	3.69447e-06	Down
Shpk	-2.2024	3.92471e-07	4.91714e-06	Down
Dao	-2.20379	3.06734e-07	3.92666e-06	Down
Lhx2	-2.20445	3.42077e-05	0.000267999	Down
Aadac	-2.20508	3.32891e-07	4.21211e-06	Down
Acsm1	-2.20613	2.74215e-07	3.549e-06	Down
Fmo4	-2.21007	6.14861e-07	7.40595e-06	Down
Epm2a	-2.22091	2.65418e-05	0.000215335	Down
Nrg4	-2.22123	8.72439e-07	1.00492e-05	Down
Adam23	-2.22174	0.000101663	0.000700912	Down
LOC100909998	-2.22252	0.000339042	0.0019757	Down
Chn2	-2.2248	3.30925e-07	4.19418e-06	Down
Egf	-2.2257	5.02616e-07	6.17563e-06	Down
Sdc2	-2.2304	2.02274e-07	2.68149e-06	Down
Stxbp4	-2.23587	2.10309e-05	0.000174895	Down
Serpina6	-2.23774	1.87913e-07	2.5107e-06	Down
Car1	-2.24043	3.86174e-06	3.86806e-05	Down
Klkb1	-2.2418	1.8462e-07	2.4732e-06	Down
Wwox	-2.24364	0.000521035	0.00280819	Down
Tsku	-2.24389	1.75246e-07	2.36003e-06	Down
Dhtkd1	-2.2455	1.77461e-07	2.38356e-06	Down
Ppfia2	-2.24691	0.000415	0.00233037	Down
Cdo1	-2.24701	1.66162e-07	2.27172e-06	Down
Hadh	-2.25444	1.57317e-07	2.1624e-06	Down
Inhba	-2.25956	0.000415	0.00233037	Down
Large1	-2.26393	7.09367e-07	8.39866e-06	Down
Dio1	-2.26796	1.41278e-07	1.9649e-06	Down
Gk	-2.28077	1.38036e-07	1.92508e-06	Down
Pou3f1	-2.28305	0.000411667	0.00231762	Down
Klhl42	-2.28522	7.77305e-06	7.25785e-05	Down
Crym	-2.28912	1.44403e-07	2.00291e-06	Down
Aox1	-2.29707	9.50813e-08	1.37755e-06	Down
Pon1	-2.29772	9.19498e-08	1.33853e-06	Down
Slco2b1	-2.29795	1.00673e-07	1.44623e-06	Down
Pde6c	-2.30845	5.74146e-05	0.000422068	Down
Fabp7	-2.30947	1.52855e-07	2.10675e-06	Down
Rhobtb1	-2.31217	1.01714e-07	1.45981e-06	Down
Colec10	-2.31331	1.77007e-07	2.37956e-06	Down
Zfp189	-2.31491	1.02528e-07	1.46885e-06	Down
Xpnpep2	-2.31888	9.68094e-08	1.39861e-06	Down
Pcsk9	-2.3198	8.82228e-08	1.29042e-06	Down
Pld6	-2.32021	3.46328e-05	0.000270912	Down
Sts	-2.32071	9.69584e-08	1.39944e-06	Down
Mpv17l	-2.33338	9.0182e-08	1.3153e-06	Down
Stx1b	-2.33593	0.00151665	0.00688913	Down
Abat	-2.33656	7.03018e-08	1.05764e-06	Down
Apoc1	-2.33661	5.79793e-08	8.86214e-07	Down
Fzd8	-2.34281	6.86025e-08	1.03513e-06	Down
Acss3	-2.34314	7.12452e-08	1.06868e-06	Down
Cabp2	-2.34595	7.24318e-08	1.08329e-06	Down
Bhlha15	-2.34765	2.58178e-07	3.35852e-06	Down
Psd3	-2.34824	9.86734e-08	1.42151e-06	Down
Ces2h	-2.35139	6.688e-08	1.01114e-06	Down
Mapt	-2.37112	1.6052e-06	1.74614e-05	Down
Acly	-2.37249	4.06878e-08	6.53271e-07	Down
Slc6a13	-2.38258	4.75136e-08	7.47165e-07	Down
Adamts13	-2.38296	9.57976e-08	1.3853e-06	Down
Gpt2	-2.3894	3.1914e-08	5.22275e-07	Down
Kmo	-2.39126	3.28637e-08	5.35524e-07	Down
Clmn	-2.39332	5.56329e-08	8.58072e-07	Down
Cpt1a	-2.39467	3.02567e-08	4.96749e-07	Down
Pign	-2.39927	1.60851e-07	2.20504e-06	Down
Adamts7	-2.40832	8.24724e-08	1.21444e-06	Down
Enpep	-2.40851	3.65279e-08	5.89576e-07	Down
Hmgcs2	-2.41723	2.20548e-08	3.72083e-07	Down
Ntng1	-2.42451	2.6009e-05	0.000211461	Down
Hao1	-2.42841	1.99985e-08	3.41091e-07	Down
Idi1	-2.42975	2.32527e-08	3.9186e-07	Down
Elovl5	-2.42991	1.97991e-08	3.40033e-07	Down
Rxra	-2.43196	2.45067e-08	4.1073e-07	Down
Fasn	-2.43949	1.85498e-08	3.19294e-07	Down
Sord	-2.44121	1.66808e-08	2.91096e-07	Down
Nadk2	-2.44163	1.75608e-08	3.04328e-07	Down
Lpar2	-2.44295	0.00159155	0.00719515	Down
Diaph2	-2.45094	1.40291e-06	1.54827e-05	Down
Egfr	-2.45711	1.78963e-08	3.0944e-07	Down
Mcm10	-2.45868	5.39752e-08	8.38425e-07	Down
Pxmp4	-2.46321	1.7934e-08	3.09742e-07	Down
Aldh8a1	-2.46332	1.31779e-08	2.3367e-07	Down
Erc1	-2.46399	2.76032e-07	3.56208e-06	Down
Kcna2	-2.46687	1.43737e-06	1.58287e-05	Down
Abca6	-2.46828	1.44969e-08	2.55872e-07	Down
Hnf4g	-2.47829	0.000178139	0.00113927	Down
Prdm9	-2.48106	1.97315e-06	2.10612e-05	Down
Akr1c2	-2.48436	1.00044e-07	1.43854e-06	Down
Col24a1	-2.48736	0.0006696	0.00350029	Down
Zfp764	-2.4905	1.05065e-06	1.19755e-05	Down
Adora3	-2.49366	1.29326e-05	0.000113999	Down
Plcb1	-2.49768	2.75935e-08	4.57448e-07	Down
Lin7a	-2.51725	1.43737e-06	1.58287e-05	Down
AKR1C3l1	-2.52688	2.04057e-08	3.45788e-07	Down
Cyp7a1	-2.52781	6.05231e-09	1.13509e-07	Down
Ntn1	-2.53027	1.25355e-07	1.75946e-06	Down
Il1rap	-2.53273	1.1337e-08	2.02673e-07	Down
Tm7sf2	-2.53291	6.84012e-09	1.26729e-07	Down
Prkn	-2.53798	9.17307e-06	8.38579e-05	Down
Thumpd1	-2.54545	6.51304e-09	1.21553e-07	Down
Nsdhl	-2.54776	4.65038e-09	8.85194e-08	Down
Baat	-2.55029	4.34427e-09	8.33152e-08	Down
Pc	-2.55139	4.38733e-09	8.39304e-08	Down
Cxcl12	-2.56452	3.8808e-09	7.48964e-08	Down
Slc3a1	-2.58106	4.08819e-06	4.06294e-05	Down
Oit3	-2.58157	3.16277e-08	5.18145e-07	Down
Hrg	-2.58735	2.68932e-09	5.33848e-08	Down
Slc10a1	-2.59162	2.6104e-09	5.19532e-08	Down
Retsat	-2.59686	2.47205e-09	4.93925e-08	Down
Acss2	-2.59773	3.47825e-09	6.75168e-08	Down
Acadm	-2.60221	2.28624e-09	4.61019e-08	Down
Amacr	-2.60954	2.1326e-09	4.34045e-08	Down
Cyp3a18	-2.61117	2.04849e-09	4.19159e-08	Down
Kbtbd8	-2.6192	7.26356e-08	1.08527e-06	Down
Usp2	-2.61941	3.4592e-09	6.73552e-08	Down
Ppp1r3b	-2.6268	1.75975e-09	3.64469e-08	Down
Serpina4	-2.65284	1.18436e-09	2.51081e-08	Down
Thrb	-2.656	2.24639e-09	4.55385e-08	Down
Maob	-2.67835	9.42622e-10	2.03502e-08	Down
Napepld	-2.68622	2.16882e-08	3.66708e-07	Down
St8sia3	-2.70338	3.16262e-09	6.20547e-08	Down
Ghr	-2.70761	6.0933e-10	1.37167e-08	Down
Akap5	-2.70882	4.11152e-08	6.56098e-07	Down
Igf2bp3	-2.71009	1.74507e-09	3.61918e-08	Down
Cyp3a9	-2.72001	7.45301e-10	1.64623e-08	Down
Gsta2	-2.72663	4.63079e-10	1.05961e-08	Down
Ltc4s	-2.72827	7.42682e-08	1.10673e-06	Down
Trpm6	-2.73001	1.9148e-08	3.29221e-07	Down
Sdc3	-2.73086	9.16454e-09	1.65775e-07	Down
Mug1	-2.73262	4.18186e-10	9.71425e-09	Down
Slco2a1	-2.743	3.91188e-10	9.18083e-09	Down
Lipc	-2.74402	3.83691e-10	9.03654e-09	Down
Acsl1	-2.75853	3.00641e-10	7.2112e-09	Down
Cgnl1	-2.76226	8.25551e-10	1.80523e-08	Down
Slc17a2	-2.77669	3.73294e-10	8.81886e-09	Down
Slc17a8	-2.78228	1.86467e-05	0.000157903	Down
Derl3	-2.78348	1.69694e-08	2.94747e-07	Down
Xk	-2.79214	5.91587e-09	1.11223e-07	Down
Inhbc	-2.79221	3.01469e-10	7.2112e-09	Down
Xpnpep3	-2.80196	4.32751e-07	5.38649e-06	Down
Ttpa	-2.80641	1.64592e-10	4.17906e-09	Down
Slc22a3	-2.80735	1.16813e-05	0.000104232	Down
Ehd3	-2.80747	2.3066e-10	5.64102e-09	Down
Nr0b2	-2.81338	2.50366e-10	6.07435e-09	Down
Apoa2	-2.81379	1.45836e-10	3.7527e-09	Down
Acsbg1	-2.81614	1.46563e-05	0.000126423	Down
Lrrc4c	-2.81614	1.46563e-05	0.000126423	Down
Dbp	-2.81637	1.5588e-10	3.991e-09	Down
Igfals	-2.82055	1.41909e-10	3.65782e-09	Down
Pik3c2g	-2.83709	6.5798e-10	1.47467e-08	Down
Cdon	-2.83869	1.02205e-08	1.84223e-07	Down
AABR07006691.1	-2.84274	1.98913e-10	4.91972e-09	Down
Avpr1a	-2.84641	2.24634e-10	5.50246e-09	Down
Clcn5	-2.85632	0.00159793	0.00721761	Down
Ttll10	-2.85632	0.00159793	0.00721761	Down
Olr59	-2.86088	2.96883e-10	7.13499e-09	Down
Sall4	-2.86213	0.000186219	0.00118499	Down
Slc46a1	-2.89046	7.69861e-11	2.09383e-09	Down
Pianp	-2.90715	9.92269e-07	1.13524e-05	Down
Reg4	-2.91744	2.6794e-08	4.45643e-07	Down
Glyat	-2.92253	3.66516e-11	1.05902e-09	Down
Sult1c3	-2.92932	3.27961e-11	9.5302e-10	Down
Arhgef37	-2.93828	0.00108459	0.00523955	Down
Camk1d	-2.94153	9.94543e-10	2.14107e-08	Down
Msmo1	-2.94895	2.70019e-11	8.02964e-10	Down
Slc2a5	-2.95204	1.12365e-10	2.95103e-09	Down
Fhit	-2.9617	7.57844e-07	8.89681e-06	Down
Cat	-2.96429	1.92973e-11	5.97083e-10	Down
Ntf3	-2.96654	5.28853e-09	1.00044e-07	Down
Cyp51	-3.00715	1.16224e-11	3.79592e-10	Down
Hmgcs1	-3.01402	1.02603e-11	3.37994e-10	Down
Tmem132e	-3.01946	3.18491e-07	4.05678e-06	Down
Cacna2d4	-3.01947	2.12067e-09	4.32192e-08	Down
Ptprd	-3.01998	1.92497e-11	5.96818e-10	Down
Nr1i3	-3.02933	1.19142e-11	3.88291e-10	Down
Exph5	-3.05031	6.66191e-09	1.23992e-07	Down
Kctd7	-3.05477	1.10507e-06	1.25118e-05	Down
LOC102555453	-3.0593	7.51867e-11	2.04854e-09	Down
Lox	-3.06012	2.90815e-11	8.5483e-10	Down
Reps2	-3.07184	5.82005e-07	7.03486e-06	Down
Akr1c3	-3.12624	1.00173e-10	2.64903e-09	Down
Col13a1	-3.13213	2.30473e-09	4.64135e-08	Down
Slc16a2	-3.14099	2.36759e-12	8.53505e-11	Down
Icam5	-3.14403	9.43636e-07	1.08366e-05	Down
Tex56p	-3.15945	0.000240916	0.0014771	Down
Aldh1l2	-3.16911	1.61361e-12	6.07487e-11	Down
Ddc	-3.18413	2.08712e-12	7.59564e-11	Down
P2rx7	-3.18566	1.97217e-12	7.21162e-11	Down
Pklr	-3.20156	8.21974e-13	3.24648e-11	Down
Akap6	-3.22348	1.38101e-05	0.00012028	Down
Slc12a3	-3.22348	1.38101e-05	0.00012028	Down
Adamtsl3	-3.22452	4.29727e-05	0.000329077	Down
Oas3	-3.22452	4.29727e-05	0.000329077	Down
Hormad2	-3.22952	0.000884859	0.00440413	Down
Dpys	-3.2509	3.88231e-13	1.60381e-11	Down
Edar	-3.25712	1.71046e-11	5.35745e-10	Down
Nlrp12	-3.28068	4.65837e-13	1.89101e-11	Down
Smad9	-3.29006	0.000116677	0.000787378	Down
Slc13a2	-3.29965	8.87585e-11	2.38431e-09	Down
Gfra1	-3.32585	2.07911e-11	6.2929e-10	Down
Ppp1r3c	-3.34386	1.04938e-13	4.7315e-12	Down
Upp2	-3.34389	1.62103e-13	7.11994e-12	Down
Ehhadh	-3.34566	1.0573e-13	4.75321e-12	Down
Thrsp	-3.38518	5.4311e-14	2.55429e-12	Down
Angptl6	-3.40023	5.00146e-12	1.71406e-10	Down
Omd	-3.43986	4.98743e-13	2.01674e-11	Down
Cxcl13	-3.48114	4.36261e-10	1.00881e-08	Down
Mmp16	-3.49633	4.88882e-07	6.036e-06	Down
Atp11c	-3.49867	1.73577e-14	8.75617e-13	Down
Bdh1	-3.50385	1.26471e-14	6.46527e-13	Down
Nrep	-3.50921	1.50436e-14	7.63923e-13	Down
Clca2	-3.51778	2.00556e-08	3.41091e-07	Down
Extl1	-3.53204	3.04052e-14	1.48956e-12	Down
Acot12	-3.54579	1.05064e-14	5.44372e-13	Down
LOC297568	-3.54824	4.89861e-15	2.6646e-13	Down
Il1a	-3.55773	3.69522e-12	1.29842e-10	Down
Kcnh1	-3.57709	2.49091e-07	3.25693e-06	Down
Ces1e	-3.61904	1.75851e-15	1.01814e-13	Down
Hykk	-3.63447	6.41962e-14	2.96447e-12	Down
Nat8	-3.66355	3.19344e-15	1.76215e-13	Down
Slc30a2	-3.66909	3.76375e-10	8.87792e-09	Down
Csad	-3.68395	7.22799e-16	4.43694e-14	Down
Blk	-3.68701	1.25988e-06	1.40359e-05	Down
Zfp354a	-3.69607	7.70181e-16	4.70889e-14	Down
Enpp2	-3.71091	6.13616e-16	3.90797e-14	Down
Kcnk3	-3.71202	4.95961e-05	0.000370697	Down
Hao2	-3.71263	4.62327e-16	3.0071e-14	Down
Agmo	-3.71672	4.48248e-16	2.94055e-14	Down
Pfkfb1	-3.72187	6.58321e-16	4.14092e-14	Down
Fabp1	-3.74075	2.85356e-16	1.92994e-14	Down
C1qtnf3	-3.76461	4.01499e-06	4.0006e-05	Down
A1cf	-3.7939	4.54459e-16	2.96855e-14	Down
Dab1	-3.82528	1.94117e-09	3.97732e-08	Down
Slc22a8	-3.82834	1.0239e-16	7.52422e-15	Down
Cd300lg	-3.85938	5.64103e-08	8.67435e-07	Down
Krt79	-3.8656	3.15148e-14	1.52922e-12	Down
Gck	-3.87402	1.8652e-16	1.30778e-14	Down
Gria2	-3.93162	0.00213372	0.00924953	Down
Slco1b2	-3.93388	1.58439e-17	1.30904e-15	Down
Unc5d	-4.03769	0.00136958	0.00638425	Down
Gdf10	-4.03769	0.00136958	0.00638425	Down
St8sia6	-4.07296	5.24925e-06	5.1105e-05	Down
Adgrv1	-4.13544	2.72648e-16	1.85219e-14	Down
Gfap	-4.15578	1.51753e-07	2.09346e-06	Down
Hacl1	-4.16821	5.28636e-19	5.42296e-17	Down
Sp5	-4.22439	1.29886e-06	1.44072e-05	Down
Col22a1	-4.22896	0.000575412	0.00306987	Down
Timd4	-4.31586	0.000376589	0.00214382	Down
Ttn	-4.31586	0.000376589	0.00214382	Down
Cbln3	-4.3513	1.29001e-16	9.30085e-15	Down
Inhbe	-4.39298	3.21055e-20	3.92586e-18	Down
Cyp3a2	-4.43838	5.80095e-21	8.04828e-19	Down
Abcg5	-4.4735	6.7585e-20	7.77781e-18	Down
Fads2	-4.47961	5.29196e-21	7.42089e-19	Down
Notum	-4.71864	1.39838e-21	2.09552e-19	Down
Abcg8	-4.74082	1.3868e-20	1.82735e-18	Down
Esr1	-4.74836	7.2377e-14	3.31222e-12	Down
Ces1c	-4.80313	1.70153e-23	3.21084e-21	Down
Rgn	-4.83017	1.13034e-23	2.18698e-21	Down
Fads1	-4.93146	3.40972e-24	7.1394e-22	Down
Esrrg	-4.94934	3.73205e-16	2.46946e-14	Down
Clec4g	-4.96712	3.27174e-20	3.96893e-18	Down
Hsd17b2	-4.98418	9.37634e-25	2.20488e-22	Down
Epha3	-5.00974	1.7052e-11	5.35194e-10	Down
Adam11	-5.01307	2.06617e-21	3.03667e-19	Down
Slc13a3	-5.06366	3.63205e-23	6.60903e-21	Down
Rspo3	-5.1785	8.20482e-08	1.20936e-06	Down
Tymp	-5.24388	6.37434e-26	1.70933e-23	Down
Dars2	-5.2781	5.39986e-20	6.34899e-18	Down
Gdf2	-5.35551	9.03795e-24	1.77109e-21	Down
Akr1c1	-5.43126	9.56622e-26	2.4783e-23	Down
Slc13a4	-5.75261	9.03344e-29	3.28753e-26	Down
Vsig4	-5.92275	7.92987e-27	2.47363e-24	Down
Tppp	-6.00349	2.69457e-11	8.02857e-10	Down
Stab2	-6.01099	1.32112e-25	3.25698e-23	Down
Marco	-6.01724	6.5953e-28	2.2402e-25	Down
Vipr1	-6.39673	4.36608e-24	8.89808e-22	Down
Fmo1	-6.61278	3.76318e-35	2.30081e-32	Down
Cyp1a2	-6.67447	8.56086e-37	5.94785e-34	Down
Sult1e1	-6.98338	1.32908e-38	1.12861e-35	Down
Wnt2	-7.03891	0.000193974	0.00122466	Down
Pclo	-7.23018	7.55368e-05	0.000537014	Down
Cpb1	-7.31708	4.77659e-05	0.000358772	Down
Nox4	-7.37478	4.83189e-32	2.17222e-29	Down
Car3	-7.39873	2.01354e-42	2.19835e-39	Down
Inmt	-7.45636	6.30463e-37	4.58887e-34	Down
Plin1	-7.55019	1.26863e-05	0.000112022	Down
Plppr1	-7.81194	1.61305e-06	1.74614e-05	Down
Fras1	-8.17995	3.96969e-24	8.19955e-22	Down
Hhip	-8.31255	2.92755e-08	4.81676e-07	Down
Ucp1	-8.50991	4.20377e-09	8.07219e-08	Down
Clec4f	-8.56094	2.64737e-43	3.1127e-40	Down
Zfp37-ps1	-8.66869	9.29778e-10	2.01014e-08	Down
Clec4m	-8.68348	6.94986e-10	1.55078e-08	Down
Ush2a	-8.86749	1.29769e-10	3.36761e-09	Down
Cyp2c11	-8.91572	2.60061e-53	7.95007e-50	Down
Ntsr1	-8.95138	4.50078e-11	1.27397e-09	Down
Oca2	-9.17723	3.82466e-12	1.34082e-10	Down
Slc1a2	-13.0957	1.23403e-37	9.92746e-35	Down
