# Supplementary material for: Integrative Transcriptomic Analysis Reveals Upregulated Apoptotic Signaling in Wound-Healing Pathway in Rat Liver Fibrosis Models
Source: Antioxidants (Basel). 2023 Aug 9;12(8):1588. doi: 10.3390/antiox12081588 (PMC10451232; doi:10.3390/antiox12081588)
Supplement: Supplementary file 1 [file antioxidants-12-01588-s001.zip › Supplementary table S2.xlsx]

## Sheet: Sheet1
Gene symbol	LogFC	P-value	Adjusted p-value	Expression
Krt17	10.414	4.0271e-19	2.34268e-18	Up
Gucy2c	9.70815	3.4087e-100	4.71976e-98	Up
Cxcl6	9.68534	4.09969e-150	1.94101e-147	Up
Uchl1	9.65733	9.38591e-27	8.01379e-26	Up
Cldn6	9.03879	2.94855e-170	1.96709e-167	Up
Calcb	8.58802	7.58467e-14	3.20438e-13	Up
Prnd	8.57157	1.27149e-52	3.35641e-51	Up
Fcamr	8.46183	2.57881e-112	4.91547e-110	Up
Kcna6	8.45778	1.30344e-35	1.72193e-34	Up
Kif1a	8.34051	1.43435e-115	2.96507e-113	Up
Esrp1	8.33506	2.31999e-96	2.81409e-94	Up
Hs3st2	8.30248	2.69306e-31	2.8477e-30	Up
Cthrc1	8.25128	1.00102e-53	2.81997e-52	Up
Dynlrb2	8.24515	1.01036e-22	7.08847e-22	Up
Itgb6	8.18934	4.66179e-219	8.55264e-216	Up
Cldn7	8.13688	9.27878e-64	3.80404e-62	Up
Cxcl3	8.13658	9.57323e-33	1.08248e-31	Up
F2rl1	8.12266	4.09067e-44	7.68743e-43	Up
Mmp20	8.11162	8.7388e-28	7.83982e-27	Up
Epn3	8.05354	2.52963e-49	5.8653e-48	Up
Wnt11	7.99497	9.55348e-21	6.06735e-20	Up
Spdef	7.8236	3.3374e-23	2.39878e-22	Up
Syt1	7.73544	1.03151e-20	6.54539e-20	Up
Sgcg	7.71333	5.36167e-26	4.41105e-25	Up
Olr1	7.65254	3.45107e-85	2.92783e-83	Up
Rab15	7.64593	7.47303e-23	5.28077e-22	Up
Slc22a2	7.5908	3.34535e-20	2.06648e-19	Up
Tnnt2	7.45133	1.53675e-71	7.99819e-70	Up
Trem2	7.43544	3.02798e-32	3.34651e-31	Up
Pak6	7.41407	2.5627e-21	1.67391e-20	Up
Gabrp	7.35468	2.40197e-150	1.17512e-147	Up
Kcng3	7.31024	2.69505e-39	4.19907e-38	Up
Lcn2	7.28712	1.1895e-98	1.55877e-96	Up
Vangl2	7.27316	4.50466e-20	2.76863e-19	Up
Zfp286a	7.19858	1.76529e-16	8.79171e-16	Up
Tnfsf18	7.16688	1.33298e-29	1.3061e-28	Up
Slc6a17	7.12889	1.20089e-14	5.3185e-14	Up
Vil1	7.09798	2.01745e-81	1.49546e-79	Up
Bdkrb2	7.06578	6.37069e-21	4.07064e-20	Up
Krt7	7.01092	2.64037e-37	3.78815e-36	Up
Cldn4	6.99779	4.75416e-56	1.45977e-54	Up
Fst	6.98366	1.02811e-35	1.36681e-34	Up
Krt80	6.98004	3.29498e-18	1.82561e-17	Up
Htr1b	6.97175	2.6114e-16	1.28875e-15	Up
Dnaaf3	6.9673	1.01387e-15	4.80639e-15	Up
Ccl20	6.96369	5.54728e-49	1.25644e-47	Up
Sphk1	6.94622	1.62223e-49	3.7733e-48	Up
Tchhl1	6.9453	2.26397e-15	1.0532e-14	Up
Gpx2	6.89035	4.54631e-75	2.64786e-73	Up
Susd4	6.89021	6.28361e-17	3.20558e-16	Up
Serpine1	6.88379	1.18191e-36	1.6427e-35	Up
Cftr	6.85702	4.49388e-116	9.69951e-114	Up
Pde1c	6.81778	2.96486e-31	3.13285e-30	Up
Fndc1	6.8047	2.50123e-180	1.93214e-177	Up
Ap1m2	6.80442	1.14721e-112	2.21547e-110	Up
Elovl7	6.77461	3.84199e-101	5.42201e-99	Up
Brinp2	6.75825	1.3876e-15	6.53376e-15	Up
Igsf9b	6.75683	3.11694e-27	2.7182e-26	Up
Ank2	6.72227	2.66914e-295	3.91749e-291	Up
Cd44	6.69751	9.78238e-134	3.33898e-131	Up
Msln	6.66057	5.70372e-43	1.0259e-41	Up
Lama1	6.64277	3.50414e-23	2.51616e-22	Up
Inhbb	6.63667	6.63156e-51	1.64411e-49	Up
Sctr	6.60899	5.42003e-187	4.6794e-184	Up
Sema7a	6.59343	3.54555e-58	1.18e-56	Up
Bik	6.58964	4.48933e-39	6.93578e-38	Up
Gng13	6.58398	2.97724e-26	2.47575e-25	Up
Mmp12	6.55987	4.43775e-121	1.12298e-118	Up
Itga2	6.55832	2.20994e-84	1.80196e-82	Up
Crlf1	6.55621	5.56832e-26	4.57594e-25	Up
Ltbp2	6.50325	8.89851e-203	1.30603e-199	Up
Dclk1	6.4862	3.15561e-200	4.21045e-197	Up
Cdh4	6.48554	8.52869e-23	6.00362e-22	Up
Sdr16c5	6.48087	2.29885e-27	2.01434e-26	Up
Ankrd1	6.42727	7.94911e-131	2.65157e-128	Up
Fam169a	6.4236	1.85031e-56	5.76583e-55	Up
Sfn	6.38852	7.6383e-43	1.37051e-41	Up
Dcdc2	6.37902	3.34667e-119	8.0523e-117	Up
Spint1	6.35405	9.17115e-198	1.03542e-194	Up
Fut2	6.33299	6.36073e-21	4.06605e-20	Up
Sox9	6.31495	1.25879e-76	7.73021e-75	Up
Cdh6	6.31071	2.06809e-67	9.48541e-66	Up
Sema3b	6.28493	1.40083e-63	5.71111e-62	Up
Rptn	6.26096	2.44104e-12	9.42818e-12	Up
Vcan	6.25484	2.59985e-52	6.78968e-51	Up
Col9a2	6.25398	1.15799e-28	1.08669e-27	Up
Pdpn	6.24653	3.48456e-81	2.53183e-79	Up
Qpct	6.23938	2.9331e-75	1.72888e-73	Up
Atp10b	6.22142	1.01592e-27	9.08075e-27	Up
Gprc5b	6.18094	3.69768e-72	1.93135e-70	Up
Gdf6	6.17916	1.58326e-17	8.41328e-17	Up
Cfap52	6.15718	4.63102e-21	2.9772e-20	Up
Mlph	6.14245	9.66414e-88	8.86503e-86	Up
Tspan8	6.14046	4.55419e-267	2.22806e-263	Up
Etv4	6.12871	1.32072e-20	8.33729e-20	Up
Map2	6.0589	3.40549e-116	7.46005e-114	Up
Aplnr	6.04928	2.9767e-76	1.79054e-74	Up
Foxq1	6.04337	7.87217e-25	6.11969e-24	Up
Col9a3	6.03894	1.72984e-44	3.31448e-43	Up
Matn4	6.02454	1.16709e-45	2.36594e-44	Up
Kcnk10	5.97539	6.49022e-15	2.92469e-14	Up
Nt5c1a	5.97237	4.47433e-33	5.15056e-32	Up
Zscan10	5.94832	2.57438e-46	5.29191e-45	Up
Aldh1a2	5.9445	7.55518e-121	1.87945e-118	Up
Ctnna2	5.93931	1.23918e-40	2.03667e-39	Up
Penk	5.93522	2.09288e-25	1.6685e-24	Up
Fblim1	5.93008	5.58177e-112	1.0503e-109	Up
Gjb3	5.90169	1.5752e-17	8.37351e-17	Up
Egr2	5.90028	3.25913e-22	2.23734e-21	Up
Mboat2	5.89541	5.37826e-18	2.93882e-17	Up
Pitpnm3	5.89225	8.17916e-139	3.24447e-136	Up
Lif	5.88922	6.24772e-23	4.43198e-22	Up
Ace	5.87982	8.93819e-35	1.11933e-33	Up
Bok	5.85313	9.57737e-239	2.81134e-235	Up
Rhov	5.83978	9.86361e-28	8.82195e-27	Up
Postn	5.80537	2.49416e-32	2.7859e-31	Up
Fbln7	5.803	5.36789e-33	6.15024e-32	Up
Ptprt	5.78946	6.41434e-17	3.27114e-16	Up
Ttll6	5.78731	4.02608e-16	1.95341e-15	Up
Chrm3	5.77882	2.96627e-35	3.82229e-34	Up
Col11a1	5.76501	1.22261e-61	4.70978e-60	Up
Slc15a2	5.74661	2.32183e-35	3.00772e-34	Up
Slc5a9	5.74406	2.36212e-16	1.16927e-15	Up
Pak3	5.73512	9.23167e-16	4.38993e-15	Up
Sulf1	5.72506	2.05959e-60	7.48232e-59	Up
Mgp	5.70842	5.32581e-74	2.98825e-72	Up
Celsr1	5.70653	1.33333e-223	2.79562e-220	Up
Trpc6	5.70336	4.85674e-38	7.20752e-37	Up
Kif5c	5.69789	4.93299e-57	1.57053e-55	Up
Sdk1	5.69693	9.81049e-31	1.00974e-29	Up
Plet1	5.67527	5.69061e-24	4.27e-23	Up
Ros1	5.6724	1.56677e-29	1.52591e-28	Up
Gxylt2	5.66815	1.32939e-47	2.84423e-46	Up
Trim46	5.65602	1.52924e-21	1.0092e-20	Up
St6galnac2	5.6537	2.32589e-118	5.50598e-116	Up
Rasal1	5.63386	2.70721e-46	5.55715e-45	Up
Padi2	5.61909	6.1659e-137	2.20724e-134	Up
Ccn4	5.61233	8.57525e-24	6.36294e-23	Up
Kcnq4	5.60732	2.26636e-23	1.64507e-22	Up
Spp1	5.60027	1.98051e-40	3.24057e-39	Up
Cntn1	5.59989	2.82621e-43	5.12102e-42	Up
Map1b	5.58485	1.95565e-109	3.41703e-107	Up
Srpx2	5.57775	9.08821e-126	2.61544e-123	Up
Greb1	5.57733	1.23648e-44	2.39733e-43	Up
Adamts8	5.56032	3.14696e-45	6.29262e-44	Up
Slc4a3	5.53775	3.44496e-38	5.14885e-37	Up
Ptprz1	5.5367	1.49818e-64	6.26462e-63	Up
Tnfaip6	5.52855	1.51799e-14	6.6825e-14	Up
Wnk2	5.51764	1.3796e-35	1.81327e-34	Up
Igfbp2	5.51464	2.87046e-32	3.1796e-31	Up
Fbxw10	5.49792	3.80887e-41	6.36705e-40	Up
Kcnip4	5.49092	3.44175e-27	2.98903e-26	Up
Adgrg1	5.47362	2.55934e-182	2.08686e-179	Up
P4htm	5.45791	9.47772e-20	5.69168e-19	Up
Igfbp5	5.44194	3.62214e-127	1.08494e-124	Up
Il1rapl1	5.43112	4.98091e-16	2.40318e-15	Up
Tgfb2	5.41558	4.12652e-193	4.32607e-190	Up
Lama5	5.38725	1.08775e-170	7.60237e-168	Up
Serinc2	5.3858	3.77927e-62	1.47916e-60	Up
S100b	5.36429	1.72407e-30	1.75602e-29	Up
Cubn	5.36017	1.5418e-41	2.62518e-40	Up
S100a6	5.35771	1.22955e-36	1.70729e-35	Up
Fjx1	5.35692	7.79255e-19	4.46221e-18	Up
Scube3	5.35617	1.82753e-84	1.50689e-82	Up
Bdnf	5.35481	1.29161e-17	6.90601e-17	Up
Cd24	5.32801	4.24183e-105	6.69433e-103	Up
Lin28a	5.32776	9.28958e-30	9.19374e-29	Up
Loxl1	5.32398	7.7741e-158	4.56402e-155	Up
Gpc1	5.28918	3.16191e-26	2.62337e-25	Up
B3galt5	5.263	2.06621e-24	1.57864e-23	Up
Creb5	5.24648	6.8532e-31	7.14378e-30	Up
Grik5	5.2248	2.63991e-65	1.12307e-63	Up
Krt23	5.20883	3.05534e-26	2.53782e-25	Up
Cd34	5.20591	2.17382e-98	2.82347e-96	Up
Tubb4a	5.19769	4.21868e-24	3.18015e-23	Up
Lamc2	5.18906	2.30889e-83	1.81217e-81	Up
S100a11	5.18641	6.12463e-89	5.95306e-87	Up
Neurl1	5.1786	3.04318e-12	1.16618e-11	Up
Pkp1	5.17817	1.36499e-12	5.35526e-12	Up
Clec3b	5.17087	3.6833e-22	2.51792e-21	Up
Ch25h	5.16546	6.73626e-26	5.5172e-25	Up
Aoc1	5.15668	1.23717e-36	1.71463e-35	Up
Ccn2	5.15113	1.17531e-78	7.66667e-77	Up
Nectin4	5.14499	1.3834e-18	7.80928e-18	Up
Rab25	5.12394	2.63302e-48	5.75073e-47	Up
Cspg4	5.11668	3.42664e-41	5.74118e-40	Up
Gpr176	5.10131	1.12269e-33	1.32245e-32	Up
Hydin	5.09924	1.1507e-58	3.91851e-57	Up
Mybpc2	5.09785	1.75554e-38	2.65355e-37	Up
Edn1	5.08568	3.54333e-45	7.06596e-44	Up
Fzd2	5.07228	5.26299e-96	6.28007e-94	Up
Klf5	5.06721	4.62029e-58	1.52387e-56	Up
Stx11	5.06061	3.90606e-67	1.76398e-65	Up
Col15a1	5.0557	8.49795e-44	1.5748e-42	Up
Nfasc	5.0465	1.6443e-16	8.20305e-16	Up
Gpr37l1	5.04452	2.11679e-20	1.32374e-19	Up
Bcat1	5.01103	4.21961e-20	2.59778e-19	Up
Thbs4	5.00029	4.15871e-70	2.04138e-68	Up
Htra3	4.99418	4.84962e-45	9.56691e-44	Up
Odad1	4.99348	1.71634e-17	9.09412e-17	Up
Vwa7	4.98076	1.14991e-43	2.11494e-42	Up
St14	4.97707	4.83742e-89	4.73326e-87	Up
Slc1a1	4.97385	1.32065e-15	6.22855e-15	Up
Ppp2r2c	4.97167	1.02499e-33	1.21517e-32	Up
Arhgef38	4.96765	9.25269e-44	1.71035e-42	Up
Slit3	4.96594	9.25105e-98	1.1705e-95	Up
Cd9	4.96012	2.3596e-82	1.80374e-80	Up
Plod2	4.95435	1.12359e-100	1.57056e-98	Up
Mmp11	4.92892	1.81821e-53	5.03507e-52	Up
Grip1	4.91461	3.02598e-25	2.40067e-24	Up
Ttc9	4.90383	1.35033e-35	1.78066e-34	Up
Kif12	4.88188	6.27042e-141	2.55642e-138	Up
A3galt2	4.88043	7.25828e-82	5.46307e-80	Up
Kcnk1	4.87846	1.77293e-36	2.43646e-35	Up
Msi1	4.8754	2.81851e-17	1.47057e-16	Up
Megf10	4.86321	2.95481e-20	1.83218e-19	Up
Cyp1b1	4.86139	5.29922e-24	3.97835e-23	Up
Clec5a	4.84707	2.32605e-15	1.08002e-14	Up
Itgb4	4.84538	2.93252e-116	6.62163e-114	Up
Nos2	4.83834	1.06073e-14	4.71484e-14	Up
Agbl4	4.82737	2.77916e-24	2.10691e-23	Up
Prrx1	4.82646	2.96778e-38	4.44017e-37	Up
Acta2	4.82632	1.13392e-48	2.52159e-47	Up
Rtkn	4.80894	1.25874e-59	4.4517e-58	Up
Itga8	4.80539	1.10539e-138	4.15995e-136	Up
Prkar1b	4.79908	7.82874e-22	5.25389e-21	Up
Ncam1	4.79715	2.9419e-32	3.25382e-31	Up
Syt5	4.78347	5.04329e-19	2.91533e-18	Up
Igfbp1	4.77294	1.38631e-14	6.11753e-14	Up
Ka11	4.76915	3.51537e-46	7.19596e-45	Up
Ppp1r1b	4.74968	3.17709e-69	1.5189e-67	Up
Cldn8	4.74241	1.62733e-17	8.64433e-17	Up
Cacnb3	4.7286	1.86182e-86	1.63628e-84	Up
Pdgfb	4.70861	2.17476e-37	3.12624e-36	Up
Cx3cl1	4.68128	7.14664e-66	3.07599e-64	Up
Galnt3	4.66503	1.73981e-19	1.03214e-18	Up
Evpl	4.66412	8.0413e-18	4.34544e-17	Up
Ccl21	4.65059	5.14142e-29	4.9128e-28	Up
Htr7	4.64564	1.03752e-24	8.01458e-24	Up
Fstl3	4.64316	1.46538e-26	1.23605e-25	Up
Arhgef28	4.64213	1.20162e-72	6.32119e-71	Up
Wnt5b	4.62781	1.0973e-21	7.31051e-21	Up
Arhgef16	4.62368	5.18974e-45	1.02241e-43	Up
Erbb2	4.62285	4.63737e-74	2.6178e-72	Up
Sfrp1	4.62241	1.77859e-111	3.30435e-109	Up
Dync2li1	4.62078	2.74576e-49	6.33641e-48	Up
B3galnt1	4.61567	1.00535e-56	3.15965e-55	Up
Thbs1	4.61145	3.83284e-64	1.58911e-62	Up
Sema5a	4.60627	9.50866e-109	1.64187e-106	Up
Maff	4.60196	1.56136e-32	1.76278e-31	Up
Dnah2	4.5812	5.42093e-22	3.67496e-21	Up
Adgrg3	4.5806	2.1167e-15	9.86874e-15	Up
Rgs1	4.56793	1.20975e-35	1.60248e-34	Up
Mapk4	4.5604	6.42442e-40	1.03276e-38	Up
Card14	4.55718	4.81387e-31	5.05026e-30	Up
Sh3tc2	4.55455	9.09344e-82	6.80941e-80	Up
Pde10a	4.54127	1.09655e-38	1.6695e-37	Up
Gpx3	4.51837	1.64955e-127	5.04383e-125	Up
Dnah11	4.51625	9.11765e-18	4.91262e-17	Up
Kcnb1	4.51591	3.21989e-18	1.78536e-17	Up
Ramp3	4.49948	3.79921e-21	2.45427e-20	Up
Prss8	4.49609	1.72195e-95	2.00579e-93	Up
Acot11	4.48874	4.29838e-17	2.21904e-16	Up
PCOLCE2	4.48406	1.97146e-15	9.20914e-15	Up
Wnt7b	4.48135	1.37967e-30	1.4111e-29	Up
Atp10a	4.46394	1.84486e-61	7.05131e-60	Up
Pmepa1	4.44818	7.10297e-39	1.08935e-37	Up
Sptbn4	4.4382	3.72477e-24	2.81072e-23	Up
Angpt4	4.41867	3.65468e-14	1.57255e-13	Up
Ifnlr1	4.40993	2.32635e-32	2.60044e-31	Up
Adamts15	4.40668	2.58791e-64	1.07906e-62	Up
Chadl	4.40044	4.06151e-21	2.61796e-20	Up
Spire2	4.39946	4.80763e-15	2.18728e-14	Up
Ddr1	4.39866	3.21165e-88	3.02163e-86	Up
Adgrg2	4.38903	7.64876e-17	3.87641e-16	Up
Bhlhe41	4.38074	9.29349e-22	6.21698e-21	Up
Mapk13	4.37771	1.90307e-28	1.76334e-27	Up
Gprc5a	4.37475	2.25475e-15	1.04924e-14	Up
Adamtsl1	4.37436	8.03394e-89	7.75751e-87	Up
Scn3a	4.37278	2.76969e-10	9.1721e-10	Up
Gpc6	4.37111	6.61136e-42	1.14025e-40	Up
Mdga1	4.36635	6.72151e-14	2.8512e-13	Up
Slc7a1	4.36207	3.06395e-51	7.71347e-50	Up
Itga3	4.36179	3.47277e-67	1.57801e-65	Up
Atp2b3	4.35223	4.29987e-12	1.62779e-11	Up
Art4	4.34848	7.18723e-88	6.6344e-86	Up
Gal3st1	4.3482	5.60736e-15	2.54088e-14	Up
Serpinb1a	4.3427	2.14974e-110	3.89528e-108	Up
Ccl12	4.34204	2.35288e-11	8.4392e-11	Up
Fbn2	4.33978	5.78838e-31	6.051e-30	Up
Itgb8	4.33919	1.5358e-81	1.14421e-79	Up
Gdpd5	4.33681	1.94562e-68	9.18193e-67	Up
Stc1	4.33235	1.25911e-20	7.95521e-20	Up
Mmrn1	4.33149	2.57898e-20	1.60661e-19	Up
Endod1	4.32915	2.2659e-61	8.61568e-60	Up
Tmem107	4.32794	1.06639e-29	1.05255e-28	Up
Col1a1	4.32497	3.17376e-49	7.27832e-48	Up
Galnt12	4.30639	5.99376e-47	1.26213e-45	Up
Prom1	4.30624	1.83005e-71	9.45762e-70	Up
Cys1	4.30605	2.33557e-16	1.1573e-15	Up
Cilp	4.293	9.93173e-24	7.34718e-23	Up
Tagln	4.2902	8.12098e-51	1.99986e-49	Up
A2m	4.28998	3.52486e-23	2.5298e-22	Up
Kcnma1	4.28883	5.86637e-11	2.04953e-10	Up
Cd200	4.28707	5.11148e-81	3.67751e-79	Up
Usp43	4.26012	3.41848e-27	2.97058e-26	Up
Mapk15	4.25741	6.85738e-13	2.73792e-12	Up
Eps8l1	4.24966	7.78975e-25	6.05883e-24	Up
Ssc5d	4.24852	2.10674e-15	9.82857e-15	Up
Fam83b	4.24447	1.95707e-40	3.2058e-39	Up
Schip1	4.23526	1.68957e-82	1.29831e-80	Up
Cdca7l	4.23346	5.83688e-29	5.56285e-28	Up
Pfkp	4.23015	4.6467e-79	3.08595e-77	Up
Hr	4.22904	3.82796e-20	2.35865e-19	Up
Epcam	4.22291	2.77922e-73	1.49416e-71	Up
Scube1	4.22268	1.15106e-19	6.8703e-19	Up
Pcyox1l	4.22076	1.58793e-36	2.19042e-35	Up
Bmp15	4.21957	1.4773e-10	5.004e-10	Up
Anxa5	4.2175	1.02738e-142	4.43496e-140	Up
Dkk2	4.21706	2.54191e-23	1.83781e-22	Up
Cnksr1	4.20559	6.71622e-24	5.02672e-23	Up
Rap1gap	4.20207	7.47192e-87	6.68691e-85	Up
Clec7a	4.1991	7.25012e-80	5.01934e-78	Up
Noxo1	4.19896	6.85362e-30	6.82432e-29	Up
Astn1	4.198	6.10296e-12	2.28503e-11	Up
Col7a1	4.19771	3.53519e-16	1.72608e-15	Up
Mme	4.19716	3.14724e-40	5.09846e-39	Up
Anxa1	4.19425	3.35997e-31	3.54269e-30	Up
Dnm3	4.19301	1.08983e-19	6.51544e-19	Up
Eda2r	4.17464	1.09271e-19	6.52999e-19	Up
Rapsn	4.16991	4.25711e-18	2.34452e-17	Up
Ccdc8	4.16479	1.36644e-35	1.80029e-34	Up
Usp13	4.16114	3.51505e-14	1.51603e-13	Up
Ptgds	4.1573	3.29297e-32	3.62029e-31	Up
Pla1a	4.12122	4.41074e-93	4.76003e-91	Up
Rgcc	4.11646	1.52942e-30	1.561e-29	Up
Cldn5	4.11631	1.9593e-24	1.49931e-23	Up
Cdh3	4.10934	3.71098e-44	6.99179e-43	Up
Trmt9b	4.10283	7.29755e-19	4.18547e-18	Up
Wnt7a	4.0916	1.39831e-22	9.73114e-22	Up
Parm1	4.08906	2.63192e-73	1.42017e-71	Up
Cryab	4.08573	6.6513e-103	1.0064e-100	Up
Wnt5a	4.08171	4.05971e-30	4.07833e-29	Up
Myof	4.07334	5.27863e-60	1.90355e-58	Up
Lyz2	4.07091	5.96888e-63	2.40014e-61	Up
Cacna1c	4.05895	6.50579e-39	9.98802e-38	Up
Slc44a3	4.04785	2.41384e-36	3.28645e-35	Up
Dkk3	4.03396	3.34721e-82	2.53232e-80	Up
Ttll10	4.02808	8.33504e-26	6.79232e-25	Up
Atp8b2	4.02695	1.04367e-125	2.94577e-123	Up
Pnoc	4.02425	7.10226e-13	2.83183e-12	Up
Dio2	4.01826	1.84547e-09	5.71916e-09	Up
Rgs5	4.01525	1.82774e-97	2.2928e-95	Up
Fhl2	4.01133	7.23539e-166	4.61712e-163	Up
Mrc2	4.00791	1.41632e-78	9.19791e-77	Up
Cd55	4.00141	6.82144e-32	7.41617e-31	Up
Il17rd	3.99316	3.48234e-63	1.40413e-61	Up
Rin1	3.99079	1.05751e-19	6.33252e-19	Up
Trpv4	3.98587	9.61243e-13	3.80479e-12	Up
Plcxd3	3.98004	5.68178e-11	1.98741e-10	Up
Jag2	3.97666	7.15938e-34	8.56384e-33	Up
Lilrb4	3.97147	8.07009e-37	1.12805e-35	Up
Lgals1	3.96671	6.08216e-71	3.04669e-69	Up
Lpl	3.95115	2.69041e-41	4.53875e-40	Up
Nhs	3.94604	1.98206e-34	2.43844e-33	Up
Phgdh	3.94454	4.70121e-35	5.99997e-34	Up
Ggt1	3.94298	1.48404e-35	1.94649e-34	Up
Cxcl16	3.93374	6.02178e-77	3.72918e-75	Up
Grem1	3.92896	3.50398e-15	1.60511e-14	Up
Btnl9	3.92634	3.74715e-12	1.42442e-11	Up
Slc27a3	3.92607	1.06305e-28	1.00015e-27	Up
Vwa1	3.92001	1.06113e-33	1.25598e-32	Up
Boc	3.91686	1.47749e-35	1.93964e-34	Up
Thy1	3.90206	7.1728e-22	4.82914e-21	Up
Vdr	3.90072	2.09003e-19	1.23541e-18	Up
Adcy2	3.89788	5.5698e-23	3.95683e-22	Up
Fkbp10	3.89414	6.51714e-65	2.74862e-63	Up
Sox4	3.88762	1.10731e-88	1.05532e-86	Up
Plat	3.88562	7.68534e-26	6.27701e-25	Up
Lgi4	3.88353	1.26452e-11	4.64101e-11	Up
Efemp2	3.87493	4.2732e-106	6.81715e-104	Up
Rsph1	3.85546	4.73524e-13	1.91089e-12	Up
Ccn3	3.85322	1.53913e-16	7.68886e-16	Up
Il17re	3.84546	1.78441e-38	2.69173e-37	Up
Shc2	3.83794	7.48525e-48	1.62037e-46	Up
Slc25a4	3.83764	4.08445e-114	8.21199e-112	Up
Azin2	3.83688	7.13348e-15	3.20472e-14	Up
Elf3	3.82759	4.2609e-66	1.85571e-64	Up
Impdh1	3.8271	2.60205e-85	2.22037e-83	Up
Kif27	3.82694	2.94928e-15	1.3595e-14	Up
Lrrc8e	3.82043	1.93347e-27	1.70129e-26	Up
Col12a1	3.81837	4.56501e-31	4.79604e-30	Up
Anxa2	3.8137	9.31393e-61	3.43469e-59	Up
Kif26a	3.81211	2.04666e-50	4.9325e-49	Up
Anxa13	3.81053	5.68271e-51	1.41365e-49	Up
Ntn4	3.80851	7.48968e-28	6.73154e-27	Up
Slc52a3	3.79498	1.32462e-39	2.10405e-38	Up
Septin5	3.79371	1.00358e-16	5.05649e-16	Up
Lum	3.78368	7.20811e-05	0.000147942	Up
Agbl2	3.7834	3.48678e-26	2.88801e-25	Up
Pdgfd	3.78034	6.42895e-43	1.15493e-41	Up
Cxcr2	3.77867	9.68964e-23	6.80129e-22	Up
Cx3cr1	3.77832	2.85529e-55	8.53504e-54	Up
Vim	3.77105	4.31159e-102	6.39204e-100	Up
Ccn1	3.76775	4.20468e-50	1.00345e-48	Up
Flrt2	3.76221	1.19474e-99	1.60873e-97	Up
Ntf4	3.7584	2.65348e-17	1.38792e-16	Up
Cd248	3.75782	6.97545e-11	2.42374e-10	Up
Clec10a	3.7509	1.40035e-62	5.55484e-61	Up
Lypd3	3.7485	2.12096e-12	8.22655e-12	Up
S100a8	3.74645	1.81749e-21	1.1962e-20	Up
Mfap4	3.73892	5.85508e-29	5.57296e-28	Up
Egln3	3.73818	1.88707e-21	1.24144e-20	Up
Col17a1	3.73594	8.34194e-20	5.02605e-19	Up
Abcc3	3.73223	8.83386e-78	5.63716e-76	Up
Btc	3.72555	4.17968e-16	2.02526e-15	Up
Kirrel1	3.72533	3.2258e-48	7.0245e-47	Up
Ubxn11	3.71789	1.3252e-16	6.63822e-16	Up
Vps37d	3.71273	1.51936e-15	7.13819e-15	Up
Arhgap28	3.70761	1.41143e-51	3.60899e-50	Up
Ninl	3.70479	1.06442e-88	1.02108e-86	Up
Itga11	3.69843	3.07144e-33	3.55517e-32	Up
Nkd2	3.69542	2.73255e-53	7.51041e-52	Up
Edil3	3.68122	1.85825e-17	9.81063e-17	Up
Liph	3.67458	1.11892e-18	6.35052e-18	Up
Ptgs2	3.67399	4.22461e-11	1.49409e-10	Up
Timp1	3.67372	9.93368e-56	3.00612e-54	Up
Rgs4	3.67127	1.57362e-21	1.03802e-20	Up
Sstr3	3.67105	2.46438e-24	1.87408e-23	Up
Micb	3.66887	1.18185e-10	4.03113e-10	Up
Degs2	3.66414	3.84964e-24	2.90345e-23	Up
Ppp1r15a	3.66359	7.77585e-18	4.20664e-17	Up
Sema3e	3.66122	2.4988e-40	4.075e-39	Up
Myh10	3.65268	2.21235e-137	8.11766e-135	Up
Fbln1	3.64392	1.35064e-41	2.30772e-40	Up
Lrrc1	3.64332	3.01106e-24	2.27918e-23	Up
Tnfrsf12a	3.63567	4.06992e-53	1.11237e-51	Up
Gjc1	3.62284	4.41471e-22	3.00532e-21	Up
Gpr173	3.60884	2.20042e-17	1.1563e-16	Up
Cpe	3.60321	1.68895e-13	6.97684e-13	Up
Myh14	3.60116	3.68637e-81	2.66527e-79	Up
Unc5b	3.59676	7.51446e-86	6.52602e-84	Up
Clcf1	3.59575	6.30722e-29	5.99554e-28	Up
Gpc2	3.58435	3.89649e-12	1.47966e-11	Up
Scn3b	3.58401	6.49753e-13	2.59848e-12	Up
Cdkn2b	3.5793	4.18784e-33	4.82456e-32	Up
C7	3.5787	8.21181e-27	7.04e-26	Up
Zfyve28	3.57526	4.48457e-09	1.35126e-08	Up
Syt7	3.57411	8.89048e-14	3.73777e-13	Up
Gpc3	3.57383	6.83739e-21	4.36315e-20	Up
Spsb1	3.57031	9.4857e-39	1.44721e-37	Up
Muc1	3.57013	4.65078e-20	2.85366e-19	Up
Sytl1	3.56968	9.93696e-16	4.71684e-15	Up
Kifc3	3.56898	2.236e-150	1.13165e-147	Up
Relb	3.56747	1.54581e-62	6.09889e-61	Up
Osmr	3.56639	3.4621e-20	2.1368e-19	Up
C1qtnf6	3.54719	8.17915e-49	1.82996e-47	Up
Rps6ka2	3.54411	1.31061e-61	5.03554e-60	Up
Vegfd	3.5437	2.67661e-18	1.48862e-17	Up
Nme5	3.54365	1.57009e-12	6.14513e-12	Up
Plxdc2	3.5435	1.26216e-101	1.83413e-99	Up
Ckb	3.53737	9.24666e-102	1.35713e-99	Up
Pmaip1	3.53381	4.42995e-22	3.0143e-21	Up
Car2	3.53361	1.04159e-46	2.1746e-45	Up
Rbpjl	3.53353	3.84211e-19	2.24039e-18	Up
Dbn1	3.53041	2.68304e-34	3.28432e-33	Up
Cdh13	3.51993	2.34714e-28	2.1666e-27	Up
Ptger4	3.51533	2.06888e-34	2.54101e-33	Up
Dcn	3.51521	6.39653e-18	3.48356e-17	Up
Selenom	3.50652	3.14741e-37	4.48927e-36	Up
Myb	3.50069	2.17407e-12	8.42588e-12	Up
Slitrk4	3.49811	7.21588e-11	2.50431e-10	Up
S100a10	3.49684	2.09228e-85	1.79581e-83	Up
Abo	3.49399	4.26469e-20	2.62444e-19	Up
Aebp1	3.49391	2.80974e-71	1.43688e-69	Up
E2f7	3.48322	5.18353e-13	2.08437e-12	Up
Flna	3.48248	6.37124e-58	2.09196e-56	Up
Aqp7	3.48203	1.8813e-12	7.32992e-12	Up
Pkd2	3.48163	1.38203e-86	1.22934e-84	Up
Nphp4	3.47013	4.52683e-19	2.62714e-18	Up
Pla2g7	3.46645	4.85158e-21	3.11218e-20	Up
Chst11	3.46256	2.76423e-15	1.27701e-14	Up
Il1r2	3.46121	2.24627e-09	6.90873e-09	Up
Map3k6	3.45718	1.84318e-16	9.1765e-16	Up
Thbs3	3.45378	2.71028e-18	1.5062e-17	Up
F3	3.4531	3.34385e-17	1.73603e-16	Up
Carmil1	3.44893	1.02283e-138	3.95054e-136	Up
Gja1	3.44643	7.90463e-104	1.2085e-101	Up
Svep1	3.44502	4.01366e-64	1.65939e-62	Up
Tgfb1i1	3.44201	1.25867e-36	1.74278e-35	Up
Ptgis	3.43508	3.12647e-25	2.4737e-24	Up
Pygo1	3.43452	3.5886e-16	1.74983e-15	Up
Obsl1	3.43374	1.33604e-24	1.02773e-23	Up
Il1rl1	3.42863	5.50661e-22	3.72961e-21	Up
Ccr6	3.42363	4.62953e-20	2.84299e-19	Up
Blnk	3.42243	1.39505e-44	2.6835e-43	Up
Pik3ip1	3.41443	2.20733e-45	4.43187e-44	Up
Col4a6	3.41218	1.20125e-23	8.82864e-23	Up
Scara5	3.41063	2.78779e-13	1.13846e-12	Up
Lamb1	3.40957	8.98807e-145	3.99751e-142	Up
Gpr161	3.40903	2.02669e-11	7.31212e-11	Up
Plxna3	3.40685	1.66861e-39	2.63904e-38	Up
Vwa2	3.39953	9.90123e-15	4.40632e-14	Up
Lgals3	3.39617	5.48372e-65	2.31944e-63	Up
Disp2	3.39585	2.50174e-10	8.32798e-10	Up
Kctd15	3.38772	2.19893e-18	1.23088e-17	Up
Itgax	3.38736	7.84927e-48	1.69667e-46	Up
Lbp	3.3766	3.76479e-95	4.25045e-93	Up
Igf1r	3.37218	5.47989e-49	1.2431e-47	Up
Scn2b	3.3721	1.30598e-09	4.09921e-09	Up
Gprin1	3.36743	1.98683e-09	6.14427e-09	Up
Car13	3.36695	2.4257e-17	1.27287e-16	Up
Rab7b	3.36542	2.7848e-32	3.09171e-31	Up
Adam8	3.36003	8.47348e-31	8.78906e-30	Up
Cygb	3.35725	2.67754e-129	8.5431e-127	Up
Ppl	3.356	4.91525e-76	2.94454e-74	Up
Tmsb10	3.35199	3.90449e-130	1.27347e-127	Up
Pfn2	3.3471	1.01372e-49	2.37294e-48	Up
Rgs2	3.33561	2.55341e-39	3.98261e-38	Up
Egflam	3.33458	5.21108e-18	2.84959e-17	Up
Alox5	3.32435	2.01783e-14	8.82734e-14	Up
Ltbp1	3.31738	2.84554e-73	1.52423e-71	Up
Pcolce	3.31736	1.99945e-101	2.84912e-99	Up
Kcnq1	3.31574	4.42737e-36	5.96698e-35	Up
S100a9	3.31436	1.52532e-39	2.41761e-38	Up
Col8a2	3.31285	6.23757e-39	9.58626e-38	Up
Apobec3	3.30276	9.67273e-18	5.20788e-17	Up
Enah	3.30121	2.08292e-59	7.31365e-58	Up
Krt20	3.29586	1.14523e-14	5.08118e-14	Up
Tgfb3	3.29579	9.48616e-76	5.65969e-74	Up
Ggt7	3.2948	1.59429e-14	7.01209e-14	Up
Akr1b8	3.29155	5.05525e-12	1.90295e-11	Up
Ephb3	3.28769	1.45603e-29	1.42088e-28	Up
Vldlr	3.28759	2.54548e-96	3.0623e-94	Up
Slc2a10	3.28238	5.18359e-13	2.08437e-12	Up
Gjc2	3.28153	2.58437e-12	9.96083e-12	Up
Ppp1r9a	3.2792	1.06784e-48	2.37825e-47	Up
Cxcr4	3.27026	1.4879e-35	1.94981e-34	Up
Thsd7a	3.26721	1.57417e-56	4.91576e-55	Up
Gja5	3.26517	9.26043e-22	6.19769e-21	Up
Stk39	3.25511	1.05587e-39	1.68445e-38	Up
Fbn1	3.23862	3.22816e-99	4.30724e-97	Up
Plch1	3.23607	3.69391e-10	1.21098e-09	Up
Rgs10	3.23259	1.94271e-75	1.15438e-73	Up
Col8a1	3.23143	1.10335e-24	8.51416e-24	Up
Ephb1	3.22915	4.17509e-15	1.90422e-14	Up
Slc7a6	3.22328	3.21697e-52	8.35672e-51	Up
Cdh11	3.22282	2.62445e-56	8.14355e-55	Up
Mmp8	3.21874	5.48964e-21	3.51533e-20	Up
Mal	3.20926	4.84634e-19	2.80812e-18	Up
Pamr1	3.20914	4.32825e-43	7.80414e-42	Up
Rnd1	3.2077	3.82999e-70	1.88634e-68	Up
Slc38a1	3.20696	2.51234e-20	1.56576e-19	Up
Tubb6	3.19766	5.4078e-85	4.53544e-83	Up
Anxa8	3.19634	8.73344e-12	3.23757e-11	Up
Tspo	3.19286	5.66334e-46	1.15285e-44	Up
Slco3a1	3.19144	3.99211e-28	3.637e-27	Up
Ccl28	3.18364	5.63437e-11	1.97176e-10	Up
Fabp4	3.1805	1.06538e-22	7.46376e-22	Up
Gsn	3.18041	3.12533e-59	1.08441e-57	Up
Baiap2l2	3.18013	1.37851e-09	4.31485e-09	Up
Irag1	3.17702	9.96794e-50	2.33705e-48	Up
Pacrg	3.17674	1.71474e-08	4.9203e-08	Up
Hacd4	3.17601	1.14051e-39	1.81555e-38	Up
Adamts5	3.17557	4.33082e-17	2.235e-16	Up
Col6a3	3.16039	7.79178e-61	2.88788e-59	Up
Kif23	3.15642	3.16446e-16	1.5523e-15	Up
Mxra8	3.15506	4.15047e-88	3.88003e-86	Up
Tagln2	3.15486	3.62284e-90	3.71835e-88	Up
Cacna2d1	3.15481	1.80208e-28	1.67294e-27	Up
Anks6	3.15315	2.20324e-23	1.60005e-22	Up
Serpine2	3.15288	3.94858e-104	6.10035e-102	Up
Tubb2b	3.14563	6.81464e-14	2.88737e-13	Up
Mcam	3.13909	1.527e-62	6.04089e-61	Up
Xylt1	3.13551	2.23861e-42	3.92078e-41	Up
Cd276	3.13095	4.4629e-107	7.4434e-105	Up
Colec12	3.1303	2.64642e-49	6.12643e-48	Up
Cma1	3.12943	8.15418e-09	2.40561e-08	Up
Kdelr3	3.12724	6.77012e-37	9.49953e-36	Up
Ltbp3	3.12619	6.13063e-49	1.38005e-47	Up
Ampd3	3.12093	4.85614e-34	5.85169e-33	Up
Hk1	3.11993	1.39633e-87	1.27291e-85	Up
Tspoap1	3.10953	1.62756e-14	7.15628e-14	Up
Bicd1	3.10616	5.41755e-51	1.34997e-49	Up
Mcemp1	3.09943	1.7749e-08	5.08494e-08	Up
Rimkla	3.09828	2.27201e-10	7.57984e-10	Up
B3gnt7	3.09391	1.90275e-19	1.12744e-18	Up
Pacsin1	3.09237	4.22339e-11	1.49402e-10	Up
Sema3g	3.08981	1.72136e-18	9.68358e-18	Up
Tgm7	3.08862	2.5827e-09	7.91363e-09	Up
Slc30a3	3.08371	3.2503e-19	1.90514e-18	Up
Ezr	3.08144	4.22901e-77	2.63005e-75	Up
Col5a2	3.07404	2.15966e-84	1.7708e-82	Up
Mtmr11	3.074	5.07965e-49	1.15409e-47	Up
Hebp2	3.07135	1.10357e-20	6.98753e-20	Up
Smarcd3	3.06937	5.77814e-21	3.69846e-20	Up
Col4a2	3.06481	1.48511e-77	9.39522e-76	Up
Adgrg6	3.06435	1.75579e-57	5.67614e-56	Up
Kif6	3.06413	1.75806e-15	8.23064e-15	Up
Itgbl1	3.05815	2.75837e-23	1.99039e-22	Up
Efna3	3.05722	1.47085e-08	4.24204e-08	Up
Adamts2	3.05627	2.43263e-48	5.32891e-47	Up
Prrg4	3.05226	1.85096e-36	2.5413e-35	Up
Cldn23	3.0515	3.1135e-12	1.19064e-11	Up
Jag1	3.04651	3.96134e-49	9.02805e-48	Up
Heyl	3.04477	4.37819e-41	7.30212e-40	Up
Wnt4	3.04243	1.80316e-26	1.51749e-25	Up
Slc12a2	3.04105	2.02311e-106	3.29924e-104	Up
Clic1	3.0405	8.31567e-108	1.40286e-105	Up
Tedc1	3.03793	4.35617e-22	2.96822e-21	Up
Ptpn14	3.0371	6.02367e-30	6.02654e-29	Up
Flrt3	3.03039	4.00935e-106	6.46652e-104	Up
Prkd1	3.02673	2.69899e-16	1.33064e-15	Up
Prdm16	3.02587	7.08682e-20	4.30162e-19	Up
Has2	3.02554	1.24866e-13	5.20049e-13	Up
Ccdc65	3.02513	2.55634e-12	9.85795e-12	Up
Unc13b	3.0219	2.57623e-73	1.40042e-71	Up
Glis2	3.01962	2.05568e-41	3.488e-40	Up
Il18r1	3.01829	2.8738e-17	1.49836e-16	Up
RragB	3.0116	7.35922e-12	2.74001e-11	Up
Oxct1	3.01097	9.96632e-62	3.85951e-60	Up
Ano1	3.00718	5.7795e-52	1.49341e-50	Up
Tnc	3.00277	1.55794e-07	4.11849e-07	Up
Ephb2	2.99827	2.58497e-18	1.43984e-17	Up
Smoc2	2.99816	1.10022e-27	9.81045e-27	Up
Cacna1a	2.998	3.69828e-13	1.49985e-12	Up
Bcl2l14	2.99222	1.4138e-09	4.4225e-09	Up
Frzb	2.99128	6.96698e-28	6.27327e-27	Up
Pxdn	2.97814	1.75254e-77	1.09923e-75	Up
Clec4d	2.97493	1.04049e-07	2.78877e-07	Up
S100a4	2.97487	6.30197e-12	2.35834e-11	Up
Atp2b4	2.97446	2.927e-61	1.11007e-59	Up
Runx1	2.97416	1.33723e-19	7.96206e-19	Up
Wnt9a	2.97313	5.64291e-12	2.11764e-11	Up
Unc13d	2.97179	4.18005e-19	2.4278e-18	Up
Lpar1	2.96633	3.87878e-18	2.14179e-17	Up
Eln	2.95784	1.8128e-35	2.36291e-34	Up
Thsd4	2.95672	2.41275e-24	1.83767e-23	Up
Prag1	2.95508	2.10031e-30	2.13478e-29	Up
Wls	2.95482	1.04263e-121	2.73263e-119	Up
Col4a1	2.95195	2.67136e-78	1.72721e-76	Up
Pvr	2.94917	2.87999e-34	3.51661e-33	Up
Sfxn3	2.94755	2.16461e-56	6.73094e-55	Up
Gpr34	2.94691	2.15873e-32	2.4186e-31	Up
Ak1	2.93975	9.7528e-25	7.5457e-24	Up
Arhgef4	2.93862	1.47481e-21	9.75033e-21	Up
Pkia	2.93223	2.10527e-42	3.69605e-41	Up
Alox15	2.93095	3.06408e-05	6.54225e-05	Up
Tpm2	2.92838	2.33012e-23	1.68885e-22	Up
Ddah2	2.92682	5.33765e-08	1.46678e-07	Up
Klc3	2.92544	4.39364e-17	2.26583e-16	Up
Tpm1	2.92332	7.17871e-59	2.46749e-57	Up
Frem2	2.92174	3.41962e-35	4.39106e-34	Up
Tnf	2.92159	5.75925e-13	2.30889e-12	Up
Diaph3	2.9172	9.19955e-19	5.2395e-18	Up
Adamtsl2	2.91515	5.59131e-35	7.09893e-34	Up
Pkm	2.91476	6.36988e-63	2.55439e-61	Up
Egr1	2.91348	3.83346e-34	4.64605e-33	Up
Lilrb2	2.91098	7.89511e-10	2.52125e-09	Up
B4galt2	2.91017	3.12379e-14	1.35125e-13	Up
Rab27b	2.90685	7.79848e-11	2.70076e-10	Up
Dlgap1	2.90535	1.70869e-11	6.20446e-11	Up
Tusc3	2.90046	1.27676e-64	5.36933e-63	Up
Slco4a1	2.89677	5.25068e-08	1.44423e-07	Up
Rab19	2.89605	2.8104e-11	1.00434e-10	Up
Esyt3	2.89279	3.97891e-07	1.01775e-06	Up
Kitlg	2.89065	1.06439e-43	1.96012e-42	Up
Kcns3	2.87576	6.62265e-12	2.47456e-11	Up
Mt2A	2.87377	2.3445e-12	9.07204e-12	Up
Podxl	2.87318	6.62321e-93	6.99344e-91	Up
Slc2a3	2.86831	5.39015e-21	3.45464e-20	Up
Lpcat4	2.86649	1.71796e-14	7.54698e-14	Up
Slc24a3	2.86357	2.63634e-09	8.07461e-09	Up
Dnajb13	2.86066	2.61571e-10	8.68373e-10	Up
Chi3l1	2.85905	1.03954e-13	4.35424e-13	Up
St3gal2	2.85833	1.64095e-63	6.65311e-62	Up
Ldhb	2.85589	2.29566e-36	3.13427e-35	Up
Ndnf	2.85475	3.62383e-10	1.18854e-09	Up
Rhoc	2.85473	3.99019e-75	2.33323e-73	Up
Frem1	2.8547	5.08988e-50	1.20491e-48	Up
Trim35	2.85446	1.74799e-95	2.0201e-93	Up
Rab31	2.84299	1.53886e-92	1.61328e-90	Up
Steap2	2.84239	3.78968e-21	2.44919e-20	Up
Ica1	2.84077	2.84697e-37	4.07261e-36	Up
Fgfr3	2.84055	1.4248e-101	2.05018e-99	Up
Serpini1	2.83875	2.89039e-10	9.55457e-10	Up
Pld2	2.83451	2.19031e-42	3.84076e-41	Up
Nlgn2	2.83435	4.4068e-22	3.00133e-21	Up
Dpp7	2.83432	5.61594e-90	5.68449e-88	Up
Neb	2.83164	5.53479e-18	3.02323e-17	Up
Spon1	2.82727	1.04402e-33	1.23673e-32	Up
Itpr3	2.82518	8.76624e-27	7.49343e-26	Up
Fosl1	2.82388	3.82202e-11	1.35432e-10	Up
Zfp462	2.8235	6.30243e-55	1.85002e-53	Up
Clec12a	2.80585	2.82767e-29	2.73038e-28	Up
Aldh18a1	2.80559	4.16527e-28	3.79006e-27	Up
Basp1	2.80308	8.204e-35	1.02915e-33	Up
Pmp22	2.80127	7.32121e-46	1.48827e-44	Up
Syt11	2.79883	3.09196e-20	1.91319e-19	Up
Stil	2.79678	6.81166e-14	2.88694e-13	Up
Plau	2.7955	1.32011e-61	5.0588e-60	Up
Brsk1	2.79495	2.53511e-15	1.17523e-14	Up
Aldoc	2.79037	4.92819e-12	1.85655e-11	Up
Arhgap20	2.78516	1.24195e-10	4.23025e-10	Up
Adap1	2.77979	6.15339e-22	4.15616e-21	Up
Mmp23	2.77933	2.89437e-24	2.19199e-23	Up
Dlg4	2.77859	4.03005e-26	3.32859e-25	Up
Hbegf	2.77266	6.56349e-13	2.62271e-12	Up
Megf6	2.77238	8.26214e-15	3.69368e-14	Up
Racgap1	2.7701	3.28359e-18	1.81999e-17	Up
Adgrd1	2.76952	1.13258e-11	4.17135e-11	Up
Plk4	2.76827	9.24892e-20	5.55882e-19	Up
Cd6	2.76465	8.19675e-11	2.83267e-10	Up
Mmp2	2.75902	1.79116e-122	4.77979e-120	Up
B4galt5	2.75766	6.66653e-61	2.49604e-59	Up
Flnc	2.75634	1.15378e-10	3.94089e-10	Up
Sema3f	2.75283	2.38298e-39	3.73265e-38	Up
Enc1	2.75225	1.06623e-33	1.26101e-32	Up
Cd33	2.75157	1.0852e-19	6.49041e-19	Up
Osbpl10	2.74982	9.23329e-16	4.38993e-15	Up
Papss1	2.74955	8.72652e-66	3.73408e-64	Up
Scd2	2.74885	7.00569e-60	2.50176e-58	Up
Per3	2.74859	2.34728e-11	8.42116e-11	Up
Nid1	2.74609	1.08018e-80	7.65881e-79	Up
Numbl	2.74529	7.12165e-14	3.01484e-13	Up
Agtpbp1	2.74291	1.63956e-34	2.02728e-33	Up
Gspt2	2.74279	1.80915e-12	7.0563e-12	Up
Cblc	2.74196	6.66166e-36	8.93722e-35	Up
Gpr153	2.74128	3.88684e-29	3.72128e-28	Up
Klf6	2.73886	1.02877e-79	7.05575e-78	Up
Dynlt1	2.73585	6.28228e-30	6.281e-29	Up
Chst1	2.73313	1.81559e-13	7.48101e-13	Up
Kcnn4	2.72883	4.42796e-13	1.78836e-12	Up
C1qtnf5	2.72821	4.72653e-34	5.70487e-33	Up
Hey2	2.7257	2.10121e-10	7.03456e-10	Up
Miga1	2.72452	5.7395e-20	3.50613e-19	Up
Uhrf1	2.72142	2.86462e-21	1.86283e-20	Up
Batf	2.71681	4.33296e-08	1.20172e-07	Up
Fbxo32	2.71418	8.16644e-61	3.01911e-59	Up
Bex3	2.71279	9.21802e-38	1.34754e-36	Up
Ccl7	2.71214	3.06175e-07	7.90592e-07	Up
B4galt4	2.71044	2.42932e-18	1.35663e-17	Up
Ptn	2.70952	1.80997e-34	2.23422e-33	Up
Cnn2	2.70402	2.4842e-41	4.20054e-40	Up
Ptpn13	2.70283	2.43609e-67	1.11385e-65	Up
Aqp5	2.69983	0.000491765	0.000924627	Up
Vash2	2.69939	4.55675e-08	1.26164e-07	Up
Tox	2.69919	7.16775e-10	2.29596e-09	Up
Cenpi	2.69864	5.73807e-10	1.85257e-09	Up
Sspn	2.69687	9.87012e-17	4.97643e-16	Up
Rab42	2.69479	1.32932e-20	8.38801e-20	Up
Mthfd1l	2.69222	7.36929e-19	4.22496e-18	Up
Col1a2	2.68889	1.96103e-41	3.33125e-40	Up
Gpnmb	2.68801	1.56333e-28	1.45497e-27	Up
Adcy7	2.68726	1.31392e-47	2.81524e-46	Up
Cenpf	2.68664	5.91461e-16	2.84246e-15	Up
Lamb2	2.68284	5.89731e-87	5.31011e-85	Up
Syne4	2.6786	9.16221e-09	2.69109e-08	Up
Tead4	2.67639	4.64845e-16	2.24647e-15	Up
Dctd	2.67147	2.4488e-17	1.28407e-16	Up
Npr2	2.6711	7.79101e-35	9.79012e-34	Up
Dact1	2.6684	2.58123e-23	1.86532e-22	Up
Spns2	2.66813	5.32445e-90	5.42687e-88	Up
Nfkb2	2.66523	3.08321e-93	3.35202e-91	Up
Ckap4	2.66416	6.5776e-31	6.86137e-30	Up
Nos1	2.65836	2.20566e-09	6.78669e-09	Up
Ctse	2.65157	7.94209e-40	1.27256e-38	Up
Clip2	2.65019	3.95848e-41	6.60963e-40	Up
Siglec8	2.64947	3.61597e-09	1.09743e-08	Up
Fbxl19	2.64128	4.96603e-19	2.87407e-18	Up
Clic5	2.6409	1.02935e-12	4.0678e-12	Up
Lypd1	2.63891	1.95708e-07	5.13388e-07	Up
Tnfaip3	2.63813	2.18135e-88	2.06553e-86	Up
Chaf1b	2.63566	1.72739e-13	7.12962e-13	Up
Tpsb2	2.63317	3.13067e-05	6.6786e-05	Up
Bcl2	2.63255	5.6521e-54	1.62023e-52	Up
Csf3r	2.63055	2.80223e-16	1.38061e-15	Up
Agpat4	2.6299	3.96624e-25	3.11797e-24	Up
Ndrg1	2.62974	3.5531e-37	5.05319e-36	Up
Plaur	2.62841	1.18656e-13	4.94889e-13	Up
Slc4a4	2.62742	1.74281e-58	5.82669e-57	Up
Aqp1	2.62726	6.8513e-24	5.12259e-23	Up
Ppp1r14c	2.62291	4.83252e-08	1.33497e-07	Up
Entpd2	2.62279	1.33199e-76	8.14566e-75	Up
Kctd1	2.62231	3.32371e-17	1.72619e-16	Up
Birc3	2.62198	1.54636e-69	7.46578e-68	Up
Lmcd1	2.61545	1.21026e-37	1.76394e-36	Up
Rragd	2.61493	3.01939e-25	2.39673e-24	Up
Pkib	2.61485	7.30253e-22	4.91423e-21	Up
Setd7	2.6101	3.5414e-43	6.40112e-42	Up
Heph	2.61001	1.84e-45	3.70449e-44	Up
Fgfr1	2.60998	1.56186e-79	1.06127e-77	Up
Orai2	2.60755	1.54341e-34	1.91001e-33	Up
Pea15	2.60586	6.54591e-71	3.26783e-69	Up
Lamb3	2.60287	1.67185e-18	9.41227e-18	Up
Tnk1	2.60218	4.6265e-18	2.53938e-17	Up
Eif5a2	2.5975	6.6948e-35	8.44881e-34	Up
Plekhg2	2.59693	8.96845e-31	9.26972e-30	Up
Wnk3	2.59395	7.51404e-09	2.22615e-08	Up
Slc1a5	2.59095	1.41569e-26	1.19758e-25	Up
Knstrn	2.5903	6.0128e-10	1.93743e-09	Up
Col5a3	2.5881	6.77913e-14	2.87481e-13	Up
Plscr1	2.58773	4.63136e-28	4.20634e-27	Up
Mthfd2	2.5854	2.74824e-12	1.0573e-11	Up
Kif3c	2.57958	1.52098e-23	1.11283e-22	Up
Lgals2	2.57529	7.57695e-12	2.81965e-11	Up
Iqgap1	2.57419	1.3579e-52	3.57809e-51	Up
Plcb4	2.57228	7.47241e-67	3.3539e-65	Up
Antxr1	2.57204	3.81099e-23	2.72982e-22	Up
Septin8	2.57112	5.83254e-52	1.50447e-50	Up
Lrrc49	2.571	4.47417e-26	3.68504e-25	Up
Atf3	2.56181	1.38676e-26	1.17379e-25	Up
Serpinh1	2.56073	8.26319e-80	5.69384e-78	Up
Osbpl5	2.55936	2.34961e-39	3.68432e-38	Up
Pole2	2.55819	3.55087e-09	1.07812e-08	Up
Tagap	2.55794	2.6496e-16	1.30673e-15	Up
Emp2	2.55717	1.43208e-31	1.53533e-30	Up
Ggt6	2.55289	9.98027e-07	2.46144e-06	Up
Gpx8	2.55287	3.11475e-25	2.46576e-24	Up
Dtl	2.55051	1.48347e-10	5.02144e-10	Up
Runx2	2.5498	4.97818e-18	2.72833e-17	Up
Ctbp2	2.54978	5.87297e-73	3.11182e-71	Up
Arhgef25	2.54599	1.62569e-21	1.07141e-20	Up
Arhgef10	2.54414	1.57287e-58	5.31911e-57	Up
Hspa1b	2.53834	3.69814e-16	1.80025e-15	Up
Ptpre	2.53787	3.47791e-37	4.95105e-36	Up
Angpt1	2.53439	9.03895e-37	1.25987e-35	Up
Car11	2.53034	8.47818e-15	3.78911e-14	Up
Iqgap3	2.5226	1.3473e-13	5.60499e-13	Up
Trpm4	2.52057	2.07737e-33	2.42558e-32	Up
Dpysl3	2.52025	2.85195e-19	1.67499e-18	Up
Haghl	2.51814	7.10256e-10	2.27657e-09	Up
Tmem43	2.51803	1.61509e-45	3.26062e-44	Up
Ehd2	2.51711	7.47129e-41	1.23765e-39	Up
Stx1a	2.51664	3.04123e-07	7.85571e-07	Up
Tnfrsf18	2.51183	2.4336e-08	6.89802e-08	Up
Ddr2	2.50738	2.34776e-16	1.16294e-15	Up
Sncaip	2.49959	2.12585e-09	6.54797e-09	Up
Tnik	2.49409	2.64426e-28	2.43474e-27	Up
Abcc1	2.49321	5.79102e-75	3.35948e-73	Up
Kif4a	2.489	1.27352e-17	6.81177e-17	Up
Chpf	2.48714	4.32583e-27	3.74132e-26	Up
Asns	2.48682	1.39965e-16	7.00636e-16	Up
C1qtnf7	2.48436	2.69163e-17	1.40688e-16	Up
Zfp13	2.47775	1.10753e-06	2.71691e-06	Up
Pdlim7	2.47587	3.91976e-16	1.90561e-15	Up
Sparcl1	2.47216	1.57325e-59	5.55061e-58	Up
H1f1	2.46678	7.47166e-16	3.57204e-15	Up
Acss1	2.4644	1.43714e-37	2.07812e-36	Up
Cysltr1	2.4607	9.06627e-24	6.72049e-23	Up
Pdk3	2.45661	1.33395e-29	1.3061e-28	Up
Alox5ap	2.45341	6.78786e-14	2.87769e-13	Up
Cxcl1	2.453	2.69244e-15	1.24502e-14	Up
Sntb1	2.45	5.1066e-40	8.22718e-39	Up
Rcn1	2.4492	2.61221e-60	9.46652e-59	Up
Kcnj2	2.44816	1.79456e-39	2.83213e-38	Up
Gadd45b	2.44646	5.16311e-15	2.34392e-14	Up
Ccdc88c	2.44489	3.90464e-29	3.73588e-28	Up
Ndc80	2.44303	3.59118e-12	1.3669e-11	Up
Col16a1	2.44021	3.4296e-16	1.67787e-15	Up
Abcd2	2.43925	4.41128e-08	1.22248e-07	Up
Tnfrsf19	2.43843	3.95177e-05	8.33935e-05	Up
Arhgef17	2.43813	1.72334e-73	9.40276e-72	Up
Ltb	2.43644	5.22293e-28	4.73191e-27	Up
Mical1	2.43268	5.64825e-22	3.82377e-21	Up
Apbb1	2.43238	1.20839e-33	1.42226e-32	Up
Slc16a3	2.4304	3.2998e-15	1.51395e-14	Up
Krt8	2.42797	9.60166e-58	3.13861e-56	Up
Ace2	2.4254	2.50387e-10	8.33318e-10	Up
Pdgfa	2.41964	9.35908e-33	1.05908e-31	Up
Ifitm2	2.41792	1.57151e-76	9.57057e-75	Up
Sting1	2.41396	8.49794e-12	3.15199e-11	Up
Scn7a	2.41238	6.20986e-07	1.56009e-06	Up
Lca5	2.41082	8.17426e-14	3.44653e-13	Up
Galnt7	2.40977	8.83559e-31	9.13883e-30	Up
Synpo	2.40948	9.84413e-54	2.77851e-52	Up
Ednrb	2.40643	4.08906e-35	5.2415e-34	Up
Ehd4	2.40402	3.31257e-58	1.10497e-56	Up
Fosl2	2.4039	2.77317e-34	3.389e-33	Up
Dusp4	2.40389	3.14363e-13	1.27951e-12	Up
Clspn	2.4031	3.35723e-09	1.02101e-08	Up
Lmod1	2.4027	5.52649e-10	1.78622e-09	Up
Cep72	2.40205	1.45697e-08	4.20529e-08	Up
Aspn	2.40174	1.2103e-08	3.52313e-08	Up
Tmeff2	2.40047	2.12591e-06	5.07184e-06	Up
Prickle1	2.39927	1.30753e-53	3.64147e-52	Up
Slc1a2	2.39831	9.60879e-09	2.81887e-08	Up
Efhc1	2.39678	9.0516e-13	3.58958e-12	Up
Lpcat1	2.39631	1.02278e-44	1.98825e-43	Up
Wt1	2.39391	5.06235e-10	1.64163e-09	Up
Mcm3	2.39324	2.59044e-29	2.50295e-28	Up
Clec11a	2.39056	1.69401e-23	1.23512e-22	Up
Foxp3	2.39049	7.05936e-07	1.76358e-06	Up
Eno2	2.38967	2.47492e-14	1.0766e-13	Up
Kif22	2.38827	2.06907e-09	6.38246e-09	Up
Musk	2.38489	2.60473e-09	7.97947e-09	Up
Jaml	2.38387	2.27918e-24	1.73684e-23	Up
Kif9	2.3801	4.03619e-08	1.12323e-07	Up
Cenpe	2.37935	8.68576e-14	3.65484e-13	Up
Gfpt2	2.37683	1.50293e-15	7.0655e-15	Up
Dsg1	2.37586	3.67463e-14	1.58021e-13	Up
Gmds	2.37566	1.18006e-10	4.02596e-10	Up
Gria2	2.37511	3.88203e-05	8.20278e-05	Up
Scarf2	2.37224	4.44942e-18	2.44493e-17	Up
Tpm4	2.37163	3.65066e-42	6.34092e-41	Up
Smpd3	2.36844	1.26586e-27	1.12396e-26	Up
Sh3bp4	2.3664	2.71104e-32	3.01211e-31	Up
Lyl1	2.36525	9.76863e-11	3.35143e-10	Up
Plxnb1	2.36003	1.46937e-73	8.10752e-72	Up
Rapgef3	2.35776	6.34018e-20	3.85959e-19	Up
Nab2	2.34997	1.62585e-20	1.02064e-19	Up
Adamts3	2.34929	2.09145e-09	6.44878e-09	Up
Tet1	2.34832	4.00177e-28	3.64355e-27	Up
Polr1g	2.34682	1.46368e-20	9.20807e-20	Up
Cplane1	2.34291	3.01868e-44	5.7168e-43	Up
Kcnk13	2.34035	1.0064e-18	5.71854e-18	Up
Cavin1	2.33996	1.07006e-26	9.1098e-26	Up
Unc79	2.33823	5.72715e-07	1.44489e-06	Up
Col4a5	2.3377	3.40332e-42	5.91831e-41	Up
Ncaph	2.33228	9.0452e-16	4.30468e-15	Up
Prmt2	2.33171	1.43929e-34	1.78266e-33	Up
Vash1	2.32618	3.10326e-40	5.03277e-39	Up
Myrip	2.32467	8.04076e-07	1.99855e-06	Up
Orc1	2.32341	1.52391e-09	4.7578e-09	Up
Galnt15	2.32317	3.88627e-05	8.21057e-05	Up
Gab2	2.32228	5.98905e-45	1.17515e-43	Up
Osbpl3	2.31456	1.39693e-20	8.79567e-20	Up
Bub1b	2.31241	1.96444e-11	7.10149e-11	Up
Slc37a1	2.31063	1.58247e-19	9.39939e-19	Up
Uggt2	2.30955	4.61796e-22	3.13641e-21	Up
Zc3h12a	2.30803	2.79314e-25	2.21954e-24	Up
Cited4	2.30449	1.42258e-07	3.77221e-07	Up
Chtf18	2.29747	9.29778e-08	2.50162e-07	Up
Ttc26	2.29472	1.20743e-28	1.13092e-27	Up
RT1-M3-1	2.29052	6.13648e-33	7.00896e-32	Up
Nck2	2.28901	3.10685e-32	3.42337e-31	Up
Mcm5	2.28564	1.29675e-17	6.93098e-17	Up
Obscn	2.28377	1.50884e-09	4.71277e-09	Up
Plk1	2.28205	2.04989e-07	5.37254e-07	Up
Tnfrsf21	2.27933	4.02659e-27	3.48662e-26	Up
Lgals3bp	2.27925	6.45094e-75	3.72758e-73	Up
Tmbim1	2.27797	9.96552e-60	3.5415e-58	Up
Il2ra	2.27785	3.36006e-07	8.64276e-07	Up
Cd84	2.2757	1.12013e-24	8.6391e-24	Up
Slc10a6	2.27497	1.74437e-12	6.8127e-12	Up
Dram1	2.27396	1.9078e-27	1.68173e-26	Up
Ablim3	2.27212	1.52548e-29	1.48668e-28	Up
Arhgap22	2.27207	4.42507e-17	2.28124e-16	Up
Rgs16	2.26664	3.48184e-08	9.7469e-08	Up
F2r	2.26418	4.3559e-59	1.50782e-57	Up
Fmn1	2.26306	3.20547e-24	2.42508e-23	Up
Camk2d	2.26224	1.00259e-47	2.16081e-46	Up
Arhgef40	2.26151	5.2125e-38	7.71987e-37	Up
Rtn4	2.26045	1.73935e-18	9.78102e-18	Up
Rad54l	2.25898	6.99439e-12	2.6108e-11	Up
Dpysl2	2.25518	8.40589e-71	4.16802e-69	Up
Gpr65	2.25459	1.98181e-26	1.66592e-25	Up
Kcna3	2.24947	1.52375e-20	9.57364e-20	Up
Bmx	2.24903	1.64016e-07	4.32806e-07	Up
Duox1	2.24419	6.25248e-05	0.000129105	Up
Des	2.2402	3.54785e-19	2.07457e-18	Up
Ubd	2.23988	2.10927e-09	6.50101e-09	Up
Mef2c	2.23935	1.78446e-38	2.69173e-37	Up
Hvcn1	2.23921	7.3014e-35	9.19851e-34	Up
Fgd3	2.23742	2.27409e-26	1.90724e-25	Up
Castor1	2.23387	1.48297e-10	5.0209e-10	Up
Far1	2.2271	5.6486e-49	1.27742e-47	Up
Amot	2.21888	4.99072e-34	6.004e-33	Up
Mki67	2.21579	3.40497e-22	2.33527e-21	Up
Igsf7	2.21536	6.47712e-15	2.91968e-14	Up
Robo2	2.2146	1.37456e-37	1.99156e-36	Up
Ect2	2.2142	9.42314e-13	3.73087e-12	Up
Gca	2.20423	2.88752e-14	1.25163e-13	Up
Ube2c	2.20391	2.86976e-07	7.42847e-07	Up
Cyba	2.20059	1.49018e-35	1.95106e-34	Up
Ucp2	2.20035	1.32889e-37	1.92919e-36	Up
Kif15	2.19729	7.65133e-19	4.38495e-18	Up
Syngap1	2.19436	2.30778e-16	1.14391e-15	Up
Gli2	2.1934	4.82864e-06	1.11413e-05	Up
Timp2	2.19262	5.76865e-66	2.49754e-64	Up
Igfbp7	2.19056	2.68223e-57	8.59544e-56	Up
Fos	2.19051	3.49911e-08	9.78964e-08	Up
Vcam1	2.18983	5.71027e-68	2.6522e-66	Up
Lpar4	2.18784	2.57412e-08	7.28085e-08	Up
Cdca5	2.18656	2.16356e-07	5.65832e-07	Up
Scn5a	2.18621	6.9264e-09	2.05912e-08	Up
Grhl2	2.18547	5.86804e-23	4.16466e-22	Up
App	2.18286	2.36917e-68	1.1145e-66	Up
Auts2	2.18139	1.47526e-11	5.38469e-11	Up
Fstl1	2.18136	9.30481e-58	3.04836e-56	Up
Gpsm1	2.18015	4.6448e-28	4.21594e-27	Up
Dsel	2.17941	4.765e-34	5.74658e-33	Up
Serpinb9	2.1794	4.1617e-58	1.37881e-56	Up
Cplx2	2.17662	3.23064e-17	1.68023e-16	Up
Lamc1	2.17547	2.71279e-49	6.27019e-48	Up
Nmt2	2.17506	1.18249e-29	1.16558e-28	Up
Eya2	2.17458	2.21015e-08	6.29016e-08	Up
Abr	2.17291	1.96103e-57	6.32572e-56	Up
Trim59	2.17249	1.44097e-18	8.1249e-18	Up
Nuf2	2.17024	2.11088e-10	7.06531e-10	Up
Trip13	2.16835	9.43598e-08	2.53741e-07	Up
Nr4a1	2.16832	4.45869e-12	1.68487e-11	Up
Thbs2	2.16811	1.66083e-32	1.87363e-31	Up
Card11	2.1674	3.53486e-16	1.72608e-15	Up
Cdca7	2.16098	1.46985e-13	6.09063e-13	Up
Agrn	2.1592	3.31049e-65	1.40428e-63	Up
Procr	2.15894	1.0728e-14	4.76704e-14	Up
Knl1	2.1576	1.50946e-28	1.40663e-27	Up
Pou2f2	2.15272	4.19206e-08	1.16462e-07	Up
Elmo1	2.15239	7.14066e-31	7.43287e-30	Up
Il2rg	2.14774	1.49568e-16	7.47944e-16	Up
Bak1	2.14656	6.7993e-32	7.39758e-31	Up
Clstn1	2.14594	5.47674e-45	1.07606e-43	Up
Spn	2.14482	4.54891e-11	1.60453e-10	Up
Grb10	2.14463	1.51986e-31	1.62351e-30	Up
Csf1	2.14308	9.35062e-60	3.33105e-58	Up
Tspan15	2.14306	9.44838e-25	7.31788e-24	Up
Qsox1	2.13895	5.48701e-31	5.74004e-30	Up
Bbs7	2.13883	9.48673e-38	1.38544e-36	Up
Map3k12	2.13678	1.01834e-22	7.14106e-22	Up
Hs3st1	2.13465	7.44587e-18	4.03407e-17	Up
Espl1	2.13328	8.99876e-08	2.42517e-07	Up
P2ry12	2.13062	2.93315e-25	2.32953e-24	Up
Dync2i2	2.13034	1.95402e-23	1.42046e-22	Up
Serpinb6b	2.12948	2.07235e-16	1.03e-15	Up
Ramp1	2.12587	2.83233e-27	2.47294e-26	Up
C1qtnf2	2.12562	8.447e-11	2.91367e-10	Up
Kif7	2.12547	5.835e-18	3.18484e-17	Up
RT1-Bb	2.12314	5.75231e-14	2.44999e-13	Up
Kirrel3	2.12125	5.02245e-06	1.15721e-05	Up
Osbpl6	2.12118	2.29319e-15	1.06611e-14	Up
Cpa3	2.12025	7.97892e-07	1.98351e-06	Up
Sparc	2.11884	1.36216e-64	5.71211e-63	Up
Agbl3	2.11851	3.74349e-09	1.13495e-08	Up
Per1	2.11643	6.05085e-15	2.73425e-14	Up
Trpv2	2.11579	2.37246e-16	1.17399e-15	Up
Entpd1	2.11557	1.45606e-41	2.48494e-40	Up
Hspa2	2.1155	1.78584e-06	4.29333e-06	Up
Slc10a2	2.10937	1.46215e-21	9.67101e-21	Up
Cbx6	2.10923	7.2668e-34	8.67818e-33	Up
Anxa7	2.10889	7.33725e-36	9.80772e-35	Up
Dennd2d	2.10397	8.84245e-34	1.05256e-32	Up
Prc1	2.10327	5.95854e-11	2.07925e-10	Up
Sema4a	2.10047	8.7463e-40	1.39836e-38	Up
Fmo2	2.09736	2.12174e-09	6.53667e-09	Up
Kifc1	2.09471	7.52211e-09	2.22809e-08	Up
Cpne7	2.09466	1.28039e-23	9.39145e-23	Up
Prkar2b	2.09008	2.75293e-10	9.11865e-10	Up
Tonsl	2.08734	1.79439e-06	4.31246e-06	Up
Chst14	2.08519	1.00241e-09	3.17486e-09	Up
Gbp5	2.08372	7.31723e-17	3.7148e-16	Up
Nlrc4	2.08217	3.86288e-32	4.2405e-31	Up
Fxyd6	2.07953	1.39075e-36	1.92024e-35	Up
Mt1	2.07893	2.40557e-10	8.0224e-10	Up
Mcoln3	2.07727	6.97198e-06	1.58378e-05	Up
RT1-DMa	2.07407	1.43081e-38	2.16719e-37	Up
Dnah1	2.07242	3.47635e-18	1.92465e-17	Up
Fut4	2.0719	2.16938e-20	1.35604e-19	Up
Rad51	2.07135	8.47117e-14	3.56761e-13	Up
P2ry6	2.06826	3.6685e-17	1.89854e-16	Up
Ptk2b	2.0665	1.28771e-28	1.20457e-27	Up
Mboat1	2.06217	6.55744e-44	1.21982e-42	Up
Prelid3a	2.06197	1.81038e-06	4.34948e-06	Up
Akr1b1	2.06023	1.51999e-42	2.69106e-41	Up
Anln	2.05986	8.91503e-14	3.74702e-13	Up
Synj2	2.05724	2.3282e-36	3.17574e-35	Up
Clec4a2	2.05602	2.40983e-06	5.71945e-06	Up
Arhgap27	2.05144	2.62345e-26	2.19398e-25	Up
Spock2	2.04839	6.55957e-06	1.49379e-05	Up
Fmnl3	2.04787	5.99168e-53	1.60768e-51	Up
Ncf1	2.04702	1.22655e-37	1.78592e-36	Up
Nid2	2.04686	1.71928e-30	1.75235e-29	Up
Spsb4	2.0445	9.69621e-10	3.07501e-09	Up
Lat2	2.04093	6.87668e-11	2.39055e-10	Up
Cip2a	2.03984	6.62698e-11	2.30593e-10	Up
Lin9	2.03846	3.0333e-18	1.6838e-17	Up
Tnfrsf14	2.03667	6.12658e-11	2.13688e-10	Up
Sprn	2.03537	1.77829e-09	5.52029e-09	Up
Hivep2	2.03378	1.89861e-31	2.01635e-30	Up
Cldn15	2.03335	8.52431e-05	0.000173597	Up
Cav1	2.03102	3.06419e-15	1.40938e-14	Up
Dusp10	2.02439	3.76967e-10	1.23499e-09	Up
Klf4	2.02309	2.44574e-11	8.76156e-11	Up
Rsph9	2.02207	1.15386e-17	6.18299e-17	Up
Ston1	2.02105	9.68029e-16	4.59798e-15	Up
Plekha2	2.02071	8.18193e-35	1.02726e-33	Up
Notch4	2.02002	1.84565e-17	9.74759e-17	Up
Cyth3	2.01699	3.09845e-49	7.11673e-48	Up
Dync2h1	2.01577	4.55625e-53	1.23837e-51	Up
Gpx7	2.01551	7.08852e-18	3.84899e-17	Up
Prkag3	2.01067	6.13145e-05	0.000126748	Up
Col4a3	2.01012	3.57262e-28	3.26497e-27	Up
Rbp7	2.00841	1.39608e-05	3.08345e-05	Up
Tnfrsf4	2.00302	1.97196e-05	4.28523e-05	Up
Slco1a5	-2.00447	4.13422e-10	1.3487e-09	Down
Col13a1	-2.00843	2.35106e-13	9.64138e-13	Down
Scly	-2.0106	3.03182e-31	3.20129e-30	Down
Rpp21	-2.01481	1.0201e-33	1.21035e-32	Down
Car14	-2.01509	2.38314e-46	4.91255e-45	Down
Thrb	-2.01582	3.33162e-54	9.56913e-53	Down
Fitm2	-2.01818	8.03274e-38	1.17661e-36	Down
Ambp	-2.019	1.44885e-49	3.38073e-48	Down
Cfhr2	-2.02095	1.80272e-32	2.02592e-31	Down
Akr1d1	-2.0247	2.44327e-14	1.06315e-13	Down
Dcaf11	-2.02668	4.81777e-50	1.14418e-48	Down
Anpep	-2.02766	4.2345e-25	3.32529e-24	Down
Ntf3	-2.02824	8.12856e-06	1.83712e-05	Down
Pdk1	-2.03151	2.19573e-54	6.33382e-53	Down
Asgr2	-2.03479	6.9569e-38	1.02414e-36	Down
Acot12	-2.0376	4.27535e-32	4.68278e-31	Down
Amy1	-2.0382	6.07382e-33	6.9428e-32	Down
Cyb5r3	-2.03985	4.08404e-46	8.3484e-45	Down
Fah	-2.04126	4.86705e-44	9.08826e-43	Down
Selenoi	-2.04348	1.01839e-31	1.10228e-30	Down
Nrep	-2.04594	1.66981e-24	1.28045e-23	Down
F12	-2.04733	1.23225e-52	3.25869e-51	Down
AABR07006691.1	-2.04798	3.2078e-21	2.08322e-20	Down
Vkorc1	-2.05419	2.05833e-42	3.61798e-41	Down
Hsd17b11	-2.05508	1.28425e-39	2.04213e-38	Down
Angptl4	-2.05551	0.000893366	0.0016276	Down
Etfb	-2.05926	1.89057e-55	5.66285e-54	Down
Faah	-2.06069	1.89913e-53	5.24925e-52	Down
Gcsh	-2.06472	6.93781e-50	1.63183e-48	Down
Selenop	-2.06544	9.1725e-31	9.47395e-30	Down
Car5a	-2.06858	7.22146e-25	5.62278e-24	Down
Pemt	-2.06859	8.24927e-55	2.40227e-53	Down
Cryl1	-2.07045	6.85842e-15	3.08587e-14	Down
Prg4	-2.07094	9.04295e-19	5.15696e-18	Down
Pgrmc2	-2.07127	3.49208e-67	1.58189e-65	Down
Cd164	-2.07471	1.04551e-60	3.82668e-59	Down
Hacl1	-2.07725	1.05601e-16	5.31698e-16	Down
Hebp1	-2.078	1.0541e-68	4.99068e-67	Down
Slc43a1	-2.07803	1.63158e-45	3.28938e-44	Down
Acaa1a	-2.07806	1.05128e-48	2.3485e-47	Down
Gls2	-2.07923	8.51962e-29	8.05167e-28	Down
Tmprss6	-2.07929	1.94828e-50	4.71086e-49	Down
Pdk2	-2.08172	1.99706e-36	2.73168e-35	Down
Fasn	-2.08386	3.75739e-22	2.5626e-21	Down
Ceacam1	-2.08564	5.06665e-53	1.36697e-51	Down
Atp6v0d2	-2.08689	1.26794e-05	2.8111e-05	Down
Ppif	-2.08718	7.33177e-29	6.95145e-28	Down
Gpld1	-2.08719	3.85139e-21	2.48688e-20	Down
Mpv17l	-2.08789	7.19173e-26	5.88695e-25	Down
F11	-2.08918	7.22332e-38	1.06123e-36	Down
Pdzk1	-2.09116	4.03379e-38	6.01666e-37	Down
Rfx6	-2.09187	5.81247e-07	1.46431e-06	Down
P2rx7	-2.09667	4.91997e-35	6.27371e-34	Down
Dhrs4	-2.09877	8.69036e-79	5.71966e-77	Down
Nadk2	-2.10131	6.00848e-38	8.86296e-37	Down
Gbp6	-2.10437	1.09396e-16	5.50243e-16	Down
Hamp	-2.10456	2.75342e-13	1.12506e-12	Down
Hnf4a	-2.10814	1.80294e-43	3.29127e-42	Down
Id4	-2.10825	3.43448e-55	1.0204e-53	Down
Csad	-2.10937	2.0793e-18	1.16614e-17	Down
Acox1	-2.10954	1.22381e-53	3.4148e-52	Down
Adh1	-2.11308	1.38091e-25	1.11361e-24	Down
Iqgap2	-2.11431	2.5546e-47	5.42604e-46	Down
Nr0b2	-2.11558	2.46255e-09	7.55494e-09	Down
Ahcy	-2.11834	3.44162e-46	7.05483e-45	Down
Ak2	-2.12001	2.22806e-51	5.65766e-50	Down
Lpar3	-2.12079	3.28124e-08	9.20115e-08	Down
Ggct	-2.1217	9.31364e-53	2.48088e-51	Down
Sord	-2.12462	4.14116e-31	4.3601e-30	Down
Haao	-2.13068	2.0597e-48	4.53226e-47	Down
Slc16a7	-2.13167	9.63651e-31	9.93223e-30	Down
Fbp1	-2.13523	4.66971e-50	1.11082e-48	Down
Abcc6	-2.14215	6.72512e-50	1.58434e-48	Down
Hibadh	-2.14218	4.84808e-53	1.31283e-51	Down
Itga2b	-2.14503	3.71042e-18	2.05346e-17	Down
Gcdh	-2.15165	3.81123e-56	1.17269e-54	Down
Comt	-2.15318	9.80545e-31	1.00974e-29	Down
Pygl	-2.15624	5.37409e-35	6.83497e-34	Down
Serpinf1	-2.15678	3.05912e-49	7.03741e-48	Down
Acsm3	-2.15988	6.34217e-21	4.05595e-20	Down
Csmd1	-2.16026	1.15711e-06	2.83426e-06	Down
Stard5	-2.16043	7.00909e-61	2.61762e-59	Down
Klrg1	-2.16169	2.30134e-15	1.06923e-14	Down
Ncam2	-2.16516	1.42018e-05	3.13348e-05	Down
Ces2h	-2.16557	3.47084e-26	2.87642e-25	Down
Podn	-2.16899	1.17897e-62	4.70212e-61	Down
Lypla1	-2.17239	7.42713e-59	2.54691e-57	Down
Agxt2	-2.17641	1.49985e-29	1.46268e-28	Down
Bche	-2.17678	1.51902e-22	1.05562e-21	Down
Slc26a1	-2.17807	1.08889e-53	3.06161e-52	Down
Gchfr	-2.17825	7.28029e-45	1.4247e-43	Down
Nudt7	-2.18022	3.74429e-32	4.1134e-31	Down
Qdpr	-2.18119	2.28997e-47	4.87806e-46	Down
Apom	-2.18284	1.41448e-31	1.51757e-30	Down
Aldh3a2	-2.18377	4.19208e-55	1.24297e-53	Down
Chchd10	-2.1858	1.98849e-50	4.80017e-49	Down
Slc16a1	-2.1893	1.70945e-53	4.74282e-52	Down
F13b	-2.18963	6.98706e-48	1.517e-46	Down
Pdk4	-2.19093	1.81032e-14	7.94084e-14	Down
Cyp4f4	-2.20088	1.25985e-46	2.62654e-45	Down
Cxcl11	-2.20169	1.41315e-20	8.89397e-20	Down
Exph5	-2.2058	3.99697e-11	1.41597e-10	Down
Dbi	-2.21032	5.44676e-53	1.46683e-51	Down
Cyp3a9	-2.21502	4.26884e-07	1.09001e-06	Down
Adi1	-2.21614	2.7218e-43	4.93793e-42	Down
Sdr9c7	-2.2199	5.92729e-60	2.13223e-58	Down
Azgp1	-2.22922	6.86711e-47	1.4419e-45	Down
Chka	-2.22979	6.18404e-33	7.05778e-32	Down
Naa80	-2.23081	3.17751e-25	2.51003e-24	Down
Gamt	-2.23219	1.89125e-31	2.00998e-30	Down
Rxrg	-2.23259	7.94442e-38	1.16484e-36	Down
Tert	-2.23438	1.35901e-46	2.82524e-45	Down
Entpd8	-2.23871	2.20382e-18	1.23315e-17	Down
Acaa2	-2.24065	2.46653e-44	4.70147e-43	Down
Plxna2	-2.24195	1.15728e-42	2.05883e-41	Down
Plin2	-2.24286	2.69474e-19	1.58583e-18	Down
Egfr	-2.25135	5.29424e-51	1.32149e-49	Down
Pcyt2	-2.25145	1.50352e-57	4.87134e-56	Down
Acsm1	-2.25437	7.70642e-45	1.50408e-43	Down
Cfhr1	-2.25445	1.5022e-63	6.1074e-62	Down
Rgn	-2.25558	1.41271e-13	5.86712e-13	Down
Vipr1	-2.25751	2.22388e-14	9.70556e-14	Down
Aldh2	-2.25886	1.27261e-45	2.57628e-44	Down
Grhpr	-2.25997	8.33321e-50	1.9569e-48	Down
Hyi	-2.2635	2.39564e-48	5.25573e-47	Down
Ldha	-2.26357	1.32489e-19	7.89179e-19	Down
Cebpa	-2.26449	5.62035e-41	9.33143e-40	Down
Gpam	-2.2679	1.83594e-35	2.39096e-34	Down
Ppa1	-2.268	1.62505e-51	4.14798e-50	Down
Afp	-2.26874	1.80563e-28	1.67517e-27	Down
Acp3	-2.26876	3.1902e-14	1.37916e-13	Down
Akr1c14	-2.2711	2.27212e-48	4.99221e-47	Down
Slc2a5	-2.27292	3.36807e-28	3.07995e-27	Down
Slc39a8	-2.27918	5.35317e-55	1.58404e-53	Down
A1cf	-2.27929	1.3246e-60	4.8241e-59	Down
Dab1	-2.28204	1.31811e-21	8.74196e-21	Down
Cdo1	-2.2824	6.08663e-35	7.69452e-34	Down
Cyp8b1	-2.28333	2.64437e-05	5.68166e-05	Down
Gcnt4	-2.28634	3.00318e-37	4.29188e-36	Down
Apmap	-2.28663	1.58144e-59	5.56614e-58	Down
Nat8	-2.28665	7.04211e-09	2.09188e-08	Down
Tsku	-2.28794	4.87013e-12	1.83609e-11	Down
Cyp1a2	-2.28993	7.30494e-12	2.72049e-11	Down
Gbe1	-2.29177	6.4643e-67	2.91032e-65	Down
Ivd	-2.29316	2.73961e-51	6.90882e-50	Down
Slc27a2	-2.29494	3.69593e-33	4.26121e-32	Down
Apoh	-2.29987	1.00765e-57	3.28649e-56	Down
Shmt2	-2.30033	1.04336e-59	3.69889e-58	Down
Bhmt2	-2.30114	7.54979e-41	1.24925e-39	Down
Mgll	-2.30219	6.14036e-56	1.86588e-54	Down
C8b	-2.31585	2.19658e-54	6.33382e-53	Down
Unc5d	-2.31596	3.237e-11	1.15342e-10	Down
Pgrmc1	-2.31695	1.62221e-42	2.86857e-41	Down
Notum	-2.32597	1.15399e-09	3.64238e-09	Down
Bmp2	-2.33472	4.07196e-13	1.64821e-12	Down
Crp	-2.33775	8.91258e-43	1.5933e-41	Down
Nsdhl	-2.33828	5.26536e-34	6.32403e-33	Down
Cbs	-2.3414	4.43107e-45	8.77663e-44	Down
Ar	-2.34292	1.7319e-08	4.96563e-08	Down
Cldn14	-2.34382	2.38141e-23	1.72432e-22	Down
Fcgr2b	-2.34596	3.84616e-28	3.5084e-27	Down
Acly	-2.35217	1.00417e-30	1.03281e-29	Down
Asrgl1	-2.35299	1.64299e-25	1.3206e-24	Down
Mecr	-2.36	2.16632e-33	2.52542e-32	Down
Rbp4	-2.3611	4.83589e-59	1.66611e-57	Down
Spp2	-2.36516	4.50859e-35	5.76918e-34	Down
Nr1h4	-2.36525	1.38165e-43	2.53165e-42	Down
Amdhd1	-2.36706	8.2677e-10	2.63564e-09	Down
Bmp10	-2.37021	1.14679e-11	4.22159e-11	Down
Afmid	-2.37166	7.2048e-47	1.51064e-45	Down
Bphl	-2.37608	1.14442e-53	3.21159e-52	Down
Phf19	-2.37643	1.57277e-09	4.90723e-09	Down
Aldh8a1	-2.38288	1.42878e-42	2.53569e-41	Down
Aadat	-2.38317	1.18995e-30	1.21961e-29	Down
Kyat3	-2.38382	5.64117e-56	1.71775e-54	Down
Vsig4	-2.38594	6.32224e-06	1.44086e-05	Down
Prodh1	-2.38861	2.07183e-28	1.91608e-27	Down
Bco2	-2.39123	3.30742e-30	3.33171e-29	Down
Acvr1c	-2.39324	9.65387e-35	1.20793e-33	Down
Tex12	-2.39338	7.14965e-14	3.02582e-13	Down
Gclc	-2.39778	2.94054e-59	1.02514e-57	Down
Slc17a2	-2.39988	2.15909e-34	2.64958e-33	Down
Mid1ip1	-2.40001	1.17213e-56	3.66808e-55	Down
Egf	-2.40002	1.38515e-22	9.64417e-22	Down
Igf1	-2.40118	7.0269e-53	1.87516e-51	Down
Hrg	-2.40683	2.25762e-21	1.48057e-20	Down
Slc45a3	-2.40771	4.02286e-44	7.56968e-43	Down
Paqr7	-2.40814	6.82733e-47	1.4356e-45	Down
Pxmp2	-2.41671	3.44818e-67	1.57171e-65	Down
Hadh	-2.42029	7.89096e-55	2.31169e-53	Down
Hjv	-2.42216	7.8224e-74	4.36537e-72	Down
Ptprd	-2.42241	4.32931e-62	1.68544e-60	Down
Pnkd	-2.42797	2.5703e-66	1.12947e-64	Down
Baat	-2.43121	7.53978e-26	6.16498e-25	Down
Slc17a3	-2.432	7.33674e-11	2.54445e-10	Down
Sult1c2a	-2.43833	2.98997e-59	1.0399e-57	Down
Ethe1	-2.43984	5.87055e-49	1.32557e-47	Down
Gpt	-2.44346	2.29466e-23	1.66397e-22	Down
Glyat	-2.44942	1.4438e-13	5.98776e-13	Down
Hsd17b6	-2.45278	3.26293e-30	3.28915e-29	Down
Hes6	-2.45748	5.87499e-28	5.30956e-27	Down
Pigr	-2.45774	2.35395e-45	4.71981e-44	Down
Ftcd	-2.46793	2.53787e-48	5.55117e-47	Down
Aqp8	-2.46841	1.00765e-28	9.48638e-28	Down
Abcc2	-2.47671	2.81159e-32	3.1191e-31	Down
Ugt2b35	-2.47883	1.73785e-30	1.76882e-29	Down
Ecm1	-2.48033	5.30409e-81	3.79747e-79	Down
Aspg	-2.48156	2.93135e-42	5.12184e-41	Down
Hnf4g	-2.48237	3.67605e-26	3.04306e-25	Down
Fahd1	-2.48432	1.36087e-73	7.53717e-72	Down
Aadac	-2.48634	1.64218e-26	1.38439e-25	Down
A1bg	-2.49064	6.66482e-06	1.51658e-05	Down
Slc41a2	-2.49129	4.58927e-74	2.60064e-72	Down
Aox1	-2.49293	1.11971e-06	2.74357e-06	Down
Kmo	-2.50078	4.83807e-27	4.17696e-26	Down
Lcat	-2.51111	7.89809e-63	3.15859e-61	Down
Nox4	-2.51149	3.55964e-25	2.80434e-24	Down
Pecr	-2.51321	4.07057e-84	3.28263e-82	Down
Ghr	-2.51327	1.59594e-48	3.52766e-47	Down
Slc25a13	-2.51904	1.28337e-69	6.21652e-68	Down
Mgst1	-2.52251	4.04727e-73	2.16006e-71	Down
Chchd6	-2.53396	2.43663e-12	9.41364e-12	Down
Bhmt	-2.53533	1.5346e-41	2.61594e-40	Down
Iyd	-2.53851	3.1582e-52	8.21946e-51	Down
Slc30a10	-2.53987	5.16435e-68	2.40626e-66	Down
Agxt	-2.55291	1.26492e-95	1.49719e-93	Down
Slco2a1	-2.55304	1.00006e-15	4.74397e-15	Down
Mug1	-2.55569	1.34047e-36	1.85255e-35	Down
Rnf125	-2.55889	7.11582e-32	7.73048e-31	Down
Cxcl12	-2.56934	3.662e-31	3.85838e-30	Down
Avpr1a	-2.58651	1.648e-31	1.75655e-30	Down
Acox2	-2.58997	1.30791e-28	1.22269e-27	Down
Sigmar1	-2.59062	2.964e-40	4.81223e-39	Down
Clec1b	-2.59095	7.38546e-12	2.74908e-11	Down
Upb1	-2.59722	2.27403e-32	2.5439e-31	Down
Ryr2	-2.59956	0.000100338	0.000203126	Down
Gstm6	-2.60094	8.14932e-55	2.37788e-53	Down
Hykk	-2.60306	1.07388e-34	1.3414e-33	Down
Lonp2	-2.60931	2.47471e-69	1.19086e-67	Down
Vtn	-2.61807	1.15554e-85	9.9764e-84	Down
Slc22a7	-2.62238	5.94534e-78	3.81047e-76	Down
Apoa2	-2.62333	1.42864e-26	1.20699e-25	Down
S1pr1	-2.62654	2.23145e-81	1.64578e-79	Down
Pparg	-2.62861	1.21793e-15	5.75515e-15	Down
Lipc	-2.63554	1.40187e-44	2.69309e-43	Down
Phf11	-2.63563	8.62251e-15	3.85126e-14	Down
Itga7	-2.63804	6.54224e-18	3.55895e-17	Down
Vwce	-2.64866	5.27745e-35	6.72371e-34	Down
Rab40b	-2.65244	1.01644e-19	6.09408e-19	Down
Fads2	-2.6627	3.22508e-13	1.31157e-12	Down
Dhtkd1	-2.6707	2.0918e-41	3.5452e-40	Down
Tdo2	-2.67232	1.01905e-40	1.68052e-39	Down
Gstz1	-2.67715	1.67793e-58	5.63547e-57	Down
Sytl5	-2.67971	0.000503414	0.000944593	Down
Angptl3	-2.69495	3.45343e-26	2.86362e-25	Down
Ces4a	-2.69567	2.98477e-44	5.65989e-43	Down
Otub2	-2.70272	2.25475e-51	5.71555e-50	Down
Hsd11b1	-2.70439	9.07878e-33	1.02895e-31	Down
Kcnn2	-2.71156	1.67905e-22	1.16407e-21	Down
Acat1	-2.7132	5.22199e-95	5.85062e-93	Down
C8g	-2.71544	1.31041e-77	8.32595e-76	Down
Hagh	-2.71635	1.31731e-67	6.07994e-66	Down
Apcs	-2.72111	9.21958e-54	2.60724e-52	Down
Cxcl9	-2.72607	3.05758e-16	1.50188e-15	Down
Tst	-2.73429	1.11709e-58	3.8129e-57	Down
St8sia1	-2.73462	1.19464e-12	4.70072e-12	Down
Khk	-2.75045	2.65692e-63	1.07426e-61	Down
Cyp39a1	-2.75757	3.15853e-52	8.21946e-51	Down
Gcat	-2.75775	8.11368e-70	3.96948e-68	Down
Ehhadh	-2.76173	1.09371e-34	1.36384e-33	Down
Hyal1	-2.7632	2.04293e-35	2.6558e-34	Down
Cmbl	-2.76756	8.16054e-71	4.06007e-69	Down
Atf5	-2.76893	1.82176e-42	3.20984e-41	Down
Adhfe1	-2.7698	6.7905e-60	2.43083e-58	Down
Arhgef37	-2.77103	1.88532e-11	6.82724e-11	Down
Gc	-2.77125	3.53565e-95	4.02269e-93	Down
Olr35	-2.77348	6.56039e-16	3.14663e-15	Down
Gjb1	-2.77352	9.05351e-64	3.72208e-62	Down
Acadm	-2.79097	2.40293e-81	1.76339e-79	Down
Dgat2	-2.79136	1.09381e-83	8.72495e-82	Down
Rtn4rl2	-2.79454	1.86001e-14	8.15636e-14	Down
Car7	-2.80865	1.64572e-14	7.23398e-14	Down
Inhba	-2.81457	1.88261e-19	1.11596e-18	Down
Cbln3	-2.81621	1.0019e-20	6.36023e-20	Down
Adh7	-2.82588	2.16432e-22	1.49486e-21	Down
Hsd11b2	-2.84116	4.56648e-17	2.35001e-16	Down
Fads1	-2.84677	1.97836e-18	1.11038e-17	Down
Etnppl	-2.85925	2.00123e-09	6.1849e-09	Down
Apoc3	-2.86297	6.56275e-95	7.29708e-93	Down
Coq8a	-2.86492	7.07464e-40	1.13604e-38	Down
Slc23a1	-2.86735	2.87848e-64	1.19681e-62	Down
Bbox1	-2.87517	2.86413e-69	1.37376e-67	Down
Ptgfr	-2.8766	2.52068e-40	4.10611e-39	Down
Retsat	-2.8886	1.74521e-42	3.07866e-41	Down
Pm20d1	-2.893	1.11421e-50	2.73009e-49	Down
Gpx1	-2.89405	2.77234e-56	8.56623e-55	Down
Sult1c3	-2.8999	1.0043e-33	1.19256e-32	Down
Nlrp12	-2.90391	3.93864e-84	3.19378e-82	Down
Aldob	-2.90482	1.20204e-79	8.20574e-78	Down
Adra1b	-2.90536	1.16085e-55	3.50573e-54	Down
Ttpa	-2.90581	2.77901e-62	1.09057e-60	Down
Prodh2	-2.90589	2.48302e-47	5.28163e-46	Down
Gk	-2.91962	4.17971e-40	6.75612e-39	Down
Hmgcs2	-2.92051	1.18234e-30	1.21266e-29	Down
Gzma	-2.92452	1.00265e-10	3.43509e-10	Down
Fabp7	-2.93765	2.66259e-26	2.22292e-25	Down
Ddhd1	-2.96488	3.70453e-74	2.10742e-72	Down
Maob	-2.98332	1.18835e-49	2.77729e-48	Down
Abat	-2.98332	3.57843e-97	4.37671e-95	Down
Akap5	-2.99473	2.5665e-33	2.98483e-32	Down
Agmo	-3.00574	2.53313e-59	8.87322e-58	Down
Tkfc	-3.0059	3.47998e-89	3.4279e-87	Down
Abca6	-3.02263	1.21319e-62	4.82546e-61	Down
Bdh1	-3.04246	3.14165e-74	1.79416e-72	Down
Ttr	-3.05661	1.68866e-42	2.98249e-41	Down
Cyp2c7	-3.06076	2.46661e-21	1.6133e-20	Down
Kynu	-3.08122	3.0533e-39	4.74718e-38	Down
Igfals	-3.09008	9.72431e-30	9.60456e-29	Down
Rdh7	-3.09188	1.06976e-106	1.76414e-104	Down
Hsd17b14	-3.09198	5.29149e-29	5.05291e-28	Down
Apoc1	-3.09974	1.28095e-35	1.69373e-34	Down
Oit3	-3.10597	2.35964e-16	1.16843e-15	Down
Crot	-3.11914	3.29225e-40	5.32749e-39	Down
Cyp4f1	-3.11977	2.03613e-42	3.58325e-41	Down
Clec4g	-3.13998	8.40274e-26	6.8401e-25	Down
Igf2bp3	-3.14408	5.70413e-69	2.70937e-67	Down
Cth	-3.1531	1.88327e-20	1.17972e-19	Down
Slc19a2	-3.17731	5.49735e-105	8.58347e-103	Down
Lin7a	-3.18112	1.31654e-41	2.25208e-40	Down
Urad	-3.18292	3.0156e-116	6.70606e-114	Down
Ptger3	-3.19	1.73149e-36	2.38174e-35	Down
Ndrg2	-3.19183	2.08101e-89	2.09199e-87	Down
Clec4f	-3.20316	1.37736e-05	3.04358e-05	Down
Dpt	-3.21521	6.22801e-64	2.56765e-62	Down
Angptl8	-3.21657	1.10577e-30	1.13493e-29	Down
Otc	-3.22439	1.83577e-38	2.76628e-37	Down
Atp2b2	-3.22515	4.56534e-41	7.60562e-40	Down
Cat	-3.23226	1.76567e-44	3.37872e-43	Down
Cyp2f4	-3.23431	1.42885e-66	6.31662e-65	Down
Mtmr7	-3.23629	1.08589e-78	7.11498e-77	Down
Uroc1	-3.24639	3.62477e-71	1.84725e-69	Down
Gpd1	-3.28161	3.72809e-86	3.25697e-84	Down
Mug2	-3.28349	1.19228e-50	2.91166e-49	Down
Pon1	-3.28423	1.19675e-55	3.60672e-54	Down
Il4i1	-3.28593	7.87255e-23	5.54706e-22	Down
Elovl5	-3.28599	3.10704e-80	2.17153e-78	Down
Gckr	-3.29527	1.68136e-73	9.22797e-72	Down
Ces1e	-3.29529	1.40792e-29	1.37668e-28	Down
Hao1	-3.29689	1.04564e-51	2.68302e-50	Down
Thrsp	-3.30618	7.46493e-24	5.56438e-23	Down
Marco	-3.31792	3.2409e-07	8.34651e-07	Down
Insig2	-3.33306	2.67744e-82	2.0361e-80	Down
Gdf2	-3.33432	5.69924e-10	1.84084e-09	Down
Slc46a1	-3.33793	9.98671e-100	1.36986e-97	Down
Esr1	-3.34589	2.48411e-52	6.49897e-51	Down
Gck	-3.37379	3.07005e-10	1.01279e-09	Down
Slc6a13	-3.37516	7.99603e-66	3.43151e-64	Down
Gfap	-3.40932	3.03607e-16	1.49181e-15	Down
Alb	-3.44729	3.43363e-115	6.99935e-113	Down
Il1a	-3.45438	2.80413e-21	1.82592e-20	Down
Aldh1l2	-3.46149	1.53401e-93	1.69283e-91	Down
Ptk6	-3.46738	3.05233e-31	3.22064e-30	Down
Ush2a	-3.49713	1.50543e-09	4.70412e-09	Down
Cldn1	-3.51256	4.60674e-57	1.46985e-55	Down
Dpys	-3.5132	3.64835e-47	7.72681e-46	Down
Slc10a1	-3.51434	1.28228e-44	2.48286e-43	Down
Cyp3a18	-3.51447	2.4137e-57	7.75182e-56	Down
AKR1C3l1	-3.5192	1.74643e-22	1.20851e-21	Down
Enpep	-3.52094	2.43705e-81	1.77953e-79	Down
Srebf1	-3.52986	7.37822e-42	1.27101e-40	Down
Atp13a5	-3.5387	4.04462e-16	1.96047e-15	Down
Dars2	-3.54114	1.64246e-05	3.6012e-05	Down
Slc17a1	-3.54375	7.17962e-73	3.79048e-71	Down
Dao	-3.55797	7.96077e-33	9.07145e-32	Down
Cers3	-3.58281	4.27443e-12	1.61899e-11	Down
Fn3k	-3.583	4.16095e-15	1.89836e-14	Down
Srd5a1	-3.58415	1.09791e-23	8.09749e-23	Down
Serpina6	-3.60378	6.90056e-23	4.88094e-22	Down
Hao2	-3.64557	2.85939e-40	4.65268e-39	Down
Rida	-3.64843	1.22289e-82	9.44649e-81	Down
Stab2	-3.68551	2.39877e-07	6.25343e-07	Down
Extl1	-3.7531	6.13509e-88	5.69903e-86	Down
Hsd17b13	-3.75432	4.88327e-71	2.45451e-69	Down
Tmem132e	-3.79113	4.79749e-33	5.51392e-32	Down
Olr59	-3.80179	4.87627e-39	7.52565e-38	Down
Gsta2	-3.85138	3.23554e-25	2.55449e-24	Down
Ddc	-3.88644	6.69808e-116	1.4044e-113	Down
Akr1c1	-3.91594	4.37842e-37	6.2089e-36	Down
Gstm7	-3.91729	7.38441e-114	1.44508e-111	Down
Tymp	-3.92207	2.8006e-30	2.83088e-29	Down
Inhbc	-3.95285	2.67945e-151	1.40451e-148	Down
Pnpla3	-3.95392	1.18579e-09	3.73795e-09	Down
Edar	-3.97619	1.6786e-36	2.31114e-35	Down
Acsl1	-3.98365	2.79411e-124	7.73759e-122	Down
Ltc4s	-4.00011	1.92206e-07	5.04833e-07	Down
Slc13a4	-4.01018	2.39087e-39	3.73314e-38	Down
Cabp2	-4.01114	2.74414e-56	8.497e-55	Down
Cyp3a2	-4.03652	6.0515e-53	1.62076e-51	Down
Ppp1r3c	-4.0657	3.42072e-41	5.73782e-40	Down
Serpina5	-4.07516	3.37785e-17	1.75307e-16	Down
Ugt2b17	-4.13363	7.18196e-34	8.58384e-33	Down
Unc80	-4.13858	1.29377e-29	1.27185e-28	Down
Ppp1r3b	-4.20454	1.36632e-66	6.05844e-65	Down
Dio1	-4.21057	8.31984e-45	1.6195e-43	Down
Pklr	-4.24134	3.30547e-95	3.79018e-93	Down
Or10j5	-4.25897	1.5371e-08	4.42526e-08	Down
Abcg5	-4.26397	4.94869e-15	2.24797e-14	Down
Cpb1	-4.27022	2.94012e-11	1.04917e-10	Down
Sgk2	-4.31341	1.7544e-25	1.40707e-24	Down
Apoc2	-4.40142	3.5553e-57	1.13685e-55	Down
G0s2	-4.46268	2.6623e-128	8.31375e-126	Down
Inhbe	-4.46743	2.98692e-41	5.02741e-40	Down
Angptl6	-4.49608	1.2295e-66	5.46828e-65	Down
Car1	-4.7096	2.70627e-15	1.25063e-14	Down
Serpina4	-4.7321	2.41243e-50	5.79496e-49	Down
Apoa4	-4.76155	1.56944e-95	1.84278e-93	Down
Clec4m	-4.7645	1.81587e-15	8.49316e-15	Down
Ap1g2	-4.91394	1.52387e-13	6.31088e-13	Down
Prtg	-4.97627	4.22762e-61	1.59509e-59	Down
Hal	-4.98427	6.81783e-99	9.01489e-97	Down
Gsta5	-4.98503	5.67716e-55	1.67317e-53	Down
Slc13a5	-5.09112	7.8416e-23	5.52791e-22	Down
LOC297568	-5.16364	6.15559e-66	2.65722e-64	Down
Hhip	-5.30995	8.02578e-56	2.43377e-54	Down
Abcg8	-5.36062	1.13574e-14	5.04059e-14	Down
Nrxn3	-5.48835	1.20616e-23	8.8603e-23	Down
Fabp1	-5.67124	1.69619e-191	1.65966e-188	Down
Akr1c3	-5.71185	7.9341e-37	1.11115e-35	Down
Inmt	-6.15927	1.32039e-44	2.54992e-43	Down
Sult1e1	-6.36367	4.61491e-46	9.42045e-45	Down
Slc22a8	-7.83749	2.92485e-27	2.5522e-26	Down
Cyp2c11	-10.9889	8.15286e-33	9.28312e-32	Down
Car3	-11.1395	5.73913e-81	4.08899e-79	Down
