# Supplementary material for: Integrative Transcriptomic Analysis Reveals Upregulated Apoptotic Signaling in Wound-Healing Pathway in Rat Liver Fibrosis Models
Source: Antioxidants (Basel). 2023 Aug 9;12(8):1588. doi: 10.3390/antiox12081588 (PMC10451232; doi:10.3390/antiox12081588)
Supplement: Supplementary file 1 [file antioxidants-12-01588-s001.zip › Supplementary table S3.xlsx]

## Sheet: Sheet1
Gene symbol	LogFC	P-value	Adjusted p-value	Expression
Plxdc2	4.11803	3.46022e-10	1.84264e-07	Up
Megf6	2.04649	0.000326301	0.00738782	Up
Scarf2	2.40911	4.54365e-05	0.00169915	Up
Cd24	2.12855	0.000123767	0.00356646	Up
Kifc1	3.25302	2.5042e-06	0.000184847	Up
Unc5b	2.33472	0.000109871	0.00330182	Up
Slc29a3	2.01643	3.97689e-05	0.00155262	Up
Lama4	2.08386	0.000329776	0.00745358	Up
Cdk1	2.50908	0.000217087	0.00545297	Up
Fhl1	2.39874	8.16623e-05	0.00263759	Up
Col6a1	2.48544	8.41685e-05	0.00268619	Up
Col6a2	2.80924	2.77039e-05	0.00113484	Up
Rasal1	4.59548	7.79945e-06	0.000453424	Up
Orai2	2.20899	0.000311439	0.00712403	Up
Eln	3.79525	4.75431e-09	1.22222e-06	Up
Cldn4	4.19905	1.62869e-09	5.60441e-07	Up
Ncf1	2.61015	1.97468e-05	0.000870492	Up
Boc	3.18606	6.23098e-05	0.00215462	Up
Maged2	2.02148	0.000224261	0.00558054	Up
Nid1	2.54532	5.83549e-06	0.000365007	Up
Lamc2	3.43035	1.3366e-09	5.08406e-07	Up
Nuf2	3.16211	0.000320428	0.00730455	Up
Cxcl6	5.5672	1.64179e-09	5.60441e-07	Up
Myh10	3.04234	2.98261e-07	3.71098e-05	Up
Abcc3	2.20739	5.49737e-05	0.00195934	Up
Prom1	2.36322	0.000106904	0.00324195	Up
Trpv2	3.40386	2.56861e-05	0.0010783	Up
Pmp22	2.69893	7.7775e-08	1.36239e-05	Up
Col3a1	3.23399	5.91013e-05	0.00207057	Up
Cenpf	3.46276	1.09376e-05	0.000580131	Up
Cldn6	4.3048	1.46258e-09	5.4087e-07	Up
Pkmyt1	2.46641	0.000406497	0.00857253	Up
Mcm6	2.41778	0.000290411	0.00675916	Up
Srpx2	4.07154	9.06475e-06	0.000498324	Up
Flrt2	2.37682	1.16895e-05	0.000617548	Up
Col5a2	2.87327	5.14575e-05	0.00186663	Up
Pttg1	3.43701	0.000259421	0.00625146	Up
Cxcr4	2.81582	1.59985e-05	0.000760884	Up
Rgs1	2.10715	9.74283e-05	0.00303052	Up
Col1a1	5.3319	2.16546e-07	2.79891e-05	Up
Ka11	2.3791	0.000110353	0.00330885	Up
Zfpm2	2.63516	4.33618e-05	0.00164466	Up
Itga3	2.15698	7.46611e-05	0.00246435	Up
Tspan8	2.93257	6.45839e-07	6.89113e-05	Up
Itgbl1	2.23219	0.000122253	0.0035614	Up
Clec3b	4.5355	4.26836e-06	0.00028845	Up
Dcn	2.96949	0.000230525	0.00570442	Up
Cthrc1	7.05531	1.06334e-06	9.50085e-05	Up
Begain	3.30713	4.84879e-05	0.00178814	Up
Fzd6	2.0852	5.26034e-05	0.00189786	Up
Glis2	2.39297	0.00011422	0.00338665	Up
Capn6	3.53946	1.01395e-07	1.60699e-05	Up
Egln3	3.03057	1.84699e-05	0.000822219	Up
Dync2li1	3.2521	8.42413e-05	0.00268619	Up
Lamb1	2.90146	1.27058e-07	1.87207e-05	Up
Mgp	3.58806	6.55106e-08	1.16286e-05	Up
Nsg1	3.20173	0.000409735	0.00861738	Up
Qpct	2.95623	4.0353e-05	0.00156624	Up
Hacd4	3.36244	4.96753e-06	0.000326391	Up
St14	3.24904	3.80543e-09	1.02877e-06	Up
Cd44	2.73971	3.86159e-07	4.67358e-05	Up
Erbb2	3.35774	1.7704e-05	0.000802623	Up
Sema3c	2.40478	8.4294e-05	0.00268619	Up
Mrc2	3.33728	1.61033e-06	0.000130721	Up
Thy1	3.8961	3.74342e-05	0.00147009	Up
Cdkn2b	3.15209	6.81479e-06	0.000404992	Up
Kif12	2.67445	2.96192e-06	0.000212	Up
Ttc9	3.50455	1.27806e-06	0.000108375	Up
C1qtnf6	3.33053	7.70166e-05	0.00251304	Up
Fbn1	2.06556	0.000123535	0.00356646	Up
Sstr3	2.77772	0.00010162	0.00313162	Up
Slit3	2.57497	0.000225165	0.00559258	Up
Ndrg1	2.47534	5.19875e-05	0.00188073	Up
Ehd4	2.107	0.000316573	0.00722905	Up
C1qtnf5	2.88735	1.89681e-06	0.000149422	Up
Cd63	2.58322	9.71261e-06	0.000523498	Up
Gria3	3.14959	1.85435e-07	2.46869e-05	Up
Bub1b	3.66091	4.3101e-05	0.00163944	Up
Tbxas1	3.09326	1.85282e-05	0.000822219	Up
Anxa13	2.53924	5.77588e-05	0.00203424	Up
Chst1	3.88133	6.39251e-05	0.00219339	Up
Ckap4	2.87908	9.89122e-06	0.000530975	Up
Krt7	4.41791	1.02796e-07	1.61002e-05	Up
Galnt12	2.48259	0.000480725	0.00980076	Up
Arhgap11a	2.63358	4.87924e-05	0.0017944	Up
Wnt5b	4.63301	5.37393e-07	6.01202e-05	Up
Htra3	4.22061	2.77205e-09	8.78673e-07	Up
Ptgis	3.49877	3.32201e-08	6.50382e-06	Up
Itgb6	3.08476	5.55276e-06	0.00035035	Up
Aoc1	4.38713	4.46912e-06	0.000298982	Up
Ica1	2.58623	8.84204e-06	0.000492527	Up
Loxl1	4.60593	8.34719e-11	6.94538e-08	Up
Gpnmb	6.23322	1.41026e-07	2.04074e-05	Up
Map3k6	2.70189	0.00015172	0.00420928	Up
Cdkn2c	3.03487	4.79522e-08	8.99138e-06	Up
Rtkn	2.08344	0.000331368	0.00746447	Up
Sulf1	3.13875	0.000208589	0.00527936	Up
Il17re	4.36664	2.37546e-07	3.04082e-05	Up
Aplnr	6.13815	8.20614e-10	3.52414e-07	Up
Schip1	3.06696	3.20834e-06	0.000225993	Up
Epsti1	2.00669	0.000440602	0.00906869	Up
Col9a3	4.28727	1.11915e-07	1.71256e-05	Up
Car2	2.76069	3.48682e-09	9.87659e-07	Up
Bmp4	2.84827	2.6138e-05	0.00108403	Up
Gpx7	3.36821	2.1237e-05	0.000925855	Up
Tgfb3	2.19777	0.000203104	0.00519985	Up
Lgals1	4.67885	4.53012e-07	5.2903e-05	Up
Adamts15	3.88345	5.35523e-07	6.01202e-05	Up
S100a11	2.95739	1.94979e-05	0.000862379	Up
Timp1	3.24543	1.27287e-06	0.000108375	Up
Anxa2	3.02926	1.71543e-05	0.000784794	Up
Vash1	2.24708	0.000102656	0.00314174	Up
Trim59	2.2122	0.0001759	0.00467416	Up
Thbs2	3.07385	1.54894e-05	0.00075535	Up
Tspo	2.72536	9.94816e-08	1.59566e-05	Up
Scube1	3.59939	6.47903e-05	0.00220838	Up
Sphk1	3.4975	2.59771e-05	0.00108403	Up
Lgals3	3.83274	5.11501e-05	0.00186565	Up
Gpr153	3.28632	5.04475e-06	0.00032922	Up
Fabp4	6.46662	1.19249e-09	4.6693e-07	Up
Slc25a4	3.11463	1.23035e-06	0.000107056	Up
Col8a2	2.68451	6.53886e-06	0.000395212	Up
Ckb	2.57882	0.000283138	0.00661302	Up
Ednrb	2.55253	0.000260371	0.0062569	Up
Col1a2	3.62883	3.10376e-05	0.00124616	Up
Pkm	3.20668	7.37587e-05	0.00244266	Up
Dkk2	2.6539	0.000168111	0.00451243	Up
Prag1	2.67632	0.000298161	0.00687942	Up
Aldoc	3.10221	0.000275514	0.00646575	Up
Col9a2	2.9663	0.000218662	0.00546271	Up
Tnfrsf21	3.5457	1.85851e-06	0.000148158	Up
Cygb	3.87257	3.40611e-09	9.85772e-07	Up
S100a8	2.58185	8.49825e-05	0.00269334	Up
Fst	5.29644	2.3767e-10	1.41827e-07	Up
S100a6	3.50666	6.56065e-06	0.000395212	Up
Plk4	2.98946	0.000111848	0.00334615	Up
Slc44a3	2.44762	0.000122647	0.00356507	Up
Fblim1	5.1552	1.08705e-10	8.51287e-08	Up
S100a4	3.55111	0.000203026	0.00519985	Up
Krt23	3.25263	0.000261116	0.0062635	Up
Ptn	3.00012	9.20462e-05	0.00289012	Up
B3galnt1	3.88835	8.92115e-06	0.00049432	Up
St6galnac2	2.7474	0.000105481	0.00321344	Up
Ltbp2	2.94254	3.18793e-09	9.61884e-07	Up
Pkia	2.29653	0.000477873	0.00975755	Up
Lpl	2.83679	1.01816e-05	0.000542192	Up
Thbs4	2.1906	0.00029762	0.00687884	Up
Mcm3	2.87562	1.24732e-05	0.000643626	Up
Arhgef10	2.02753	0.000351008	0.00778827	Up
Rhoc	2.45483	4.58328e-07	5.30584e-05	Up
Dpp7	2.68902	4.01095e-06	0.000273835	Up
Postn	12.6024	1.75955e-09	5.85623e-07	Up
Sparc	2.70195	0.000120151	0.00351555	Up
Alox5	2.9892	3.10768e-05	0.00124616	Up
Serinc2	4.48001	5.82694e-07	6.35853e-05	Up
Ldhb	2.19641	3.10715e-06	0.000221206	Up
Prc1	3.05964	4.82619e-05	0.00178814	Up
Tusc3	2.15992	0.000102216	0.00313547	Up
Entpd2	2.16474	1.58957e-06	0.000129828	Up
Eno2	3.1853	9.7027e-05	0.00302511	Up
Hmgb2	2.03384	3.21722e-05	0.00128621	Up
Kdelr3	2.78563	1.68538e-05	0.000774683	Up
Trem2	8.73813	4.14768e-10	2.12377e-07	Up
Capg	3.09111	0.000174648	0.00465017	Up
Aebp1	2.43998	0.000347528	0.00773686	Up
Rap1gap	2.7487	2.14936e-06	0.000164451	Up
Igsf10	2.98016	2.54884e-06	0.000185832	Up
Alpl	2.5936	9.09582e-06	0.000498324	Up
Blnk	4.04008	2.3577e-08	4.82893e-06	Up
Psat1	2.78409	1.44914e-05	0.000719864	Up
Lcn2	4.71167	5.87698e-05	0.00206439	Up
Map4k4	2.04466	5.08311e-06	0.00032944	Up
Matn4	4.37969	8.5574e-07	8.31566e-05	Up
Kif23	4.2445	8.16686e-05	0.00263759	Up
Kifc3	2.16539	3.94239e-07	4.68616e-05	Up
Fbln1	2.79029	4.37097e-06	0.000293893	Up
Smoc2	2.49514	2.55444e-06	0.000185832	Up
Dbn1	2.89769	3.82963e-06	0.000262803	Up
Pnoc	3.85445	7.34554e-05	0.00244266	Up
Mcm5	3.38871	1.22319e-05	0.000633634	Up
Anln	2.91484	0.000207761	0.00526842	Up
Edn1	2.73383	8.43408e-05	0.00268619	Up
Chac1	2.62292	0.000274715	0.00646163	Up
Anxa5	2.39254	6.57766e-07	6.94987e-05	Up
Il1rl1	2.80943	2.32581e-05	0.000992422	Up
Adgrg3	5.6606	6.44885e-10	2.96047e-07	Up
Pdpn	4.30211	1.94133e-06	0.00015114	Up
Adgrg1	2.62732	8.94847e-06	0.00049432	Up
Ccn2	2.10839	1.41393e-06	0.000118388	Up
Obsl1	2.9442	0.000202423	0.00519985	Up
Cpne7	2.30808	3.63581e-07	4.44069e-05	Up
Vil1	3.84824	1.63449e-05	0.000768673	Up
Ccna2	2.60193	1.26604e-06	0.000108375	Up
Bcat1	4.16465	0.000133659	0.00378597	Up
B4galt6	2.6824	2.51198e-06	0.000184847	Up
Tspan5	2.96144	7.17643e-05	0.00240654	Up
Esco2	3.79335	2.26798e-05	0.000973987	Up
Fkbp10	3.26904	2.24163e-05	0.000965789	Up
Slc1a5	2.51914	0.000220805	0.00550481	Up
Gprc5b	4.13737	0.000169588	0.00454269	Up
Aqp4	4.16308	1.48141e-05	0.000733161	Up
Myof	2.20113	0.000130518	0.0037128	Up
Dlgap1	3.64035	8.6768e-06	0.000485354	Up
Col4a1	3.10697	2.18622e-05	0.00094805	Up
Cx3cl1	2.62828	1.60026e-05	0.000760884	Up
Dkk3	2.82347	5.47762e-06	0.000348022	Up
Colec12	2.74183	4.50649e-06	0.000299975	Up
Fxyd6	2.60134	8.34828e-09	2.02074e-06	Up
Kctd1	3.41942	6.20721e-05	0.002152	Up
Itga8	3.7276	1.82689e-08	4.05356e-06	Up
Carmil1	2.48995	7.76354e-05	0.00252704	Up
Serpinb1a	3.21788	9.46884e-08	1.54858e-05	Up
Tmeff2	4.34412	1.53778e-07	2.17792e-05	Up
Ssc5d	4.44619	1.05377e-06	9.50085e-05	Up
Ston1	2.2726	0.000114901	0.00339495	Up
Mmp2	3.14291	9.27238e-07	8.71483e-05	Up
Tcf21	2.45961	9.27843e-07	8.71483e-05	Up
Serpinh1	2.58819	0.000356267	0.00786783	Up
Fhl2	3.46218	4.42052e-13	7.35629e-10	Up
Gmpr	3.3087	0.000237517	0.00583406	Up
Cldn7	2.7055	4.62724e-05	0.00172556	Up
Map1b	2.23769	0.000417892	0.00872006	Up
Mgat3	2.3719	0.000440731	0.00906869	Up
Anxa1	2.271	0.000185617	0.004874	Up
Mmp23	2.41546	0.000382949	0.00820965	Up
Dcdc2	2.96274	2.45025e-10	1.41827e-07	Up
Irag1	2.44635	1.20696e-05	0.000627668	Up
Sfrp1	3.53046	7.57172e-07	7.52256e-05	Up
Ucp2	2.38259	5.48169e-05	0.00195934	Up
Adam8	2.18788	0.0002957	0.00684636	Up
St3gal2	2.4767	7.05722e-05	0.00237855	Up
Vim	3.01858	0.000113884	0.00338425	Up
Bok	3.4231	8.23022e-08	1.40473e-05	Up
Ampd3	2.62814	0.000275862	0.00646575	Up
Vwa1	2.10267	0.000107338	0.0032477	Up
Tubb6	3.05518	2.4066e-07	3.05134e-05	Up
Ggt7	2.87056	0.000369638	0.00801464	Up
Pdgfrb	2.67758	5.71736e-07	6.29052e-05	Up
Cenph	3.47928	0.000148113	0.0041338	Up
Agtpbp1	2.15698	0.000113844	0.00338425	Up
Clec10a	3.11078	3.26559e-05	0.00130164	Up
Rpp25	2.78045	6.33546e-05	0.00217943	Up
Plk1	2.63374	0.000406627	0.00857253	Up
Htr7	4.28037	1.19905e-07	1.81397e-05	Up
Pik3ip1	2.47919	1.80866e-05	0.00081347	Up
Kif20b	2.71673	0.00048359	0.00984409	Up
Cblc	3.53261	2.85835e-07	3.58992e-05	Up
Plat	3.06253	1.92258e-06	0.000150561	Up
Kif2c	2.51281	0.000454699	0.00932728	Up
Mxra8	2.885	1.62292e-07	2.22742e-05	Up
Phgdh	2.84697	0.000140294	0.00395707	Up
Kcnn4	2.81752	0.000197746	0.00510194	Up
Msln	4.88175	6.6188e-14	1.4686e-10	Up
Cd9	2.93856	2.2262e-06	0.000168395	Up
Col6a3	3.35204	5.48972e-06	0.000348022	Up
Des	2.98611	7.47839e-05	0.00246435	Up
Slc7a6	2.33694	0.000377341	0.00813816	Up
Crlf1	9.47129	6.67457e-09	1.64553e-06	Up
Impdh1	2.73944	6.64586e-06	0.000398542	Up
Chpf	2.05484	1.85213e-05	0.000822219	Up
Slc4a3	3.84447	0.00010004	0.00309729	Up
Kif22	9.52032	7.24597e-12	8.7696e-09	Up
Rab3il1	2.59614	8.20946e-05	0.00263992	Up
Col5a3	4.13889	3.07452e-05	0.00124034	Up
Dmbt1	2.93808	0.000369124	0.00801464	Up
Cma1	3.68638	2.22402e-06	0.000168395	Up
Col7a1	5.1977	1.25766e-05	0.000646459	Up
Efemp2	2.78555	6.64377e-07	6.96445e-05	Up
Ntf4	4.8529	1.44241e-06	0.000120017	Up
Etv4	3.16185	0.00016569	0.00447385	Up
Ltbp3	2.72239	6.26006e-06	0.000382943	Up
Atp8b2	2.36457	5.45339e-06	0.000348022	Up
Numbl	3.96469	6.96943e-06	0.000410549	Up
Plekha4	2.39389	7.33055e-06	0.000429919	Up
Ctsk	2.61028	1.26778e-05	0.00064915	Up
Celsr1	3.08412	1.73926e-05	0.000792971	Up
Arhgef39	2.79401	0.000207508	0.00526842	Up
Rhoj	2.09687	0.000264842	0.00633006	Up
Fzd2	3.88273	6.06942e-08	1.10688e-05	Up
Col11a1	6.45478	3.0818e-10	1.7095e-07	Up
S100a10	2.55244	2.57568e-05	0.0010783	Up
Rab25	2.36353	0.000228707	0.00566998	Up
Col4a2	2.99617	6.82038e-06	0.000404992	Up
Kif1a	4.3382	7.40304e-07	7.46641e-05	Up
Mmrn1	2.56981	0.000263988	0.00632099	Up
Pcolce	3.09849	8.53023e-08	1.43751e-05	Up
Gpr183	2.88921	5.71999e-05	0.00202527	Up
Pla2g7	4.3053	9.29547e-07	8.71483e-05	Up
Grem1	3.68996	0.000422627	0.00879131	Up
Krt17	6.93505	8.78436e-07	8.41339e-05	Up
Cxcl16	2.20086	6.797e-07	7.04003e-05	Up
Vldlr	2.39017	0.000345411	0.0077026	Up
Adamtsl2	3.0807	2.04579e-07	2.69659e-05	Up
Iqgap3	3.93883	2.50219e-06	0.000184847	Up
Pf4	3.29341	4.06469e-05	0.0015685	Up
Mki67	2.57001	1.08947e-06	9.66938e-05	Up
Cdc20	2.2596	0.000124155	0.00356685	Up
Inf2	2.29153	3.57643e-07	4.40861e-05	Up
Prkar1b	4.44813	1.0469e-06	9.50085e-05	Up
Bex3	2.31839	4.68308e-05	0.0017415	Up
A2m	4.49062	1.24175e-10	9.18412e-08	Up
Ttk	3.2917	0.000164906	0.00446219	Up
Pdgfd	2.53261	1.65096e-05	0.000771201	Up
Clic1	2.2707	4.21541e-05	0.00161264	Up
Cilp	5.56453	1.2412e-08	2.89896e-06	Up
Plod2	3.84259	6.34406e-09	1.59356e-06	Up
Mmp12	5.87483	6.07273e-12	8.08463e-09	Up
Fndc1	4.94923	1.96154e-08	4.27099e-06	Up
Sytl2	2.56039	2.04481e-09	6.63964e-07	Up
Cdca8	2.67026	1.82517e-05	0.000818131	Up
Col16a1	3.15838	3.68523e-05	0.00145152	Up
Ace2	3.69857	4.29618e-05	0.00163883	Up
Ephb3	2.51534	0.000321967	0.00732708	Up
Ncam1	4.39221	5.31424e-07	6.01202e-05	Up
Gabrp	3.49244	0.000194358	0.00504383	Up
Adgrg2	6.41944	1.63939e-11	1.67886e-08	Up
Dclk1	3.3234	5.90404e-10	2.80716e-07	Up
Incenp	2.28704	0.000268108	0.00636249	Up
Edil3	3.26952	0.000116504	0.00343144	Up
Svep1	3.26164	2.35346e-06	0.000177015	Up
Sfn	2.37407	0.000235232	0.00578862	Up
Osmr	2.65191	2.42335e-08	4.88818e-06	Up
Cd276	3.02562	5.88423e-14	1.4686e-10	Up
Tnnt2	4.29225	4.49191e-05	0.00168929	Up
Ccl21	4.99557	7.91139e-08	1.36785e-05	Up
Slc16a3	2.86226	0.000233171	0.00575918	Up
Itgax	2.36542	0.000154171	0.00425626	Up
Gdpd5	2.61441	6.12323e-05	0.00212842	Up
Gjc2	3.59069	8.65986e-07	8.35426e-05	Up
Rab7b	3.24268	2.22338e-05	0.000961035	Up
Gpr34	3.42479	0.00010924	0.00329775	Up
Cyp1b1	4.53427	5.89162e-06	0.000366519	Up
Rab31	2.95624	3.62397e-06	0.000249979	Up
Rgs10	3.47312	1.43781e-07	2.05823e-05	Up
Cenpw	3.99985	2.08301e-05	0.000915216	Up
Rgcc	3.07073	2.78202e-05	0.00113611	Up
Spp1	5.98363	9.322e-06	0.000506546	Up
Mfap4	3.70449	1.79268e-07	2.4107e-05	Up
Thbs1	2.03978	3.24372e-06	0.000227283	Up
Scd2	2.76823	8.47736e-06	0.000476199	Up
Igsf7	5.0122	2.51313e-06	0.000184847	Up
Arhgef16	2.73309	8.47699e-05	0.00269334	Up
Abo	2.92715	0.000152459	0.00421973	Up
Bdkrb2	2.91653	0.000149712	0.00416971	Up
Card14	4.29243	5.41122e-08	1.00055e-05	Up
Vps37d	3.75457	1.66268e-05	0.000773074	Up
Bhlhe41	3.67953	0.00019003	0.00494115	Up
Racgap1	3.32134	2.35671e-05	0.00100108	Up
Ak1	2.69743	5.13832e-05	0.00186663	Up
Fabp5	3.49197	5.09093e-05	0.00186197	Up
Sctr	3.3182	1.38242e-10	9.20205e-08	Up
Sri	2.00203	6.1836e-06	0.000381122	Up
Cldn5	4.31185	4.97689e-06	0.000326391	Up
Pmepa1	2.93509	6.44648e-07	6.89113e-05	Up
Ebi3	3.71716	0.000268111	0.00636249	Up
Gpx3	3.36473	9.36598e-06	0.000506867	Up
Top2a	3.07684	5.75224e-05	0.00203129	Up
Lama5	2.61556	3.93113e-07	4.68616e-05	Up
Clec7a	3.01175	7.6981e-07	7.59146e-05	Up
Cacnb3	3.27986	1.62751e-06	0.000131315	Up
Rrm2	2.85656	0.000217562	0.00545463	Up
Clec12a	2.87458	0.000395206	0.008378	Up
Cftr	3.92498	1.33347e-10	9.20205e-08	Up
Sptbn4	3.26796	5.51905e-05	0.00195934	Up
Gpx2	4.04718	2.71239e-05	0.00111796	Up
Olr1	3.29757	1.58691e-07	2.20886e-05	Up
Fscn1	3.26072	6.4703e-07	6.89113e-05	Up
Ddr1	2.50691	5.83989e-06	0.000365007	Up
Pla1a	2.65065	9.53828e-08	1.54858e-05	Up
Oip5	3.21929	0.000158105	0.00432208	Up
Elmo1	2.28351	0.000361993	0.00796565	Up
Gpc3	2.78674	0.000419506	0.00874003	Up
Inhbb	5.57996	1.98904e-08	4.27099e-06	Up
Fam3c	2.38766	0.000185371	0.004874	Up
Kif15	3.4512	4.05496e-05	0.0015685	Up
Col15a1	4.58022	0.000136906	0.00386969	Up
Plxna3	2.79356	1.20624e-05	0.000627668	Up
Pxdn	2.56939	7.21944e-05	0.00241488	Up
Selenom	3.8018	3.60873e-06	0.000249979	Up
C7	3.23709	8.18241e-05	0.00263759	Up
Adamts2	2.42714	7.93068e-06	0.000459049	Up
Tmsb10	3.12593	1.48987e-06	0.000122436	Up
Sox4	3.58265	6.82163e-07	7.04003e-05	Up
Aldh18a1	2.85785	0.000392158	0.00832664	Up
Foxn3	-2.08479	9.69128e-05	0.00302511	Down
Ecm1	-2.10207	2.09814e-05	0.000918834	Down
Adh7	-2.24937	7.97533e-06	0.000459635	Down
Sult2a6	-2.30491	0.000336668	0.00755828	Down
Srd5a1	-2.3227	1.60582e-05	0.000760884	Down
Insig2	-2.35245	0.00014073	0.00396096	Down
Abcg5	-2.44884	0.00026771	0.00636249	Down
Fads2	-2.46283	0.00011501	0.00339495	Down
Angptl6	-2.52761	1.88522e-06	0.000149392	Down
Cish	-2.56857	0.000178103	0.00472329	Down
Nlrp12	-2.5945	5.49469e-07	6.0959e-05	Down
Cabp2	-2.63215	1.33828e-05	0.000677434	Down
Lpin1	-2.69924	6.80613e-05	0.0023056	Down
Fabp7	-2.82374	6.14749e-06	0.000380658	Down
Hamp	-3.01963	6.24717e-08	1.1239e-05	Down
Dab1	-3.1787	0.000109542	0.00329938	Down
Apoa4	-3.29663	6.96066e-07	7.07384e-05	Down
Nox4	-3.41542	9.86177e-07	9.18111e-05	Down
Clec4m	-3.42859	3.40957e-05	0.00135497	Down
Socs2	-3.49613	3.18244e-09	9.61884e-07	Down
Adh6	-3.51834	5.0698e-11	4.49962e-08	Down
Nudt11	-3.80012	1.40811e-06	0.000118388	Down
Abcg8	-4.14871	4.30243e-07	5.06888e-05	Down
Ush2a	-4.49295	1.1757e-05	0.000618658	Down
Ntsr1	-5.53039	1.04146e-06	9.50085e-05	Down
