# Supplementary material for: Integrative Transcriptomic Analysis Reveals Upregulated Apoptotic Signaling in Wound-Healing Pathway in Rat Liver Fibrosis Models
Source: Antioxidants (Basel). 2023 Aug 9;12(8):1588. doi: 10.3390/antiox12081588 (PMC10451232; doi:10.3390/antiox12081588)
Supplement: Supplementary file 1 [file antioxidants-12-01588-s001.zip › Supplementary table S4.xlsx]

## Sheet: Sheet1
Description	Gene Ratio	P-value	Adjusted p-value	Gene symbol	Up/down
WP_MIRNA_TARGETS_IN_ECM_AND_MEMBRANE_RECEPTORS	7/179	5.83755e-07	5.83755e-07	Col4a1/Col4a2/Thbs1/Col1a2/Col5a2/Col5a3/Col6a3	Up
WP_PROSTAGLANDIN_SYNTHESIS_AND_REGULATION	8/179	1.90807e-05	1.90807e-05	Edn1/Ednrb/Ptgis/Anxa1/Anxa2/Anxa5/S100a10/S100a6	Up
WP_BURN_WOUND_HEALING	11/179	3.28149e-05	3.28149e-05	Cxcr4/Mmp2/Timp1/Dcn/Col1a1/Col1a2/Fst/Eln/S100a11/S100a6/Vim	Up
WP_INFLAMMATORY_RESPONSE_PATHWAY	6/179	9.66998e-05	9.66998e-05	Lamb1/Thbs1/Col1a1/Col1a2/Lama5/Lamc2	Up
WP_FOCAL_ADHESION	14/179	0.000417237	0.000417237	Col4a1/Col4a2/Erbb2/Spp1/Lamb1/Thbs1/Itga3/Col1a1/Col1a2/Col5a2/Col5a3/Lama5/Lamc2/Thbs4	Up
WP_LUNG_FIBROSIS	7/179	0.000828875	0.000828875	Edn1/Spp1/Mmp2/Timp1/Ccn2/Eln/Grem1	Up
WP_VITAMIN_D_RECEPTOR_PATHWAY	12/179	0.00088971	0.00088971	Cdkn2b/Alox5/Spp1/Cd9/Sfrp1/Serpinb1a/S100a4/S100a6/S100a8/Ka11/Pnoc/Il1rl1	Up
WP_TYPE_I_COLLAGEN_SYNTHESIS_IN_THE_CONTEXT_OF_OSTEOGENESIS_IMPERFECTA	5/179	0.00124173	0.00124173	Col1a1/Col1a2/Plod2/Adamts2/Fkbp10	Up
WP_FOCAL_ADHESION_PI3KAKTMTORSIGNALING_PATHWAY	17/179	0.00170991	0.00170991	Col4a1/Col4a2/Itgax/Spp1/Lamb1/Thbs1/Itga3/Osmr/Col11a1/Col1a1/Col1a2/Col5a2/Col5a3/Lama5/Lamc2/Thbs4/Pik3ip1	Up
WP_APOPTOSISRELATED_NETWORK_DUE_TO_ALTERED_NOTCH3_IN_OVARIAN_CANCER	6/179	0.00207202	0.00207202	Thbs1/Tnfrsf21/Bex3/Anxa5/Vim/Card14	Up
WP_LIVER_X_RECEPTOR_PATHWAY	2/8	5.22234e-05	5.22234e-05	Abcg5/Abcg8	Down
WP_BILE_ACIDS_SYNTHESIS_AND_ENTEROHEPATIC_CIRCULATION	2/8	7.65058e-05	7.65058e-05	Abcg5/Abcg8	Down
WP_STATIN_INHIBITION_OF_CHOLESTEROL_PRODUCTION	2/8	0.000434138	0.000434138	Abcg5/Abcg8	Down
WP_VITAMIN_A_AND_CAROTENOID_METABOLISM	2/8	0.00102815	0.00102815	Abcg5/Abcg8	Down
WP_PPAR_SIGNALING_PATHWAY	2/8	0.00248272	0.00248272	Fads2/Fabp7	Down
WP_ANGIOPOIETINLIKE_PROTEIN_8_REGULATORY_PATHWAY	2/8	0.009078	0.009078	Abcg5/Abcg8	Down
WP_OMEGA9_FATTY_ACID_SYNTHESIS	1/8	0.0160536	0.0160536	Fads2	Down
WP_OMEGA3_OMEGA6_FATTY_ACID_SYNTHESIS	1/8	0.0171916	0.0171916	Fads2	Down
WP_FATTY_ACID_TRANSPORTERS	1/8	0.0205987	0.0205987	Fabp7	Down
WP_ANGIOTENSIN_II_RECEPTOR_TYPE_1_PATHWAY	1/8	0.0318812	0.0318812	Nox4	Down
