# Supplementary material for: Integrative Transcriptomic Analysis Reveals Upregulated Apoptotic Signaling in Wound-Healing Pathway in Rat Liver Fibrosis Models
Source: Antioxidants (Basel). 2023 Aug 9;12(8):1588. doi: 10.3390/antiox12081588 (PMC10451232; doi:10.3390/antiox12081588)
Supplement: Supplementary file 1 [file antioxidants-12-01588-s001.zip › Supplementary table S5.xlsx]

## Sheet: Sheet1
Gene symbol	LogFC	P-value	Adjusted p-value	Expression
Wnt2	9.24575	9.71979e-13	2.00766e-10	Up
Ush2a	7.41534	1.95811e-05	0.000542328	Up
RGD1564053	7.19436	7.55368e-05	0.00161706	Up
Prokr1	6.93329	0.000315208	0.00517503	Up
Rbp3	6.8346	0.000517265	0.00784364	Up
Stab2	5.94779	4.04473e-25	7.72796e-22	Up
Clca2	5.39921	4.01258e-19	3.40735e-16	Up
Vipr1	5.08472	1.76049e-15	7.47476e-13	Up
Clec4f	4.82174	3.20291e-17	1.95826e-14	Up
Sult1e1	4.58311	2.41539e-21	2.83995e-18	Up
Fras1	4.56471	2.29623e-05	0.000616834	Up
Cyp2c11	4.37318	3.80822e-20	3.63804e-17	Up
Esr1	4.36958	1.28766e-11	2.23658e-09	Up
Tppp	4.32495	0.000109596	0.00219839	Up
Gdf2	4.17836	6.98159e-16	3.23375e-13	Up
Esrrg	3.95033	1.50905e-10	1.9383e-08	Up
Fads1	3.93797	2.18338e-17	1.39054e-14	Up
Fads2	3.82909	1.23048e-16	5.87747e-14	Up
Car3	3.81417	1.02619e-16	5.0598e-14	Up
Fmo1	3.71037	5.6834e-15	1.97433e-12	Up
Il13ra2	3.70164	2.42388e-08	1.78981e-06	Up
Clcn5	3.59879	1.25995e-05	0.000385415	Up
Apba2	3.56621	9.49516e-08	5.64722e-06	Up
Smad9	3.5594	1.70381e-05	0.000491372	Up
Clec4g	3.53562	2.61727e-11	4.12422e-09	Up
Gck	3.5302	2.56883e-14	7.69895e-12	Up
Dars2	3.50933	9.24161e-10	9.35484e-08	Up
Tymp	3.44528	7.83972e-14	2.03102e-11	Up
Krt79	3.43648	8.02872e-12	1.49657e-09	Up
Rgn	3.41486	3.71813e-14	1.03198e-11	Up
A1cf	3.39389	1.48913e-13	3.50176e-11	Up
Reps2	3.32008	3.44015e-08	2.45713e-06	Up
Slc13a4	3.31846	1.67271e-12	3.40899e-10	Up
Fasn	3.26919	3.06281e-13	6.88456e-11	Up
Cd81	3.25126	1.11308e-11	1.97831e-09	Up
Epha3	3.19824	0.000214972	0.00374242	Up
Inhba	3.18422	7.88773e-08	4.88113e-06	Up
Brinp2	3.159	5.69854e-05	0.00129954	Up
Pnpla5	3.12258	2.54647e-08	1.87092e-06	Up
Akr1c1	3.11971	7.10069e-11	9.77785e-09	Up
LOC102555453	3.0371	9.59821e-11	1.26473e-08	Up
Ces1c	2.94528	2.57385e-11	4.09806e-09	Up
Pnpla3	2.93029	8.62342e-11	1.16645e-08	Up
Elovl6	2.91436	3.08688e-10	3.49503e-08	Up
Akr1d1	2.86458	7.42224e-11	1.01294e-08	Up
Marco	2.86264	3.53799e-08	2.50079e-06	Up
Pklr	2.85509	9.47451e-11	1.25929e-08	Up
Cd300lg	2.84593	0.000159961	0.00297807	Up
Cyp3a2	2.82789	1.20782e-10	1.5779e-08	Up
Cgnl1	2.82163	3.69734e-10	4.1251e-08	Up
Cyp1a2	2.79313	2.7038e-10	3.17076e-08	Up
Thrsp	2.76775	2.7175e-10	3.17076e-08	Up
Hnf4g	2.76455	2.74112e-05	0.000717431	Up
Nox4	2.75419	5.81712e-05	0.00131725	Up
Akap6	2.72084	0.000372105	0.00592461	Up
Ihh	2.7146	6.58347e-08	4.17814e-06	Up
Slc13a3	2.71	1.20609e-08	9.46677e-07	Up
Nat8	2.69983	1.76617e-09	1.7086e-07	Up
Cdon	2.69584	5.17057e-08	3.45118e-06	Up
Acly	2.68879	7.94168e-10	8.20193e-08	Up
Oit3	2.67904	8.06514e-09	6.69976e-07	Up
Slc24a5	2.66974	0.000178139	0.00324149	Up
Ptprd	2.64942	2.37203e-09	2.28028e-07	Up
Reg4	2.62747	5.67025e-07	2.65858e-05	Up
Col25a1	2.59504	0.000103342	0.00210051	Up
Atp11c	2.58739	4.01772e-09	3.6554e-07	Up
Il1a	2.58251	4.729e-07	2.26592e-05	Up
Slco1b2	2.58009	3.12838e-09	2.91569e-07	Up
Adgrv1	2.57256	1.87161e-07	1.00731e-05	Up
Hcn3	2.5692	1.28422e-07	7.21667e-06	Up
Hykk	2.56581	5.31065e-08	3.52927e-06	Up
Pld6	2.53718	4.20321e-06	0.000147353	Up
Akr1c3	2.53184	1.0946e-07	6.33618e-06	Up
Plaat1	2.51644	1.15688e-06	4.80513e-05	Up
Xpnpep3	2.49459	6.25093e-06	0.000207257	Up
Cbln3	2.46234	2.25709e-06	8.84606e-05	Up
Slc16a2	2.45166	1.87453e-08	1.42548e-06	Up
Ppfia2	2.43872	7.11165e-05	0.00154625	Up
Nrn1	2.4291	1.76869e-05	0.000503433	Up
AABR07006691.1	2.42439	3.55035e-08	2.50079e-06	Up
Abcg5	2.41531	1.29133e-07	7.23003e-06	Up
Mug1	2.41503	2.2585e-08	1.68396e-06	Up
Znrf3	2.40855	1.68638e-05	0.000488188	Up
Akap5	2.39468	1.01631e-06	4.32712e-05	Up
Avpr1a	2.39401	5.70719e-08	3.70633e-06	Up
Sntb1	2.37933	7.58785e-07	3.38135e-05	Up
Arhgef19	2.36754	9.02109e-08	5.47172e-06	Up
Cyp51	2.36474	4.45218e-08	3.02451e-06	Up
Csmd1	2.36411	5.80471e-07	2.68864e-05	Up
Hmgcs1	2.36157	4.49146e-08	3.0377e-06	Up
Camk1d	2.35361	6.9666e-07	3.1319e-05	Up
Ccdc28b	2.35306	0.000411667	0.00645367	Up
Msmo1	2.34304	6.04856e-08	3.88455e-06	Up
Wwox	2.33635	0.000273264	0.00457987	Up
Ehhadh	2.33052	7.01788e-08	4.43257e-06	Up
Vsig4	2.33014	1.60735e-05	0.000467969	Up
Acsm2	2.31796	1.55637e-07	8.55725e-06	Up
Aox1	2.31096	8.05992e-08	4.96757e-06	Up
Igfals	2.30351	9.13328e-08	5.49615e-06	Up
Ndst1	2.30342	1.64501e-07	8.94806e-06	Up
LOC297568	2.28185	1.09852e-07	6.33618e-06	Up
Pianp	2.27164	0.000138064	0.00264119	Up
Agmo	2.26908	1.43201e-07	7.95935e-06	Up
Psd3	2.26579	2.39063e-07	1.25569e-05	Up
Fhit	2.26491	0.000192772	0.00344622	Up
Nsdhl	2.26018	1.48767e-07	8.23698e-06	Up
Extl1	2.24586	4.48361e-07	2.15509e-05	Up
Slc2a5	2.2457	5.69808e-07	2.66346e-05	Up
Notum	2.24287	9.3319e-07	4.06376e-05	Up
Sdc3	2.24052	1.71528e-06	6.88137e-05	Up
Derl3	2.2182	5.99679e-06	0.000201011	Up
Nat8f1	2.21349	0.000281038	0.00468448	Up
Csad	2.20449	2.97317e-07	1.52765e-05	Up
Exph5	2.19965	3.81641e-05	0.000937843	Up
Entpd7	2.19942	1.39507e-05	0.000418111	Up
Erc1	2.19923	3.75064e-06	0.000133322	Up
Bdh1	2.19518	3.59549e-07	1.79598e-05	Up
Hsd17b2	2.18675	3.65474e-07	1.81963e-05	Up
Klhl42	2.17871	1.9884e-05	0.000546631	Up
Tln2	2.17576	4.15615e-06	0.000146375	Up
Inhbe	2.17152	6.73788e-07	3.047e-05	Up
Ces1e	2.171	4.02049e-07	1.98236e-05	Up
Sost	2.16907	6.50671e-05	0.00144906	Up
Ppp1r3b	2.1552	5.05118e-07	2.39032e-05	Up
Lrp2	2.15252	1.56833e-06	6.3418e-05	Up
Ptgfr	2.1468	3.01126e-06	0.000111958	Up
Colec10	2.14376	1.13676e-06	4.73443e-05	Up
Chml	2.14245	0.000156638	0.00292691	Up
Dock1	2.14041	2.48147e-06	9.50338e-05	Up
Pign	2.13858	2.48698e-06	9.50338e-05	Up
Mme	2.13309	2.77463e-05	0.000724961	Up
Xpnpep2	2.12997	8.11497e-07	3.58456e-05	Up
Cacna2d2	2.12511	0.000407477	0.00640111	Up
Edar	2.11696	7.6634e-06	0.000248167	Up
Hsd17b14	2.11094	1.75615e-05	0.000500799	Up
Pip4k2b	2.10593	6.5078e-06	0.000214379	Up
Acaca	2.10218	9.49261e-07	4.08717e-05	Up
Pcsk9	2.09891	1.07446e-06	4.53679e-05	Up
Bhlha15	2.09413	3.71248e-06	0.000132273	Up
Acss3	2.08455	1.33768e-06	5.51119e-05	Up
Diaph2	2.0799	4.46221e-05	0.00106904	Up
Ehd3	2.07093	1.56282e-06	6.33627e-05	Up
Col13a1	2.06758	0.000103578	0.00210252	Up
Cat	2.05837	1.38507e-06	5.66064e-05	Up
Ddc	2.05211	2.45009e-06	9.40945e-05	Up
Nfix	2.04599	1.47555e-05	0.000433727	Up
Cacna2d4	2.04596	5.21422e-05	0.00120757	Up
Acacb	2.03464	3.4908e-06	0.000126738	Up
Pik3c2g	2.03406	6.20035e-06	0.000206926	Up
Nfatc2	2.02211	0.000244393	0.00417379	Up
Fbxl17	2.01825	5.31659e-06	0.000181393	Up
Plxna2	2.01629	2.81398e-06	0.000106202	Up
Cbl	2.01113	0.000111481	0.00223327	Up
Baat	2.0092	2.38973e-06	9.29441e-05	Up
Dpys	2.00753	2.56204e-06	9.76578e-05	Up
B3galt1	2.00511	3.36209e-06	0.000122807	Up
Rprm	-2.00986	1.24328e-05	0.000381596	Down
Galnt12	-2.01211	0.000684293	0.00972064	Down
Bcat1	-2.01304	2.20292e-05	0.000598659	Down
Cd14	-2.01626	4.3226e-06	0.000151192	Down
Fuom	-2.0211	1.71074e-05	0.000492443	Down
Zfp36	-2.02175	2.16869e-06	8.52143e-05	Down
Rsad2	-2.02325	1.28326e-05	0.000389954	Down
Cryab	-2.02481	2.8781e-06	0.000107823	Down
Sphk1	-2.02546	6.21809e-05	0.00139976	Down
Postn	-2.02713	2.71107e-05	0.000712007	Down
Degs2	-2.02906	0.000145175	0.00274628	Down
Klf4	-2.03567	2.87705e-06	0.000107823	Down
Ccn1	-2.049	2.0948e-06	8.25232e-05	Down
Etv4	-2.07388	1.92677e-05	0.00054038	Down
Mapk13	-2.07416	4.43149e-05	0.00106335	Down
Nr4a3	-2.07747	0.000336548	0.00545508	Down
S100a8	-2.08094	3.085e-06	0.000114175	Down
Jund	-2.08569	1.09994e-06	4.59358e-05	Down
Angptl4	-2.08979	1.37473e-06	5.63344e-05	Down
Gpx2	-2.10104	3.65798e-06	0.000130942	Down
Clec2d2	-2.11235	1.08638e-05	0.000338244	Down
Lif	-2.11515	2.44206e-06	9.40945e-05	Down
Atp1a3	-2.11612	4.70477e-05	0.00111492	Down
Mfsd2a	-2.1209	8.39605e-07	3.67718e-05	Down
Ggt1	-2.12179	1.70589e-06	6.86173e-05	Down
Ackr3	-2.12898	1.09854e-06	4.59358e-05	Down
Irs2	-2.12922	8.16112e-07	3.58456e-05	Down
Osmr	-2.13181	8.45572e-07	3.69274e-05	Down
Ciart	-2.1346	4.17668e-06	0.00014676	Down
Timp1	-2.13562	9.35862e-07	4.06382e-05	Down
Orm1	-2.1377	5.72065e-07	2.66586e-05	Down
Colq	-2.14266	0.000339487	0.00547906	Down
Dmbt1	-2.1544	4.89092e-07	2.33618e-05	Down
Pou2f1	-2.16085	0.000113566	0.00226318	Down
Klf6	-2.16569	4.47084e-07	2.15509e-05	Down
Il18rap	-2.17472	3.17489e-05	0.000796728	Down
Psca	-2.17475	1.77955e-05	0.000505583	Down
Egr2	-2.17525	6.85447e-05	0.00150532	Down
Rab25	-2.18682	4.4175e-05	0.00106268	Down
Smox	-2.18868	5.80268e-07	2.68864e-05	Down
Uchl1	-2.19941	0.000339042	0.00547906	Down
Ppp2r3b	-2.20865	8.40839e-05	0.00177028	Down
Wnt4	-2.21	5.23464e-06	0.000180206	Down
F13a1	-2.21593	3.42077e-05	0.000848807	Down
S100a4	-2.22134	9.84356e-07	4.21453e-05	Down
Id1	-2.22293	3.321e-07	1.6753e-05	Down
Ndrg1	-2.22795	3.0499e-07	1.55912e-05	Down
Elf3	-2.235	3.59817e-06	0.000129372	Down
Col7a1	-2.23634	4.38998e-06	0.000153198	Down
Fstl3	-2.24001	3.54385e-06	0.00012836	Down
Cacna1h	-2.25373	0.00022797	0.00393286	Down
H4f3	-2.26535	4.32787e-07	2.10005e-05	Down
Ace	-2.27249	6.36716e-07	2.91815e-05	Down
Ctsl	-2.2748	1.20311e-07	6.83627e-06	Down
Kcnk4	-2.27907	5.36196e-06	0.000182128	Down
Pkp1	-2.28014	0.000187233	0.00337882	Down
Pim1	-2.28637	4.25346e-07	2.07713e-05	Down
Olr1	-2.28975	2.0561e-07	1.09123e-05	Down
Ttc9	-2.30198	1.76919e-06	7.06059e-05	Down
Isg15	-2.31598	1.81725e-07	9.81507e-06	Down
Rnd1	-2.32634	1.29616e-07	7.23056e-06	Down
P2rx5	-2.33235	2.12271e-05	0.000580421	Down
Crispld2	-2.34479	3.10236e-06	0.00011454	Down
Plin2	-2.34572	5.42769e-08	3.59144e-06	Down
Adamts15	-2.34695	8.14835e-07	3.58456e-05	Down
Trem1	-2.34776	1.84866e-05	0.000520663	Down
Pmaip1	-2.34857	2.41241e-06	9.33511e-05	Down
Cited2	-2.35	5.66136e-08	3.70633e-06	Down
Zfp36l2	-2.35089	5.56158e-08	3.66417e-06	Down
Eno2	-2.35617	2.78191e-07	1.45125e-05	Down
Trib3	-2.35948	9.54771e-08	5.65646e-06	Down
Fmo2	-2.36307	7.53763e-06	0.000244613	Down
Pla2g12a	-2.36566	5.72256e-08	3.70633e-06	Down
Cldn5	-2.37021	2.35595e-07	1.24175e-05	Down
Sat1	-2.37813	3.72805e-08	2.59015e-06	Down
Plet1	-2.37923	7.68701e-06	0.000248406	Down
Prom1	-2.38085	4.18618e-07	2.05742e-05	Down
Vcan	-2.38867	1.20836e-07	6.84068e-06	Down
Ccl3	-2.41732	5.35078e-06	0.000182128	Down
Cyp1b1	-2.41788	8.84736e-08	5.38772e-06	Down
S100a11	-2.43444	2.81415e-08	2.03859e-06	Down
Zcchc12	-2.43771	1.31723e-05	0.00039948	Down
Adra2a	-2.44944	0.0006696	0.00953853	Down
Cyp26b1	-2.45546	8.15606e-08	5.00664e-06	Down
Rab30	-2.46763	2.55821e-08	1.87092e-06	Down
Got1	-2.47936	1.0537e-08	8.52157e-07	Down
Clcf1	-2.48143	8.3209e-08	5.0874e-06	Down
Trim36	-2.48851	1.59686e-06	6.44011e-05	Down
Lpl	-2.49351	1.16033e-08	9.23051e-07	Down
Ackr1	-2.5004	0.000246499	0.00420037	Down
Aloxe3	-2.50726	1.74595e-05	0.000499753	Down
Plaur	-2.51043	3.52491e-08	2.50079e-06	Down
Hmox1	-2.51785	6.66174e-09	5.68853e-07	Down
Rgs1	-2.53361	2.00502e-07	1.07089e-05	Down
Anxa13	-2.53438	1.95009e-08	1.46833e-06	Down
A2m	-2.53739	5.38899e-09	4.68199e-07	Down
Cldn7	-2.55108	4.0062e-07	1.98171e-05	Down
Zap70	-2.55153	2.84933e-07	1.48136e-05	Down
Gadd45a	-2.55999	4.32452e-09	3.88825e-07	Down
Irx5	-2.59639	6.59924e-05	0.00145765	Down
Grem1	-2.64706	1.60233e-07	8.74703e-06	Down
Sarm1	-2.65935	7.06092e-09	5.9959e-07	Down
Pex11a	-2.65999	3.84077e-09	3.51534e-07	Down
Foxp3	-2.66388	1.22538e-07	6.91144e-06	Down
Fosl2	-2.66657	2.67128e-09	2.53606e-07	Down
Gpat3	-2.68371	7.79822e-09	6.51343e-07	Down
Ddit4	-2.69556	9.95352e-10	9.9007e-08	Down
Acp3	-2.69619	7.59417e-09	6.37785e-07	Down
Jun	-2.73859	4.19018e-10	4.57478e-08	Down
Sgca	-2.75717	7.38991e-09	6.2406e-07	Down
Tnfrsf12a	-2.77117	6.01196e-10	6.47132e-08	Down
Pvr	-2.78039	9.33719e-10	9.3894e-08	Down
Slc13a5	-2.78722	6.69562e-10	7.0581e-08	Down
Sstr3	-2.78882	8.24193e-10	8.45489e-08	Down
Rasal1	-2.78882	0.000159961	0.00297807	Down
Grhl1	-2.79758	6.58771e-08	4.17814e-06	Down
Cox4i2	-2.79966	1.74357e-06	6.97658e-05	Down
Maff	-2.80604	3.92938e-10	4.35222e-08	Down
Plcd4	-2.80778	9.96636e-07	4.25519e-05	Down
Egln3	-2.81893	2.5843e-10	3.07184e-08	Down
Gadd45g	-2.83325	2.3051e-10	2.84141e-08	Down
Mt1-ps3	-2.86872	1.76113e-10	2.20646e-08	Down
Slc16a3	-2.87626	4.1756e-10	4.57478e-08	Down
Ccl7	-2.88108	7.86746e-07	3.48563e-05	Down
Cxcl6	-2.89258	3.57705e-06	0.000129256	Down
Apold1	-2.90898	1.63455e-10	2.082e-08	Down
Fosb	-2.93373	2.44521e-06	9.40945e-05	Down
Sds	-2.96349	2.10566e-11	3.46075e-09	Down
Slc25a25	-2.96505	2.15481e-11	3.48687e-09	Down
Tnfaip6	-2.97325	5.15419e-07	2.43154e-05	Down
Socs3	-2.98444	3.59714e-11	5.61043e-09	Down
Stfa2l1	-3.0199	0.000102431	0.00208647	Down
Slc1a4	-3.02843	2.06703e-11	3.43418e-09	Down
Gdf15	-3.03401	1.25398e-11	2.20311e-09	Down
Foxq1	-3.04203	3.22118e-09	2.98398e-07	Down
Liph	-3.08322	3.96333e-08	2.74115e-06	Down
Duox2	-3.10121	1.03408e-06	4.37839e-05	Down
Cd109	-3.10715	6.02425e-09	5.19629e-07	Down
Inhbb	-3.11803	3.03188e-10	3.45838e-08	Down
Map3k6	-3.15867	5.34723e-11	7.7106e-09	Down
Mcemp1	-3.18289	8.65822e-09	7.07706e-07	Down
Gucy2c	-3.22727	9.14037e-12	1.66322e-09	Down
Pdk4	-3.2425	4.60073e-13	1.0011e-10	Down
Robo3	-3.25356	1.82365e-05	0.000516194	Down
Cldn4	-3.26232	6.83096e-12	1.30514e-09	Down
Ramp3	-3.27343	2.87917e-10	3.33394e-08	Down
Slc2a3	-3.27958	5.65616e-12	1.10839e-09	Down
Mt1	-3.32109	1.35836e-13	3.24415e-11	Down
Anxa8	-3.33635	4.26068e-11	6.32276e-09	Down
Aoc1	-3.34194	1.06404e-11	1.9134e-09	Down
Dio2	-3.34338	9.30196e-08	5.57571e-06	Down
Vwa1	-3.38519	2.81998e-13	6.43334e-11	Down
Slc2a1	-3.39893	1.2766e-13	3.09728e-11	Down
Adm	-3.41785	1.60108e-13	3.70795e-11	Down
Gpihbp1	-3.42058	3.14646e-05	0.00079217	Down
Npas2	-3.44677	2.63265e-07	1.37809e-05	Down
Btg2	-3.45947	1.95676e-14	5.98183e-12	Down
Mt2A	-3.46483	1.71181e-14	5.45103e-12	Down
Ttll8	-3.47697	0.000240916	0.00411902	Down
Ppp1r3g	-3.49818	4.93737e-08	3.32457e-06	Down
Slc25a29	-3.54348	3.47794e-14	1.00302e-11	Down
Trim72	-3.54757	3.8974e-07	1.93415e-05	Down
H1f5	-3.55213	9.24161e-10	9.35484e-08	Down
Ckmt1	-3.58048	9.34721e-06	0.00029519	Down
Serpine1	-3.58634	4.29882e-15	1.60262e-12	Down
Mmp9	-3.58774	5.4968e-13	1.16693e-10	Down
Spp1	-3.60391	5.31932e-15	1.91647e-12	Down
Unc79	-3.64605	8.1742e-05	0.00172811	Down
Fos	-3.6562	9.0976e-12	1.66322e-09	Down
Crlf1	-3.67555	3.96625e-11	6.06241e-09	Down
Cxcl3	-3.69828	5.75184e-05	0.00130829	Down
Ptprz1	-3.71365	6.35179e-10	6.74216e-08	Down
Pgf	-3.72442	2.92109e-06	0.000108899	Down
Fst	-3.7378	1.67881e-15	7.3316e-13	Down
Hcar2	-3.75299	1.13604e-13	2.80072e-11	Down
Hilpda	-3.75593	1.90432e-15	7.86689e-13	Down
Pglyrp1	-3.76268	1.78432e-14	5.566e-12	Down
Krt23	-3.76317	2.88451e-07	1.49457e-05	Down
Ddit4l	-3.79738	2.88486e-05	0.000746111	Down
Gprc5a	-3.883	1.31748e-08	1.02744e-06	Down
Arg2	-3.89012	1.47133e-05	0.00043332	Down
Npy	-3.97307	4.53576e-17	2.6665e-14	Down
Gdf3	-3.98274	0.000575412	0.00849776	Down
Atf3	-4.0581	7.68668e-18	5.28488e-15	Down
Lcn2	-4.06074	2.20237e-18	1.68316e-15	Down
Duoxa2	-4.07535	1.61499e-09	1.57895e-07	Down
Slc15a1	-4.13837	7.10818e-08	4.45281e-06	Down
Prkar1b	-4.17322	2.16718e-11	3.48687e-09	Down
Has1	-4.20369	0.000164371	0.00302699	Down
Nos2	-4.22477	4.65019e-13	1.0011e-10	Down
Igfbp1	-4.28017	7.28453e-20	6.54965e-17	Down
Mdga1	-4.31378	3.7316e-13	8.26631e-11	Down
Trh	-4.33419	7.35111e-05	0.00158927	Down
Epo	-4.37492	8.37742e-09	6.88435e-07	Down
Gjb5	-4.41195	2.01077e-07	1.07089e-05	Down
Vwa2	-4.47319	1.14875e-07	6.57627e-06	Down
Penk	-4.67077	3.73804e-14	1.03198e-11	Down
Il1r2	-4.76753	1.02046e-16	5.0598e-14	Down
Fgf23	-4.82164	5.86758e-11	8.30425e-09	Down
Defb1	-4.8656	6.25373e-17	3.5403e-14	Down
Gadd45b	-4.88924	4.03455e-23	6.16681e-20	Down
Ppp1r15a	-4.89476	3.89785e-23	6.16681e-20	Down
Il6	-5.19938	9.79951e-08	5.73891e-06	Down
Dio3	-5.53717	1.00175e-18	8.0588e-16	Down
Gprc5d	-5.8279	2.45076e-10	2.97301e-08	Down
Rbp7	-5.84745	8.75427e-28	2.23015e-24	Down
Atg9b	-6.00706	4.32237e-29	1.65168e-25	Down
Car12	-6.30622	6.59315e-31	3.35921e-27	Down
Cxcl2	-6.81612	6.10976e-23	8.48979e-20	Down
Doc2a	-6.8726	4.58827e-21	5.0094e-18	Down
Cox6a2	-6.90458	0.000315208	0.00517503	Down
Prok2	-7.03276	7.2053e-17	3.93332e-14	Down
H1f4	-7.11195	2.43514e-28	7.44422e-25	Down
Areg	-7.24308	4.77659e-05	0.00111979	Down
Cda	-7.24308	4.77659e-05	0.00111979	Down
Aire	-7.38656	1.95811e-05	0.000542328	Down
Ccl28	-7.38656	1.95811e-05	0.000542328	Down
Lman1l	-7.45328	1.26863e-05	0.000386276	Down
Nppc	-7.63672	3.60565e-06	0.000129372	Down
Tuba3b	-7.97638	3.47842e-07	1.7432e-05	Down
Ascl1	-8.16057	5.79163e-08	3.73524e-06	Down
