# Supplementary material for: Integrative Transcriptomic Analysis Reveals Upregulated Apoptotic Signaling in Wound-Healing Pathway in Rat Liver Fibrosis Models
Source: Antioxidants (Basel). 2023 Aug 9;12(8):1588. doi: 10.3390/antiox12081588 (PMC10451232; doi:10.3390/antiox12081588)
Supplement: Supplementary file 1 [file antioxidants-12-01588-s001.zip › Supplementary table S6.xlsx]

## Sheet: Sheet1
Description	Gene Ratio	P-value	Adjusted p-value	Gene_symbol	Up/down
WP_OREXIN_RECEPTOR_PATHWAY	15/148	5.39408e-07	5.39408e-07	Fos/Maff/Il6/Fosb/Lpl/Spp1/Fosl2/Egr2/Slc2a1/Cldn4/Gadd45b/Id1/Klf4/Dio2/Nr4a3	Up
WP_OVERVIEW_OF_PROINFLAMMATORY_AND_PROFIBROTIC_MEDIATORS	12/148	8.61916e-07	8.61916e-07	Il6/Epo/Ccl3/Spp1/Mmp9/Ccl28/Ccl7/Cxcl2/Cxcl3/Cxcl6/Lif/Areg	Up
WP_ADIPOGENESIS	13/148	2.65849e-06	2.65849e-06	Gadd45a/Il6/Serpine1/Socs3/Lpl/Egr2/Irs2/Gadd45b/Lif/Cyp26b1/Plin2/Trib3/Klf6	Up
WP_PHOTODYNAMIC_THERAPYINDUCED_HIF1_SURVIVAL_SIGNALING	7/148	1.05685e-05	1.05685e-05	Epo/Serpine1/Igfbp1/Nos2/Slc2a1/Slc2a3/Pmaip1	Up
WP_P53_TRANSCRIPTIONAL_GENE_NETWORK	8/148	4.04276e-05	4.04276e-05	Gadd45a/Btg2/Serpine1/Slc2a1/Sat1/Lif/Pmaip1/Rprm	Up
WP_IL18_SIGNALING_PATHWAY	17/148	4.25214e-05	4.25214e-05	Jun/Fos/Hmox1/Btg2/Il6/Ccl3/Socs3/Nos2/Spp1/Mmp9/Timp1/Cldn4/Cxcl2/Il18rap/Ptprz1/Atf3/Hcar2	Up
WP_PROSTAGLANDIN_SIGNALING	6/148	4.90692e-05	4.90692e-05	Il6/Ccl3/Mmp9/Cxcl2/Cxcl3/Areg	Up
WP_HAIR_FOLLICLE_DEVELOPMENT_CYTODIFFERENTIATION_PART_3_OF_3	9/148	6.19308e-05	6.19308e-05	Jun/Fos/Fosb/Egr2/Fst/S100a4/Foxq1/Prom1/Gprc5d	Up
WP_SPINAL_CORD_INJURY	10/148	0.000137684	0.000137684	Fos/Gadd45a/Btg2/Il6/Nos2/Mmp9/Vcan/Cxcl2/Cxcl3/Ptprz1	Up
WP_BURN_WOUND_HEALING	9/148	0.000193024	0.000193024	Il6/F13a1/Mmp9/Timp1/Cxcl2/Cxcl3/Fst/S100a11/Klf4	Up
WP_CHOLESTEROL_METABOLISM_WITH_BLOCH_AND_KANDUTSCHRUSSELL_PATHWAYS	7/74	5.29977e-07	5.29977e-07	Hmgcs1/Fads2/Fads1/Fasn/Cyp51/Msmo1/Nsdhl	Down
WP_IRINOTECAN_PATHWAY	4/74	3.73415e-06	3.73415e-06	Cyp3a2/Ces1c/Ces1e/Slco1b2	Down
WP_METAPATHWAY_BIOTRANSFORMATION_PHASE_I_AND_II	10/74	4.37805e-06	4.37805e-06	Cyp1a2/Baat/Cyp3a2/Akr1c3/Cyp2c11/Fmo1/Akr1c1/Cyp51/Sult1e1/Nat8	Down
WP_TRYPTOPHAN_METABOLISM	6/74	4.66709e-06	4.66709e-06	Cyp1a2/Cat/Cyp3a2/Cyp2c11/Aox1/Ddc	Down
WP_CHOLESTEROL_BIOSYNTHESIS_PATHWAY	4/74	1.10549e-05	1.10549e-05	Hmgcs1/Cyp51/Msmo1/Nsdhl	Down
WP_TAMOXIFEN_METABOLISM	4/74	2.56536e-05	2.56536e-05	Cyp1a2/Cyp3a2/Fmo1/Sult1e1	Down
WP_NUCLEAR_RECEPTORS_METAPATHWAY	12/74	7.75411e-05	7.75411e-05	Cyp1a2/Esr1/Baat/Abcg5/Cyp3a2/Ehhadh/Epha3/Ces1c/Ces1e/Fasn/Slco1b2/Slc2a5	Down
WP_BENZOAPYRENE_METABOLISM	3/74	0.000132874	0.000132874	Cyp3a2/Akr1c3/Akr1c1	Down
WP_LIVER_X_RECEPTOR_PATHWAY	3/74	0.000132874	0.000132874	Abcg5/Cyp3a2/Fasn	Down
WP_OMEGA9_FATTY_ACID_SYNTHESIS	3/74	0.000390844	0.000390844	Fads2/Fads1/Fasn	Down
